# Supplementary material for: Dynamic metabolome profiling uncovers potential TOR signaling genes
Source: eLife. 2023 Jan 4;12:e84295. doi: 10.7554/eLife.84295 (PMC9812406; doi:10.7554/eLife.84295)
Supplement: Supplementary file 2. [file elife-84295-supp2.xlsx]

## Sheet: information
sheet	column	description
injections	Index	Injection index
injections	SampleName	Name of each sample
injections	Perturbation	Perturbation applied to each sample which is normally genotype followed by minutes after rapamycin treatment
injections	TreatmentTime	Duration of rapamycin treatment in minutes
injections	OD600	OD600 at time of sampling
ions	Index	Ion index
ions	ionMz	M/Z for each ion
ions	ionAverageInt	The average ion intensity for each ion
ions	ionQualTIC	The ion quality as measured by the correlation of the ion intensities with detected total ion current
ions	Top annotation name	The name of the metabolite which is the top annotation for each ion
ions	Top annotation ids	The KEGG ids for the annotation of the ion
ions	Top annotation formula	The molecular formula for the top annotation
ions	Top annotation ion	The ionization form of the top annotation
intensities	Index	Ion index
intensities	ionMz	M/Z for each ion
intensities	Others	Additional columns indicate the ion intensity for each sample across all ions

## Sheet: injections
Index	SampleName	Perturbation	TreatmentTime	OD600
1	19_D4_LST4_90	LST4_90	90	1.3501
2	19_D4_LST4_90	LST4_90	90	1.3501
3	19_A5_DDP1_90	DDP1_90	90	1.602
4	19_A5_DDP1_90	DDP1_90	90	1.602
5	19_D7_APL2_90	APL2_90	90	0.00425
6	19_D7_APL2_90	APL2_90	90	0.00425
7	19_F5_empty2_90	empty2_90	90	0.013295
8	19_F5_empty2_90	empty2_90	90	0.013295
9	19_G8_LST7_90	LST7_90	90	0.0085
10	19_G8_LST7_90	LST7_90	90	0.0085
11	19_F4_ATG14_90	ATG14_90	90	1.5908
12	19_F4_ATG14_90	ATG14_90	90	1.5908
13	19_C10_GAT1_90	GAT1_90	90	0.11237
14	19_C10_GAT1_90	GAT1_90	90	0.11237
15	19_H8_PSR2_90	PSR2_90	90	1.4059
16	19_H8_PSR2_90	PSR2_90	90	1.4059
17	19_G12_MEP1_90	MEP1_90	90	0.0074184
18	19_G12_MEP1_90	MEP1_90	90	0.0074184
19	19_E2_TIP41_90	TIP41_90	90	1.6097
20	19_E2_TIP41_90	TIP41_90	90	1.6097
21	19_B4_SLM1_90	SLM1_90	90	1.5981
22	19_B4_SLM1_90	SLM1_90	90	1.5981
23	19_H7_PSR1_90	PSR1_90	90	1.5082
24	19_H7_PSR1_90	PSR1_90	90	1.5082
25	19_G6_PPM1_90	PPM1_90	90	1.6097
26	19_G6_PPM1_90	PPM1_90	90	1.6097
27	19_C1_MSN2_90	MSN2_90	90	1.4097
28	19_C1_MSN2_90	MSN2_90	90	1.4097
29	ctrl_p19_c1	pooled	0	1
30	ctrl_p19_c1	pooled	0	1
31	19_A3_SKO1_90	SKO1_90	90	1.5489
32	19_A3_SKO1_90	SKO1_90	90	1.5489
33	19_B10_ORM1_90	ORM1_90	90	0.00425
34	19_B10_ORM1_90	ORM1_90	90	0.00425
35	19_E11_RAS2_90	RAS2_90	90	0.0074184
36	19_E11_RAS2_90	RAS2_90	90	0.0074184
37	19_E4_MSN4_90	MSN4_90	90	1.5655
38	19_E4_MSN4_90	MSN4_90	90	1.5655
39	19_E1_FAP1_90	FAP1_90	90	1.3317
40	19_E1_FAP1_90	FAP1_90	90	1.3317
41	19_A10_GCN4_90	GCN4_90	90	0.65574
42	19_A10_GCN4_90	GCN4_90	90	0.65574
43	19_H5_BIT61_90	BIT61_90	90	1.5908
44	19_H5_BIT61_90	BIT61_90	90	1.5908
45	19_C9_RTC1_90	RTC1_90	90	1.5054
46	19_C9_RTC1_90	RTC1_90	90	1.5054
47	19_C7_APL6_90	APL6_90	90	1.4673
48	19_C7_APL6_90	APL6_90	90	1.4673
49	19_E8_STM1_90	STM1_90	90	1.5141
50	19_E8_STM1_90	STM1_90	90	1.5141
51	19_G4_CNL1_90	CNL1_90	90	1.5647
52	19_G4_CNL1_90	CNL1_90	90	1.5647
53	19_A8_CPA1_90	CPA1_90	90	0.0074184
54	19_A8_CPA1_90	CPA1_90	90	0.0074184
55	19_E3_ATG13_90	ATG13_90	90	1.4035
56	19_E3_ATG13_90	ATG13_90	90	1.4035
57	19_E9_WT_90	WT_90	90	1.5599
58	19_E9_WT_90	WT_90	90	1.5599
59	19_H2_MVB12_90	MVB12_90	90	1.4862
60	19_H2_MVB12_90	MVB12_90	90	1.4862
61	19_B9_GAP1_90	GAP1_90	90	1.7185
62	19_B9_GAP1_90	GAP1_90	90	1.7185
63	19_G9_RTG2_90	RTG2_90	90	0.0076853
64	19_G9_RTG2_90	RTG2_90	90	0.0076853
65	19_G1_GIS1_90	GIS1_90	90	1.4313
66	19_G1_GIS1_90	GIS1_90	90	1.4313
67	19_F3_RTG3_90	RTG3_90	90	0.01275
68	19_F3_RTG3_90	RTG3_90	90	0.01275
69	19_F8_PAR32_90	PAR32_90	90	1.4214
70	19_F8_PAR32_90	PAR32_90	90	1.4214
71	19_D9_MEH1_90	MEH1_90	90	1.3554
72	19_D9_MEH1_90	MEH1_90	90	1.3554
73	19_A7_WT_90	WT_90	90	1.5704
74	19_A7_WT_90	WT_90	90	1.5704
75	19_D11_WT_90	WT_90	90	1.4216
76	19_D11_WT_90	WT_90	90	1.4216
77	19_C5_SLM2_90	SLM2_90	90	1.5659
78	19_C5_SLM2_90	SLM2_90	90	1.5659
79	19_C12_AGX1_90	AGX1_90	90	1.5318
80	19_C12_AGX1_90	AGX1_90	90	1.5318
81	ctrl_p19_c1	pooled	0	1
82	ctrl_p19_c1	pooled	0	1
83	19_C11_GTR1_90	GTR1_90	90	1.3216
84	19_C11_GTR1_90	GTR1_90	90	1.3216
85	19_B3_NPR3_90	NPR3_90	90	1.6365
86	19_B3_NPR3_90	NPR3_90	90	1.6365
87	19_D5_LTV1_90	LTV1_90	90	0.0085
88	19_D5_LTV1_90	LTV1_90	90	0.0085
89	19_F6_empty3_90	empty3_90	90	0.0085
90	19_F6_empty3_90	empty3_90	90	0.0085
91	19_A9_RTG1_90	RTG1_90	90	0.0074184
92	19_A9_RTG1_90	RTG1_90	90	0.0074184
93	19_G11_GTR2_90	GTR2_90	90	1.1835
94	19_G11_GTR2_90	GTR2_90	90	1.1835
95	19_D8_ALY1_90	ALY1_90	90	1.272
96	19_D8_ALY1_90	ALY1_90	90	1.272
97	19_D12_CSR1_90	CSR1_90	90	0.19615
98	19_D12_CSR1_90	CSR1_90	90	0.19615
99	19_B7_PTC6_90	PTC6_90	90	1.4844
100	19_B7_PTC6_90	PTC6_90	90	1.4844
101	19_D10_ATG39_90	ATG39_90	90	1.4871
102	19_D10_ATG39_90	ATG39_90	90	1.4871
103	19_A11_RRD2_90	RRD2_90	90	0.19615
104	19_A11_RRD2_90	RRD2_90	90	0.19615
105	19_D2_NNK1_90	NNK1_90	90	1.6162
106	19_D2_NNK1_90	NNK1_90	90	1.6162
107	19_E10_AVT4_90	AVT4_90	90	1.462
108	19_E10_AVT4_90	AVT4_90	90	1.462
109	19_A12_GLN3_90	GLN3_90	90	0.00425
110	19_A12_GLN3_90	GLN3_90	90	0.00425
111	19_E6_VPS24_90	VPS24_90	90	1.0636
112	19_E6_VPS24_90	VPS24_90	90	1.0636
113	19_B1_NPR2_90	NPR2_90	90	0.37148
114	19_B1_NPR2_90	NPR2_90	90	0.37148
115	19_H4_CCR4_90	CCR4_90	90	0.00425
116	19_H4_CCR4_90	CCR4_90	90	0.00425
117	19_G2_MTC5_90	MTC5_90	90	1.5438
118	19_G2_MTC5_90	MTC5_90	90	1.5438
119	19_B8_TPD3_90	TPD3_90	90	0.00425
120	19_B8_TPD3_90	TPD3_90	90	0.00425
121	19_E12_PUT1_90	PUT1_90	90	1.4999
122	19_E12_PUT1_90	PUT1_90	90	1.4999
123	19_A4_ATG40_90	ATG40_90	90	1.5446
124	19_A4_ATG40_90	ATG40_90	90	1.5446
125	19_H9_BUL1_90	BUL1_90	90	1.564
126	19_H9_BUL1_90	BUL1_90	90	1.564
127	19_F1_PHO85_90	PHO85_90	90	0.010198
128	19_F1_PHO85_90	PHO85_90	90	0.010198
129	19_F2_SEA4_90	SEA4_90	90	1.4734
130	19_F2_SEA4_90	SEA4_90	90	1.4734
131	19_F11_DOA4_90	DOA4_90	90	0.7985
132	19_F11_DOA4_90	DOA4_90	90	0.7985
133	ctrl_p19_c1	pooled	0	1
134	ctrl_p19_c1	pooled	0	1
135	19_A6_VAM3_90	VAM3_90	90	0.96333
136	19_A6_VAM3_90	VAM3_90	90	0.96333
137	19_D3_YPK1_90	YPK1_90	90	1.6553
138	19_D3_YPK1_90	YPK1_90	90	1.6553
139	19_C3_WT_90	WT_90	90	1.5642
140	19_C3_WT_90	WT_90	90	1.5642
141	19_H10_KSP1_90	KSP1_90	90	1.329
142	19_H10_KSP1_90	KSP1_90	90	1.329
143	19_A1_NPR1_90	NPR1_90	90	0.68476
144	19_A1_NPR1_90	NPR1_90	90	0.68476
145	19_H12_SIT4_90	SIT4_90	90	0.19615
146	19_H12_SIT4_90	SIT4_90	90	0.19615
147	19_B5_WT_90	WT_90	90	1.5472
148	19_B5_WT_90	WT_90	90	1.5472
149	19_B11_DBF2_90	DBF2_90	90	0.00425
150	19_B11_DBF2_90	DBF2_90	90	0.00425
151	19_F9_VAM6_90	VAM6_90	90	0.55293
152	19_F9_VAM6_90	VAM6_90	90	0.55293
153	19_H6_ALY2_90	ALY2_90	90	1.4917
154	19_H6_ALY2_90	ALY2_90	90	1.4917
155	19_H3_WT_90	WT_90	90	1.6207
156	19_H3_WT_90	WT_90	90	1.6207
157	19_F10_PPH21_90	PPH21_90	90	1.223
158	19_F10_PPH21_90	PPH21_90	90	1.223
159	19_E7_FPR1_90	FPR1_90	90	1.5137
160	19_E7_FPR1_90	FPR1_90	90	1.5137
161	19_B6_RRD1_90	RRD1_90	90	1.7236
162	19_B6_RRD1_90	RRD1_90	90	1.7236
163	19_H1_PBP1_90	PBP1_90	90	1.4837
164	19_H1_PBP1_90	PBP1_90	90	1.4837
165	19_B12_BIT2_90	BIT2_90	90	0.0074184
166	19_B12_BIT2_90	BIT2_90	90	0.0074184
167	19_F7_WT_90	WT_90	90	1.5724
168	19_F7_WT_90	WT_90	90	1.5724
169	19_G10_PDE1_90	PDE1_90	90	0.00425
170	19_G10_PDE1_90	PDE1_90	90	0.00425
171	19_G3_ARO1_90	ARO1_90	90	1.5887
172	19_G3_ARO1_90	ARO1_90	90	1.5887
173	19_G7_MDS3_90	MDS3_90	90	1.5434
174	19_G7_MDS3_90	MDS3_90	90	1.5434
175	ctrl_p19_c1	pooled	0	1
176	ctrl_p19_c1	pooled	0	1
177	ctrl_p20_c1	pooled	0	1
178	ctrl_p20_c1	pooled	0	1
179	20_D2_NNK1_90	NNK1_90	90	1.6645
180	20_D2_NNK1_90	NNK1_90	90	1.6645
181	20_H10_KSP1_90	KSP1_90	90	1.401
182	20_H10_KSP1_90	KSP1_90	90	1.401
183	20_H2_MVB12_90	MVB12_90	90	1.5833
184	20_H2_MVB12_90	MVB12_90	90	1.5833
185	20_G10_PDE1_90	PDE1_90	90	0.00425
186	20_G10_PDE1_90	PDE1_90	90	0.00425
187	20_D9_MEH1_90	MEH1_90	90	1.4119
188	20_D9_MEH1_90	MEH1_90	90	1.4119
189	20_F6_empty3_90	empty3_90	90	0.0085
190	20_F6_empty3_90	empty3_90	90	0.0085
191	20_G9_RTG2_90	RTG2_90	90	0.0076364
192	20_G9_RTG2_90	RTG2_90	90	0.0076364
193	20_E3_ATG13_90	ATG13_90	90	1.2235
194	20_E3_ATG13_90	ATG13_90	90	1.2235
195	20_D11_WT_90	WT_90	90	1.4986
196	20_D11_WT_90	WT_90	90	1.4986
197	20_E8_STM1_90	STM1_90	90	1.6705
198	20_E8_STM1_90	STM1_90	90	1.6705
199	20_G12_MEP1_90	MEP1_90	90	0.00425
200	20_G12_MEP1_90	MEP1_90	90	0.00425
201	20_G7_MDS3_90	MDS3_90	90	1.52
202	20_G7_MDS3_90	MDS3_90	90	1.52
203	20_F2_SEA4_90	SEA4_90	90	1.6064
204	20_F2_SEA4_90	SEA4_90	90	1.6064
205	20_H8_PSR2_90	PSR2_90	90	1.4412
206	20_H8_PSR2_90	PSR2_90	90	1.4412
207	20_B4_SLM1_90	SLM1_90	90	1.6003
208	20_B4_SLM1_90	SLM1_90	90	1.6003
209	20_D3_YPK1_90	YPK1_90	90	1.3363
210	20_D3_YPK1_90	YPK1_90	90	1.3363
211	20_E11_RAS2_90	RAS2_90	90	0.0085
212	20_E11_RAS2_90	RAS2_90	90	0.0085
213	20_F3_RTG3_90	RTG3_90	90	0.01333
214	20_F3_RTG3_90	RTG3_90	90	0.01333
215	20_D6_APE2_90	APE2_90	90	1.6071
216	20_D6_APE2_90	APE2_90	90	1.6071
217	20_H12_SIT4_90	SIT4_90	90	0.19615
218	20_H12_SIT4_90	SIT4_90	90	0.19615
219	20_C11_GTR1_90	GTR1_90	90	1.3323
220	20_C11_GTR1_90	GTR1_90	90	1.3323
221	20_E2_TIP41_90	TIP41_90	90	1.7391
222	20_E2_TIP41_90	TIP41_90	90	1.7391
223	20_C1_MSN2_90	MSN2_90	90	1.4772
224	20_C1_MSN2_90	MSN2_90	90	1.4772
225	20_C7_APL6_90	APL6_90	90	1.431
226	20_C7_APL6_90	APL6_90	90	1.431
227	20_B9_GAP1_90	GAP1_90	90	1.6384
228	20_B9_GAP1_90	GAP1_90	90	1.6384
229	ctrl_p20_c1	pooled	0	1
230	ctrl_p20_c1	pooled	0	1
231	20_H5_BIT61_90	BIT61_90	90	1.5799
232	20_H5_BIT61_90	BIT61_90	90	1.5799
233	20_F4_ATG14_90	ATG14_90	90	1.621
234	20_F4_ATG14_90	ATG14_90	90	1.621
235	20_B11_DBF2_90	DBF2_90	90	0.00425
236	20_B11_DBF2_90	DBF2_90	90	0.00425
237	20_C12_AGX1_90	AGX1_90	90	1.4566
238	20_C12_AGX1_90	AGX1_90	90	1.4566
239	20_C5_SLM2_90	SLM2_90	90	1.5859
240	20_C5_SLM2_90	SLM2_90	90	1.5859
241	20_G3_ARO1_90	ARO1_90	90	1.2912
242	20_G3_ARO1_90	ARO1_90	90	1.2912
243	20_A8_CPA1_90	CPA1_90	90	0.00425
244	20_A8_CPA1_90	CPA1_90	90	0.00425
245	20_F11_DOA4_90	DOA4_90	90	0.89154
246	20_F11_DOA4_90	DOA4_90	90	0.89154
247	20_C6_POR1_90	POR1_90	90	0.71424
248	20_C6_POR1_90	POR1_90	90	0.71424
249	20_E6_VPS24_90	VPS24_90	90	1.153
250	20_E6_VPS24_90	VPS24_90	90	1.153
251	20_C8_PKH2_90	PKH2_90	90	1.5824
252	20_C8_PKH2_90	PKH2_90	90	1.5824
253	20_D4_LST4_90	LST4_90	90	1.3648
254	20_D4_LST4_90	LST4_90	90	1.3648
255	20_G6_PPM1_90	PPM1_90	90	1.5986
256	20_G6_PPM1_90	PPM1_90	90	1.5986
257	20_D5_LTV1_90	LTV1_90	90	0.0085
258	20_D5_LTV1_90	LTV1_90	90	0.0085
259	20_G1_GIS1_90	GIS1_90	90	1.5782
260	20_G1_GIS1_90	GIS1_90	90	1.5782
261	20_A3_SKO1_90	SKO1_90	90	1.3366
262	20_A3_SKO1_90	SKO1_90	90	1.3366
263	20_G8_LST7_90	LST7_90	90	0.0085
264	20_G8_LST7_90	LST7_90	90	0.0085
265	20_G5_WT_90	WT_90	90	1.6098
266	20_G5_WT_90	WT_90	90	1.6098
267	20_B8_TPD3_90	TPD3_90	90	0.0076846
268	20_B8_TPD3_90	TPD3_90	90	0.0076846
269	20_A7_WT_90	WT_90	90	1.4333
270	20_A7_WT_90	WT_90	90	1.4333
271	20_A9_RTG1_90	RTG1_90	90	0.10848
272	20_A9_RTG1_90	RTG1_90	90	0.10848
273	20_D12_CSR1_90	CSR1_90	90	0.19615
274	20_D12_CSR1_90	CSR1_90	90	0.19615
275	20_H1_PBP1_90	PBP1_90	90	1.5813
276	20_H1_PBP1_90	PBP1_90	90	1.5813
277	20_G4_CNL1_90	CNL1_90	90	1.6189
278	20_G4_CNL1_90	CNL1_90	90	1.6189
279	20_C3_WT_90	WT_90	90	1.1661
280	20_C3_WT_90	WT_90	90	1.1661
281	ctrl_p20_c1	pooled	0	1
282	ctrl_p20_c1	pooled	0	1
283	20_F8_PAR32_90	PAR32_90	90	1.5901
284	20_F8_PAR32_90	PAR32_90	90	1.5901
285	20_C2_YPK2_90	YPK2_90	90	1.537
286	20_C2_YPK2_90	YPK2_90	90	1.537
287	20_A6_VAM3_90	VAM3_90	90	0.96234
288	20_A6_VAM3_90	VAM3_90	90	0.96234
289	20_E9_WT_90	WT_90	90	1.6266
290	20_E9_WT_90	WT_90	90	1.6266
291	20_F9_VAM6_90	VAM6_90	90	0.62705
292	20_F9_VAM6_90	VAM6_90	90	0.62705
293	20_D10_ATG39_90	ATG39_90	90	1.5473
294	20_D10_ATG39_90	ATG39_90	90	1.5473
295	20_H7_PSR1_90	PSR1_90	90	1.5264
296	20_H7_PSR1_90	PSR1_90	90	1.5264
297	20_A5_DDP1_90	DDP1_90	90	1.6056
298	20_A5_DDP1_90	DDP1_90	90	1.6056
299	20_B3_NPR3_90	NPR3_90	90	1.2718
300	20_B3_NPR3_90	NPR3_90	90	1.2718
301	20_H6_ALY2_90	ALY2_90	90	1.6141
302	20_H6_ALY2_90	ALY2_90	90	1.6141
303	20_A4_ATG40_90	ATG40_90	90	1.585
304	20_A4_ATG40_90	ATG40_90	90	1.585
305	20_F7_WT_90	WT_90	90	1.6218
306	20_F7_WT_90	WT_90	90	1.6218
307	20_D7_APL2_90	APL2_90	90	0.0047306
308	20_D7_APL2_90	APL2_90	90	0.0047306
309	20_E4_MSN4_90	MSN4_90	90	1.6746
310	20_E4_MSN4_90	MSN4_90	90	1.6746
311	20_G2_MTC5_90	MTC5_90	90	1.6233
312	20_G2_MTC5_90	MTC5_90	90	1.6233
313	20_B12_BIT2_90	BIT2_90	90	0.00425
314	20_B12_BIT2_90	BIT2_90	90	0.00425
315	20_B7_PTC6_90	PTC6_90	90	1.4779
316	20_B7_PTC6_90	PTC6_90	90	1.4779
317	20_E5_MEP3_90	MEP3_90	90	1.6054
318	20_E5_MEP3_90	MEP3_90	90	1.6054
319	20_F10_PPH21_90	PPH21_90	90	1.2947
320	20_F10_PPH21_90	PPH21_90	90	1.2947
321	20_E12_PUT1_90	PUT1_90	90	1.5044
322	20_E12_PUT1_90	PUT1_90	90	1.5044
323	20_B10_ORM1_90	ORM1_90	90	0.0076846
324	20_B10_ORM1_90	ORM1_90	90	0.0076846
325	20_H11_SLM4_90	SLM4_90	90	1.3907
326	20_H11_SLM4_90	SLM4_90	90	1.3907
327	20_B6_RRD1_90	RRD1_90	90	1.6677
328	20_B6_RRD1_90	RRD1_90	90	1.6677
329	20_C4_RIM15_90	RIM15_90	90	1.472
330	20_C4_RIM15_90	RIM15_90	90	1.472
331	20_C9_RTC1_90	RTC1_90	90	1.5376
332	20_C9_RTC1_90	RTC1_90	90	1.5376
333	ctrl_p20_c1	pooled	0	1
334	ctrl_p20_c1	pooled	0	1
335	20_A1_NPR1_90	NPR1_90	90	0.72995
336	20_A1_NPR1_90	NPR1_90	90	0.72995
337	20_E1_FAP1_90	FAP1_90	90	1.3388
338	20_E1_FAP1_90	FAP1_90	90	1.3388
339	20_F1_PHO85_90	PHO85_90	90	0.0094613
340	20_F1_PHO85_90	PHO85_90	90	0.0094613
341	20_A11_RRD2_90	RRD2_90	90	0.00425
342	20_A11_RRD2_90	RRD2_90	90	0.00425
343	20_G11_GTR2_90	GTR2_90	90	1.2694
344	20_G11_GTR2_90	GTR2_90	90	1.2694
345	20_H9_BUL1_90	BUL1_90	90	1.6072
346	20_H9_BUL1_90	BUL1_90	90	1.6072
347	20_D1_WT_90	WT_90	90	1.5654
348	20_D1_WT_90	WT_90	90	1.5654
349	20_A10_GCN4_90	GCN4_90	90	0.71813
350	20_A10_GCN4_90	GCN4_90	90	0.71813
351	20_B5_WT_90	WT_90	90	1.4812
352	20_B5_WT_90	WT_90	90	1.4812
353	20_A2_WHI2_90	WHI2_90	90	1.4592
354	20_A2_WHI2_90	WHI2_90	90	1.4592
355	20_E7_FPR1_90	FPR1_90	90	1.544
356	20_E7_FPR1_90	FPR1_90	90	1.544
357	20_F12_BMH2_90	BMH2_90	90	1.5396
358	20_F12_BMH2_90	BMH2_90	90	1.5396
359	20_H3_WT_90	WT_90	90	1.3471
360	20_H3_WT_90	WT_90	90	1.3471
361	20_C10_GAT1_90	GAT1_90	90	0.19615
362	20_C10_GAT1_90	GAT1_90	90	0.19615
363	20_B1_NPR2_90	NPR2_90	90	0.28329
364	20_B1_NPR2_90	NPR2_90	90	0.28329
365	20_D8_ALY1_90	ALY1_90	90	1.3881
366	20_D8_ALY1_90	ALY1_90	90	1.3881
367	20_A12_GLN3_90	GLN3_90	90	0.010759
368	20_A12_GLN3_90	GLN3_90	90	0.010759
369	20_F5_empty2_90	empty2_90	90	0.01275
370	20_F5_empty2_90	empty2_90	90	0.01275
371	20_E10_AVT4_90	AVT4_90	90	1.5499
372	20_E10_AVT4_90	AVT4_90	90	1.5499
373	20_H4_CCR4_90	CCR4_90	90	0.0047306
374	20_H4_CCR4_90	CCR4_90	90	0.0047306
375	ctrl_p20_c1	pooled	0	1
376	ctrl_p20_c1	pooled	0	1
377	ctrl_p01_c1	pooled	0	1
378	ctrl_p01_c1	pooled	0	1
379	1_G4_CNL1_0	CNL1_0	0	1.2793
380	1_G4_CNL1_0	CNL1_0	0	1.2793
381	1_B8_TPD3_0	TPD3_0	0	0.00425
382	1_B8_TPD3_0	TPD3_0	0	0.00425
383	1_B1_NPR2_0	NPR2_0	0	0.5185
384	1_B1_NPR2_0	NPR2_0	0	0.5185
385	1_B6_RRD1_0	RRD1_0	0	0.5355
386	1_B6_RRD1_0	RRD1_0	0	0.5355
387	1_H11_SLM4_0	SLM4_0	0	1.105
388	1_H11_SLM4_0	SLM4_0	0	1.105
389	1_D3_YPK1_0	YPK1_0	0	1.241
390	1_D3_YPK1_0	YPK1_0	0	1.241
391	1_B4_SLM1_0	SLM1_0	0	1.1263
392	1_B4_SLM1_0	SLM1_0	0	1.1263
393	1_E9_WT_0	WT_0	0	1.2367
394	1_E9_WT_0	WT_0	0	1.2367
395	1_B12_BIT2_0	BIT2_0	0	0
396	1_B12_BIT2_0	BIT2_0	0	0
397	1_F3_RTG3_0	RTG3_0	0	0.01275
398	1_F3_RTG3_0	RTG3_0	0	0.01275
399	1_A2_WHI2_0	WHI2_0	0	1.071
400	1_A2_WHI2_0	WHI2_0	0	1.071
401	1_A6_VAM3_0	VAM3_0	0	0.5355
402	1_A6_VAM3_0	VAM3_0	0	0.5355
403	1_F8_PAR32_0	PAR32_0	0	1.1475
404	1_F8_PAR32_0	PAR32_0	0	1.1475
405	1_D4_LST4_0	LST4_0	0	1.054
406	1_D4_LST4_0	LST4_0	0	1.054
407	1_F1_PHO85_0	PHO85_0	0	0.00425
408	1_F1_PHO85_0	PHO85_0	0	0.00425
409	1_B11_DBF2_0	DBF2_0	0	0.00425
410	1_B11_DBF2_0	DBF2_0	0	0.00425
411	1_H8_PSR2_0	PSR2_0	0	1.1347
412	1_H8_PSR2_0	PSR2_0	0	1.1347
413	1_G9_RTG2_0	RTG2_0	0	0.0085
414	1_G9_RTG2_0	RTG2_0	0	0.0085
415	1_C8_PKH2_0	PKH2_0	0	1.207
416	1_C8_PKH2_0	PKH2_0	0	1.207
417	1_B5_WT_0	WT_0	0	1.1858
418	1_B5_WT_0	WT_0	0	1.1858
419	1_E2_TIP41_0	TIP41_0	0	1.2835
420	1_E2_TIP41_0	TIP41_0	0	1.2835
421	1_G1_GIS1_0	GIS1_0	0	1.1263
422	1_G1_GIS1_0	GIS1_0	0	1.1263
423	1_E6_VPS24_0	VPS24_0	0	0.73525
424	1_E6_VPS24_0	VPS24_0	0	0.73525
425	1_B10_ORM1_0	ORM1_0	0	0.5015
426	1_B10_ORM1_0	ORM1_0	0	0.5015
427	1_A3_SKO1_0	SKO1_0	0	1.173
428	1_A3_SKO1_0	SKO1_0	0	1.173
429	ctrl_p01_c1	pooled	0	1
430	ctrl_p01_c1	pooled	0	1
431	1_D1_WT_0	WT_0	0	0.97325
432	1_D1_WT_0	WT_0	0	0.97325
433	1_A9_RTG1_0	RTG1_0	0	0.00425
434	1_A9_RTG1_0	RTG1_0	0	0.00425
435	1_A12_GLN3_0	GLN3_0	0	0.00425
436	1_A12_GLN3_0	GLN3_0	0	0.00425
437	1_E7_FPR1_0	FPR1_0	0	1.0923
438	1_E7_FPR1_0	FPR1_0	0	1.0923
439	1_A10_GCN4_0	GCN4_0	0	0.51
440	1_A10_GCN4_0	GCN4_0	0	0.51
441	1_C6_POR1_0	POR1_0	0	0.4335
442	1_C6_POR1_0	POR1_0	0	0.4335
443	1_F12_BMH2_0	BMH2_0	0	1.1135
444	1_F12_BMH2_0	BMH2_0	0	1.1135
445	1_G8_LST7_0	LST7_0	0	0.0085
446	1_G8_LST7_0	LST7_0	0	0.0085
447	1_A11_RRD2_0	RRD2_0	0	0.00425
448	1_A11_RRD2_0	RRD2_0	0	0.00425
449	1_E8_STM1_0	STM1_0	0	1.2495
450	1_E8_STM1_0	STM1_0	0	1.2495
451	1_D12_CSR1_0	CSR1_0	0	-0.0085
452	1_D12_CSR1_0	CSR1_0	0	-0.0085
453	1_C7_APL6_0	APL6_0	0	1.071
454	1_C7_APL6_0	APL6_0	0	1.071
455	1_C2_YPK2_0	YPK2_0	0	0.96475
456	1_C2_YPK2_0	YPK2_0	0	0.96475
457	1_B3_NPR3_0	NPR3_0	0	1.1347
458	1_B3_NPR3_0	NPR3_0	0	1.1347
459	1_G3_ARO1_0	ARO1_0	0	1.2537
460	1_G3_ARO1_0	ARO1_0	0	1.2537
461	1_E11_RAS2_0	RAS2_0	0	0.00425
462	1_E11_RAS2_0	RAS2_0	0	0.00425
463	1_E1_FAP1_0	FAP1_0	0	0.87125
464	1_E1_FAP1_0	FAP1_0	0	0.87125
465	1_B7_PTC6_0	PTC6_0	0	1.0115
466	1_B7_PTC6_0	PTC6_0	0	1.0115
467	1_D7_APL2_0	APL2_0	0	0.00425
468	1_D7_APL2_0	APL2_0	0	0.00425
469	1_F7_WT_0	WT_0	0	1.1093
470	1_F7_WT_0	WT_0	0	1.1093
471	1_H7_PSR1_0	PSR1_0	0	1.0837
472	1_H7_PSR1_0	PSR1_0	0	1.0837
473	1_H2_MVB12_0	MVB12_0	0	1.1305
474	1_H2_MVB12_0	MVB12_0	0	1.1305
475	1_G5_WT_0	WT_0	0	1.2878
476	1_G5_WT_0	WT_0	0	1.2878
477	1_E4_MSN4_0	MSN4_0	0	1.3048
478	1_E4_MSN4_0	MSN4_0	0	1.3048
479	1_D6_APE2_0	APE2_0	0	1.241
480	1_D6_APE2_0	APE2_0	0	1.241
481	ctrl_p01_c1	pooled	0	1
482	ctrl_p01_c1	pooled	0	1
483	1_A8_CPA1_0	CPA1_0	0	0.0085
484	1_A8_CPA1_0	CPA1_0	0	0.0085
485	1_F6_empty3_0	empty3_0	0	0.00425
486	1_F6_empty3_0	empty3_0	0	0.00425
487	1_E12_PUT1_0	PUT1_0	0	1.1347
488	1_E12_PUT1_0	PUT1_0	0	1.1347
489	1_D2_NNK1_0	NNK1_0	0	1.2325
490	1_D2_NNK1_0	NNK1_0	0	1.2325
491	1_G2_MTC5_0	MTC5_0	0	1.2368
492	1_G2_MTC5_0	MTC5_0	0	1.2368
493	1_H12_SIT4_0	SIT4_0	0	0.00425
494	1_H12_SIT4_0	SIT4_0	0	0.00425
495	1_E3_ATG13_0	ATG13_0	0	1.1475
496	1_E3_ATG13_0	ATG13_0	0	1.1475
497	1_B9_GAP1_0	GAP1_0	0	0.0085
498	1_B9_GAP1_0	GAP1_0	0	0.0085
499	1_D11_WT_0	WT_0	0	1.1263
500	1_D11_WT_0	WT_0	0	1.1263
501	1_G6_PPM1_0	PPM1_0	0	1.105
502	1_G6_PPM1_0	PPM1_0	0	1.105
503	1_D5_LTV1_0	LTV1_0	0	0.00425
504	1_D5_LTV1_0	LTV1_0	0	0.00425
505	1_F2_SEA4_0	SEA4_0	0	1.1305
506	1_F2_SEA4_0	SEA4_0	0	1.1305
507	1_F5_empty2_0	empty2_0	0	0.0085
508	1_F5_empty2_0	empty2_0	0	0.0085
509	1_F10_PPH21_0	PPH21_0	0	0.99025
510	1_F10_PPH21_0	PPH21_0	0	0.99025
511	1_C4_RIM15_0	RIM15_0	0	1.1263
512	1_C4_RIM15_0	RIM15_0	0	1.1263
513	1_C3_WT_0	WT_0	0	0.96475
514	1_C3_WT_0	WT_0	0	0.96475
515	1_H1_PBP1_0	PBP1_0	0	1.1858
516	1_H1_PBP1_0	PBP1_0	0	1.1858
517	1_A5_DDP1_0	DDP1_0	0	1.2368
518	1_A5_DDP1_0	DDP1_0	0	1.2368
519	1_C11_GTR1_0	GTR1_0	0	0.98175
520	1_C11_GTR1_0	GTR1_0	0	0.98175
521	1_D10_ATG39_0	ATG39_0	0	1.1858
522	1_D10_ATG39_0	ATG39_0	0	1.1858
523	1_H4_CCR4_0	CCR4_0	0	0.00425
524	1_H4_CCR4_0	CCR4_0	0	0.00425
525	1_C12_AGX1_0	AGX1_0	0	1.1347
526	1_C12_AGX1_0	AGX1_0	0	1.1347
527	1_H5_BIT61_0	BIT61_0	0	1.258
528	1_H5_BIT61_0	BIT61_0	0	1.258
529	1_H6_ALY2_0	ALY2_0	0	1.2495
530	1_H6_ALY2_0	ALY2_0	0	1.2495
531	1_A4_ATG40_0	ATG40_0	0	1.1687
532	1_A4_ATG40_0	ATG40_0	0	1.1687
533	ctrl_p01_c1	pooled	0	1
534	ctrl_p01_c1	pooled	0	1
535	1_C1_MSN2_0	MSN2_0	0	0.9775
536	1_C1_MSN2_0	MSN2_0	0	0.9775
537	1_H10_KSP1_0	KSP1_0	0	1.0583
538	1_H10_KSP1_0	KSP1_0	0	1.0583
539	1_F4_ATG14_0	ATG14_0	0	1.2113
540	1_F4_ATG14_0	ATG14_0	0	1.2113
541	1_G10_PDE1_0	PDE1_0	0	0
542	1_G10_PDE1_0	PDE1_0	0	0
543	1_A1_NPR1_0	NPR1_0	0	0.53975
544	1_A1_NPR1_0	NPR1_0	0	0.53975
545	1_E5_MEP3_0	MEP3_0	0	1.2538
546	1_E5_MEP3_0	MEP3_0	0	1.2538
547	1_A7_WT_0	WT_0	0	1.0243
548	1_A7_WT_0	WT_0	0	1.0243
549	1_D8_ALY1_0	ALY1_0	0	1.0328
550	1_D8_ALY1_0	ALY1_0	0	1.0328
551	1_F9_VAM6_0	VAM6_0	0	0.3825
552	1_F9_VAM6_0	VAM6_0	0	0.3825
553	1_C5_SLM2_0	SLM2_0	0	1.1773
554	1_C5_SLM2_0	SLM2_0	0	1.1773
555	1_D9_MEH1_0	MEH1_0	0	0.9775
556	1_D9_MEH1_0	MEH1_0	0	0.9775
557	1_E10_AVT4_0	AVT4_0	0	1.1347
558	1_E10_AVT4_0	AVT4_0	0	1.1347
559	1_C10_GAT1_0	GAT1_0	0	0
560	1_C10_GAT1_0	GAT1_0	0	0
561	1_F11_DOA4_0	DOA4_0	0	0.52275
562	1_F11_DOA4_0	DOA4_0	0	0.52275
563	1_G11_GTR2_0	GTR2_0	0	0.952
564	1_G11_GTR2_0	GTR2_0	0	0.952
565	1_G7_MDS3_0	MDS3_0	0	1.1433
566	1_G7_MDS3_0	MDS3_0	0	1.1433
567	1_G12_MEP1_0	MEP1_0	0	0.01275
568	1_G12_MEP1_0	MEP1_0	0	0.01275
569	1_C9_RTC1_0	RTC1_0	0	1.1773
570	1_C9_RTC1_0	RTC1_0	0	1.1773
571	1_H3_WT_0	WT_0	0	1.3132
572	1_H3_WT_0	WT_0	0	1.3132
573	1_H9_BUL1_0	BUL1_0	0	1.2325
574	1_H9_BUL1_0	BUL1_0	0	1.2325
575	ctrl_p01_c1	pooled	0	1
576	ctrl_p01_c1	pooled	0	1
577	ctrl_p02_c1	pooled	0	1
578	ctrl_p02_c1	pooled	0	1
579	2_F10_PPH21_0	PPH21_0	0	0.9265
580	2_F10_PPH21_0	PPH21_0	0	0.9265
581	2_B6_RRD1_0	RRD1_0	0	1.3048
582	2_B6_RRD1_0	RRD1_0	0	1.3048
583	2_D7_APL2_0	APL2_0	0	0.00425
584	2_D7_APL2_0	APL2_0	0	0.00425
585	2_E5_MEP3_0	MEP3_0	0	1.1985
586	2_E5_MEP3_0	MEP3_0	0	1.1985
587	2_F7_WT_0	WT_0	0	1.1433
588	2_F7_WT_0	WT_0	0	1.1433
589	2_D1_WT_0	WT_0	0	0.969
590	2_D1_WT_0	WT_0	0	0.969
591	2_H8_PSR2_0	PSR2_0	0	1.1007
592	2_H8_PSR2_0	PSR2_0	0	1.1007
593	2_G4_CNL1_0	CNL1_0	0	1.241
594	2_G4_CNL1_0	CNL1_0	0	1.241
595	2_A5_DDP1_0	DDP1_0	0	1.1305
596	2_A5_DDP1_0	DDP1_0	0	1.1305
597	2_H7_PSR1_0	PSR1_0	0	1.1178
598	2_H7_PSR1_0	PSR1_0	0	1.1178
599	2_C7_APL6_0	APL6_0	0	1.1007
600	2_C7_APL6_0	APL6_0	0	1.1007
601	2_G7_MDS3_0	MDS3_0	0	1.1858
602	2_G7_MDS3_0	MDS3_0	0	1.1858
603	2_D5_LTV1_0	LTV1_0	0	0.0085
604	2_D5_LTV1_0	LTV1_0	0	0.0085
605	2_H12_SIT4_0	SIT4_0	0	0
606	2_H12_SIT4_0	SIT4_0	0	0
607	2_D11_WT_0	WT_0	0	1.156
608	2_D11_WT_0	WT_0	0	1.156
609	2_H5_BIT61_0	BIT61_0	0	1.2155
610	2_H5_BIT61_0	BIT61_0	0	1.2155
611	2_D6_APE2_0	APE2_0	0	1.2453
612	2_D6_APE2_0	APE2_0	0	1.2453
613	2_C3_WT_0	WT_0	0	1.0455
614	2_C3_WT_0	WT_0	0	1.0455
615	2_G2_MTC5_0	MTC5_0	0	1.2538
616	2_G2_MTC5_0	MTC5_0	0	1.2538
617	2_B8_TPD3_0	TPD3_0	0	0.00425
618	2_B8_TPD3_0	TPD3_0	0	0.00425
619	2_A8_CPA1_0	CPA1_0	0	0.00425
620	2_A8_CPA1_0	CPA1_0	0	0.00425
621	2_E10_AVT4_0	AVT4_0	0	1.1135
622	2_E10_AVT4_0	AVT4_0	0	1.1135
623	2_D4_LST4_0	LST4_0	0	1.0243
624	2_D4_LST4_0	LST4_0	0	1.0243
625	2_H6_ALY2_0	ALY2_0	0	1.2113
626	2_H6_ALY2_0	ALY2_0	0	1.2113
627	2_G5_WT_0	WT_0	0	1.2198
628	2_G5_WT_0	WT_0	0	1.2198
629	ctrl_p02_c1	pooled	0	1
630	ctrl_p02_c1	pooled	0	1
631	2_H2_MVB12_0	MVB12_0	0	1.1518
632	2_H2_MVB12_0	MVB12_0	0	1.1518
633	2_A10_GCN4_0	GCN4_0	0	0.47175
634	2_A10_GCN4_0	GCN4_0	0	0.47175
635	2_B5_WT_0	WT_0	0	0.96475
636	2_B5_WT_0	WT_0	0	0.96475
637	2_E2_TIP41_0	TIP41_0	0	1.2495
638	2_E2_TIP41_0	TIP41_0	0	1.2495
639	2_E9_WT_0	WT_0	0	1.1942
640	2_E9_WT_0	WT_0	0	1.1942
641	2_D10_ATG39_0	ATG39_0	0	1.2453
642	2_D10_ATG39_0	ATG39_0	0	1.2453
643	2_C4_RIM15_0	RIM15_0	0	1.1815
644	2_C4_RIM15_0	RIM15_0	0	1.1815
645	2_G12_MEP1_0	MEP1_0	0	0
646	2_G12_MEP1_0	MEP1_0	0	0
647	2_B9_GAP1_0	GAP1_0	0	1.173
648	2_B9_GAP1_0	GAP1_0	0	1.173
649	2_H4_CCR4_0	CCR4_0	0	0.00425
650	2_H4_CCR4_0	CCR4_0	0	0.00425
651	2_D8_ALY1_0	ALY1_0	0	1.0157
652	2_D8_ALY1_0	ALY1_0	0	1.0157
653	2_D12_CSR1_0	CSR1_0	0	-0.0085
654	2_D12_CSR1_0	CSR1_0	0	-0.0085
655	2_C1_MSN2_0	MSN2_0	0	0.9775
656	2_C1_MSN2_0	MSN2_0	0	0.9775
657	2_E7_FPR1_0	FPR1_0	0	1.1645
658	2_E7_FPR1_0	FPR1_0	0	1.1645
659	2_E6_VPS24_0	VPS24_0	0	0.70125
660	2_E6_VPS24_0	VPS24_0	0	0.70125
661	2_F5_empty2_0	empty2_0	0	0.01275
662	2_F5_empty2_0	empty2_0	0	0.01275
663	2_C5_SLM2_0	SLM2_0	0	1.1645
664	2_C5_SLM2_0	SLM2_0	0	1.1645
665	2_H3_WT_0	WT_0	0	1.2792
666	2_H3_WT_0	WT_0	0	1.2792
667	2_G3_ARO1_0	ARO1_0	0	1.3302
668	2_G3_ARO1_0	ARO1_0	0	1.3302
669	2_A6_VAM3_0	VAM3_0	0	0.646
670	2_A6_VAM3_0	VAM3_0	0	0.646
671	2_G6_PPM1_0	PPM1_0	0	1.173
672	2_G6_PPM1_0	PPM1_0	0	1.173
673	2_A4_ATG40_0	ATG40_0	0	1.122
674	2_A4_ATG40_0	ATG40_0	0	1.122
675	2_D2_NNK1_0	NNK1_0	0	1.2027
676	2_D2_NNK1_0	NNK1_0	0	1.2027
677	2_E4_MSN4_0	MSN4_0	0	1.2453
678	2_E4_MSN4_0	MSN4_0	0	1.2453
679	2_C8_PKH2_0	PKH2_0	0	1.2198
680	2_C8_PKH2_0	PKH2_0	0	1.2198
681	ctrl_p02_c1	pooled	0	1
682	ctrl_p02_c1	pooled	0	1
683	2_H11_SLM4_0	SLM4_0	0	1.0965
684	2_H11_SLM4_0	SLM4_0	0	1.0965
685	2_E3_ATG13_0	ATG13_0	0	1.1347
686	2_E3_ATG13_0	ATG13_0	0	1.1347
687	2_C11_GTR1_0	GTR1_0	0	1.071
688	2_C11_GTR1_0	GTR1_0	0	1.071
689	2_B10_ORM1_0	ORM1_0	0	0
690	2_B10_ORM1_0	ORM1_0	0	0
691	2_F12_BMH2_0	BMH2_0	0	1.1135
692	2_F12_BMH2_0	BMH2_0	0	1.1135
693	2_H10_KSP1_0	KSP1_0	0	1.003
694	2_H10_KSP1_0	KSP1_0	0	1.003
695	2_H9_BUL1_0	BUL1_0	0	1.241
696	2_H9_BUL1_0	BUL1_0	0	1.241
697	2_G11_GTR2_0	GTR2_0	0	0.99875
698	2_G11_GTR2_0	GTR2_0	0	0.99875
699	2_A1_NPR1_0	NPR1_0	0	0.544
700	2_A1_NPR1_0	NPR1_0	0	0.544
701	2_H1_PBP1_0	PBP1_0	0	1.2198
702	2_H1_PBP1_0	PBP1_0	0	1.2198
703	2_F1_PHO85_0	PHO85_0	0	0.00425
704	2_F1_PHO85_0	PHO85_0	0	0.00425
705	2_A2_WHI2_0	WHI2_0	0	0.9775
706	2_A2_WHI2_0	WHI2_0	0	0.9775
707	2_F11_DOA4_0	DOA4_0	0	0.5695
708	2_F11_DOA4_0	DOA4_0	0	0.5695
709	2_C12_AGX1_0	AGX1_0	0	1.0837
710	2_C12_AGX1_0	AGX1_0	0	1.0837
711	2_E8_STM1_0	STM1_0	0	1.2325
712	2_E8_STM1_0	STM1_0	0	1.2325
713	2_F6_empty3_0	empty3_0	0	0.0085
714	2_F6_empty3_0	empty3_0	0	0.0085
715	2_F4_ATG14_0	ATG14_0	0	1.1985
716	2_F4_ATG14_0	ATG14_0	0	1.1985
717	2_B11_DBF2_0	DBF2_0	0	0.00425
718	2_B11_DBF2_0	DBF2_0	0	0.00425
719	2_G8_LST7_0	LST7_0	0	0.0085
720	2_G8_LST7_0	LST7_0	0	0.0085
721	2_D3_YPK1_0	YPK1_0	0	1.2027
722	2_D3_YPK1_0	YPK1_0	0	1.2027
723	2_A7_WT_0	WT_0	0	1.0965
724	2_A7_WT_0	WT_0	0	1.0965
725	2_B3_NPR3_0	NPR3_0	0	1.1433
726	2_B3_NPR3_0	NPR3_0	0	1.1433
727	2_A11_RRD2_0	RRD2_0	0	0.00425
728	2_A11_RRD2_0	RRD2_0	0	0.00425
729	2_D9_MEH1_0	MEH1_0	0	1.0753
730	2_D9_MEH1_0	MEH1_0	0	1.0753
731	2_B12_BIT2_0	BIT2_0	0	0
732	2_B12_BIT2_0	BIT2_0	0	0
733	ctrl_p02_c1	pooled	0	1
734	ctrl_p02_c1	pooled	0	1
735	2_C9_RTC1_0	RTC1_0	0	1.1518
736	2_C9_RTC1_0	RTC1_0	0	1.1518
737	2_G9_RTG2_0	RTG2_0	0	0.01275
738	2_G9_RTG2_0	RTG2_0	0	0.01275
739	2_C6_POR1_0	POR1_0	0	0.53975
740	2_C6_POR1_0	POR1_0	0	0.53975
741	2_A3_SKO1_0	SKO1_0	0	1.1603
742	2_A3_SKO1_0	SKO1_0	0	1.1603
743	2_G1_GIS1_0	GIS1_0	0	1.2027
744	2_G1_GIS1_0	GIS1_0	0	1.2027
745	2_E11_RAS2_0	RAS2_0	0	0.00425
746	2_E11_RAS2_0	RAS2_0	0	0.00425
747	2_B1_NPR2_0	NPR2_0	0	0.2125
748	2_B1_NPR2_0	NPR2_0	0	0.2125
749	2_A9_RTG1_0	RTG1_0	0	0.00425
750	2_A9_RTG1_0	RTG1_0	0	0.00425
751	2_E1_FAP1_0	FAP1_0	0	0.884
752	2_E1_FAP1_0	FAP1_0	0	0.884
753	2_A12_GLN3_0	GLN3_0	0	0.00425
754	2_A12_GLN3_0	GLN3_0	0	0.00425
755	2_C2_YPK2_0	YPK2_0	0	1.003
756	2_C2_YPK2_0	YPK2_0	0	1.003
757	2_G10_PDE1_0	PDE1_0	0	0
758	2_G10_PDE1_0	PDE1_0	0	0
759	2_F9_VAM6_0	VAM6_0	0	0.4335
760	2_F9_VAM6_0	VAM6_0	0	0.4335
761	2_B7_PTC6_0	PTC6_0	0	1.1093
762	2_B7_PTC6_0	PTC6_0	0	1.1093
763	2_F8_PAR32_0	PAR32_0	0	1.1305
764	2_F8_PAR32_0	PAR32_0	0	1.1305
765	2_F3_RTG3_0	RTG3_0	0	0.01275
766	2_F3_RTG3_0	RTG3_0	0	0.01275
767	2_B4_SLM1_0	SLM1_0	0	1.2538
768	2_B4_SLM1_0	SLM1_0	0	1.2538
769	2_C10_GAT1_0	GAT1_0	0	0
770	2_C10_GAT1_0	GAT1_0	0	0
771	2_F2_SEA4_0	SEA4_0	0	1.2155
772	2_F2_SEA4_0	SEA4_0	0	1.2155
773	2_E12_PUT1_0	PUT1_0	0	1.1093
774	2_E12_PUT1_0	PUT1_0	0	1.1093
775	ctrl_p02_c1	pooled	0	1
776	ctrl_p02_c1	pooled	0	1
777	ctrl_p03_c1	pooled	0	1
778	ctrl_p03_c1	pooled	0	1
779	3_F12_BMH2_0	BMH2_0	0	1.173
780	3_F12_BMH2_0	BMH2_0	0	1.173
781	3_D8_ALY1_0	ALY1_0	0	0.9775
782	3_D8_ALY1_0	ALY1_0	0	0.9775
783	3_G2_MTC5_0	MTC5_0	0	1.2027
784	3_G2_MTC5_0	MTC5_0	0	1.2027
785	3_H3_WT_0	WT_0	0	1.2792
786	3_H3_WT_0	WT_0	0	1.2792
787	3_G8_LST7_0	LST7_0	0	0.0085
788	3_G8_LST7_0	LST7_0	0	0.0085
789	3_D3_YPK1_0	YPK1_0	0	1.224
790	3_D3_YPK1_0	YPK1_0	0	1.224
791	3_E7_FPR1_0	FPR1_0	0	1.1007
792	3_E7_FPR1_0	FPR1_0	0	1.1007
793	3_E9_WT_0	WT_0	0	1.1602
794	3_E9_WT_0	WT_0	0	1.1602
795	3_A10_GCN4_0	GCN4_0	0	0.442
796	3_A10_GCN4_0	GCN4_0	0	0.442
797	3_A6_VAM3_0	VAM3_0	0	0.7055
798	3_A6_VAM3_0	VAM3_0	0	0.7055
799	3_E2_TIP41_0	TIP41_0	0	1.2027
800	3_E2_TIP41_0	TIP41_0	0	1.2027
801	3_B11_DBF2_0	DBF2_0	0	0.00425
802	3_B11_DBF2_0	DBF2_0	0	0.00425
803	3_G3_ARO1_0	ARO1_0	0	1.2197
804	3_G3_ARO1_0	ARO1_0	0	1.2197
805	3_A7_WT_0	WT_0	0	1.1433
806	3_A7_WT_0	WT_0	0	1.1433
807	3_A2_WHI2_0	WHI2_0	0	1.0115
808	3_A2_WHI2_0	WHI2_0	0	1.0115
809	3_H11_SLM4_0	SLM4_0	0	1.0923
810	3_H11_SLM4_0	SLM4_0	0	1.0923
811	3_H1_PBP1_0	PBP1_0	0	1.054
812	3_H1_PBP1_0	PBP1_0	0	1.054
813	3_E5_MEP3_0	MEP3_0	0	1.1687
814	3_E5_MEP3_0	MEP3_0	0	1.1687
815	3_C6_POR1_0	POR1_0	0	0.5185
816	3_C6_POR1_0	POR1_0	0	0.5185
817	3_G5_WT_0	WT_0	0	1.326
818	3_G5_WT_0	WT_0	0	1.326
819	3_D11_WT_0	WT_0	0	1.1263
820	3_D11_WT_0	WT_0	0	1.1263
821	3_H2_MVB12_0	MVB12_0	0	1.0497
822	3_H2_MVB12_0	MVB12_0	0	1.0497
823	3_D6_APE2_0	APE2_0	0	1.2623
824	3_D6_APE2_0	APE2_0	0	1.2623
825	3_F2_SEA4_0	SEA4_0	0	1.071
826	3_F2_SEA4_0	SEA4_0	0	1.071
827	3_C7_APL6_0	APL6_0	0	1.1475
828	3_C7_APL6_0	APL6_0	0	1.1475
829	ctrl_p03_c1	pooled	0	1
830	ctrl_p03_c1	pooled	0	1
831	3_A3_SKO1_0	SKO1_0	0	1.139
832	3_A3_SKO1_0	SKO1_0	0	1.139
833	3_B1_NPR2_0	NPR2_0	0	0.357
834	3_B1_NPR2_0	NPR2_0	0	0.357
835	3_F6_empty3_0	empty3_0	0	0.0085
836	3_F6_empty3_0	empty3_0	0	0.0085
837	3_B5_WT_0	WT_0	0	1.0965
838	3_B5_WT_0	WT_0	0	1.0965
839	3_H7_PSR1_0	PSR1_0	0	1.1433
840	3_H7_PSR1_0	PSR1_0	0	1.1433
841	3_H6_ALY2_0	ALY2_0	0	1.1475
842	3_H6_ALY2_0	ALY2_0	0	1.1475
843	3_A1_NPR1_0	NPR1_0	0	0.5355
844	3_A1_NPR1_0	NPR1_0	0	0.5355
845	3_A8_CPA1_0	CPA1_0	0	0
846	3_A8_CPA1_0	CPA1_0	0	0
847	3_C11_GTR1_0	GTR1_0	0	1.0965
848	3_C11_GTR1_0	GTR1_0	0	1.0965
849	3_A4_ATG40_0	ATG40_0	0	1.1178
850	3_A4_ATG40_0	ATG40_0	0	1.1178
851	3_C3_WT_0	WT_0	0	1.1645
852	3_C3_WT_0	WT_0	0	1.1645
853	3_E6_VPS24_0	VPS24_0	0	0.72675
854	3_E6_VPS24_0	VPS24_0	0	0.72675
855	3_G7_MDS3_0	MDS3_0	0	1.258
856	3_G7_MDS3_0	MDS3_0	0	1.258
857	3_F8_PAR32_0	PAR32_0	0	1.088
858	3_F8_PAR32_0	PAR32_0	0	1.088
859	3_B12_BIT2_0	BIT2_0	0	0
860	3_B12_BIT2_0	BIT2_0	0	0
861	3_H9_BUL1_0	BUL1_0	0	1.2368
862	3_H9_BUL1_0	BUL1_0	0	1.2368
863	3_B4_SLM1_0	SLM1_0	0	1.2325
864	3_B4_SLM1_0	SLM1_0	0	1.2325
865	3_C4_RIM15_0	RIM15_0	0	1.139
866	3_C4_RIM15_0	RIM15_0	0	1.139
867	3_A9_RTG1_0	RTG1_0	0	0
868	3_A9_RTG1_0	RTG1_0	0	0
869	3_E10_AVT4_0	AVT4_0	0	1.1007
870	3_E10_AVT4_0	AVT4_0	0	1.1007
871	3_D9_MEH1_0	MEH1_0	0	1.0328
872	3_D9_MEH1_0	MEH1_0	0	1.0328
873	3_D4_LST4_0	LST4_0	0	1.0795
874	3_D4_LST4_0	LST4_0	0	1.0795
875	3_E4_MSN4_0	MSN4_0	0	1.207
876	3_E4_MSN4_0	MSN4_0	0	1.207
877	3_C8_PKH2_0	PKH2_0	0	1.241
878	3_C8_PKH2_0	PKH2_0	0	1.241
879	3_G12_MEP1_0	MEP1_0	0	0
880	3_G12_MEP1_0	MEP1_0	0	0
881	ctrl_p03_c1	pooled	0	1
882	ctrl_p03_c1	pooled	0	1
883	3_D7_APL2_0	APL2_0	0	0.00425
884	3_D7_APL2_0	APL2_0	0	0.00425
885	3_A11_RRD2_0	RRD2_0	0	0
886	3_A11_RRD2_0	RRD2_0	0	0
887	3_H4_CCR4_0	CCR4_0	0	0.00425
888	3_H4_CCR4_0	CCR4_0	0	0.00425
889	3_G4_CNL1_0	CNL1_0	0	1.2793
890	3_G4_CNL1_0	CNL1_0	0	1.2793
891	3_F4_ATG14_0	ATG14_0	0	1.1943
892	3_F4_ATG14_0	ATG14_0	0	1.1943
893	3_H5_BIT61_0	BIT61_0	0	1.1943
894	3_H5_BIT61_0	BIT61_0	0	1.1943
895	3_C5_SLM2_0	SLM2_0	0	1.2283
896	3_C5_SLM2_0	SLM2_0	0	1.2283
897	3_F5_empty2_0	empty2_0	0	0.017
898	3_F5_empty2_0	empty2_0	0	0.017
899	3_D5_LTV1_0	LTV1_0	0	0.0085
900	3_D5_LTV1_0	LTV1_0	0	0.0085
901	3_B9_GAP1_0	GAP1_0	0	1.3557
902	3_B9_GAP1_0	GAP1_0	0	1.3557
903	3_C12_AGX1_0	AGX1_0	0	1.2325
904	3_C12_AGX1_0	AGX1_0	0	1.2325
905	3_C9_RTC1_0	RTC1_0	0	1.2027
906	3_C9_RTC1_0	RTC1_0	0	1.2027
907	3_F7_WT_0	WT_0	0	1.207
908	3_F7_WT_0	WT_0	0	1.207
909	3_F11_DOA4_0	DOA4_0	0	0.5695
910	3_F11_DOA4_0	DOA4_0	0	0.5695
911	3_H8_PSR2_0	PSR2_0	0	1.0795
912	3_H8_PSR2_0	PSR2_0	0	1.0795
913	3_H10_KSP1_0	KSP1_0	0	0.986
914	3_H10_KSP1_0	KSP1_0	0	0.986
915	3_C2_YPK2_0	YPK2_0	0	1.088
916	3_C2_YPK2_0	YPK2_0	0	1.088
917	3_E3_ATG13_0	ATG13_0	0	1.0667
918	3_E3_ATG13_0	ATG13_0	0	1.0667
919	3_E12_PUT1_0	PUT1_0	0	1.1007
920	3_E12_PUT1_0	PUT1_0	0	1.1007
921	3_F9_VAM6_0	VAM6_0	0	0.391
922	3_F9_VAM6_0	VAM6_0	0	0.391
923	3_E8_STM1_0	STM1_0	0	1.156
924	3_E8_STM1_0	STM1_0	0	1.156
925	3_G11_GTR2_0	GTR2_0	0	1.0115
926	3_G11_GTR2_0	GTR2_0	0	1.0115
927	3_G9_RTG2_0	RTG2_0	0	0.00425
928	3_G9_RTG2_0	RTG2_0	0	0.00425
929	3_G6_PPM1_0	PPM1_0	0	1.2027
930	3_G6_PPM1_0	PPM1_0	0	1.2027
931	3_A5_DDP1_0	DDP1_0	0	1.2538
932	3_A5_DDP1_0	DDP1_0	0	1.2538
933	ctrl_p03_c1	pooled	0	1
934	ctrl_p03_c1	pooled	0	1
935	3_D2_NNK1_0	NNK1_0	0	1.2368
936	3_D2_NNK1_0	NNK1_0	0	1.2368
937	3_D12_CSR1_0	CSR1_0	0	-0.0085
938	3_D12_CSR1_0	CSR1_0	0	-0.0085
939	3_B7_PTC6_0	PTC6_0	0	1.1645
940	3_B7_PTC6_0	PTC6_0	0	1.1645
941	3_F3_RTG3_0	RTG3_0	0	0.01275
942	3_F3_RTG3_0	RTG3_0	0	0.01275
943	3_D10_ATG39_0	ATG39_0	0	1.1985
944	3_D10_ATG39_0	ATG39_0	0	1.1985
945	3_G10_PDE1_0	PDE1_0	0	0.00425
946	3_G10_PDE1_0	PDE1_0	0	0.00425
947	3_E11_RAS2_0	RAS2_0	0	0
948	3_E11_RAS2_0	RAS2_0	0	0
949	3_B6_RRD1_0	RRD1_0	0	1.3642
950	3_B6_RRD1_0	RRD1_0	0	1.3642
951	3_G1_GIS1_0	GIS1_0	0	1.0497
952	3_G1_GIS1_0	GIS1_0	0	1.0497
953	3_C10_GAT1_0	GAT1_0	0	0.00425
954	3_C10_GAT1_0	GAT1_0	0	0.00425
955	3_F10_PPH21_0	PPH21_0	0	1.0157
956	3_F10_PPH21_0	PPH21_0	0	1.0157
957	3_D1_WT_0	WT_0	0	1.003
958	3_D1_WT_0	WT_0	0	1.003
959	3_B3_NPR3_0	NPR3_0	0	1.2708
960	3_B3_NPR3_0	NPR3_0	0	1.2708
961	3_B8_TPD3_0	TPD3_0	0	0.00425
962	3_B8_TPD3_0	TPD3_0	0	0.00425
963	3_C1_MSN2_0	MSN2_0	0	1.0455
964	3_C1_MSN2_0	MSN2_0	0	1.0455
965	3_B10_ORM1_0	ORM1_0	0	0.00425
966	3_B10_ORM1_0	ORM1_0	0	0.00425
967	3_A12_GLN3_0	GLN3_0	0	0.00425
968	3_A12_GLN3_0	GLN3_0	0	0.00425
969	3_F1_PHO85_0	PHO85_0	0	0.02975
970	3_F1_PHO85_0	PHO85_0	0	0.02975
971	3_H12_SIT4_0	SIT4_0	0	0
972	3_H12_SIT4_0	SIT4_0	0	0
973	3_E1_FAP1_0	FAP1_0	0	0.96475
974	3_E1_FAP1_0	FAP1_0	0	0.96475
975	ctrl_p03_c1	pooled	0	1
976	ctrl_p03_c1	pooled	0	1
977	ctrl_p04_c1	pooled	0	1
978	ctrl_p04_c1	pooled	0	1
979	4_G5_WT_0	WT_0	0	1.3345
980	4_G5_WT_0	WT_0	0	1.3345
981	4_C8_PKH2_0	PKH2_0	0	1.2453
982	4_C8_PKH2_0	PKH2_0	0	1.2453
983	4_A1_NPR1_0	NPR1_0	0	0.58225
984	4_A1_NPR1_0	NPR1_0	0	0.58225
985	4_H5_BIT61_0	BIT61_0	0	1.1985
986	4_H5_BIT61_0	BIT61_0	0	1.1985
987	4_C4_RIM15_0	RIM15_0	0	1.156
988	4_C4_RIM15_0	RIM15_0	0	1.156
989	4_H11_SLM4_0	SLM4_0	0	1.0923
990	4_H11_SLM4_0	SLM4_0	0	1.0923
991	4_A10_GCN4_0	GCN4_0	0	0.493
992	4_A10_GCN4_0	GCN4_0	0	0.493
993	4_B1_NPR2_0	NPR2_0	0	0.21675
994	4_B1_NPR2_0	NPR2_0	0	0.21675
995	4_C10_GAT1_0	GAT1_0	0	0
996	4_C10_GAT1_0	GAT1_0	0	0
997	4_E1_FAP1_0	FAP1_0	0	0.95625
998	4_E1_FAP1_0	FAP1_0	0	0.95625
999	4_E6_VPS24_0	VPS24_0	0	0.816
1000	4_E6_VPS24_0	VPS24_0	0	0.816
1001	4_C5_SLM2_0	SLM2_0	0	1.2113
1002	4_C5_SLM2_0	SLM2_0	0	1.2113
1003	4_B10_ORM1_0	ORM1_0	0	0
1004	4_B10_ORM1_0	ORM1_0	0	0
1005	4_C1_MSN2_0	MSN2_0	0	1.1305
1006	4_C1_MSN2_0	MSN2_0	0	1.1305
1007	4_E12_PUT1_0	PUT1_0	0	1.1985
1008	4_E12_PUT1_0	PUT1_0	0	1.1985
1009	4_G12_MEP1_0	MEP1_0	0	0.00425
1010	4_G12_MEP1_0	MEP1_0	0	0.00425
1011	4_A12_GLN3_0	GLN3_0	0	0.00425
1012	4_A12_GLN3_0	GLN3_0	0	0.00425
1013	4_D10_ATG39_0	ATG39_0	0	1.224
1014	4_D10_ATG39_0	ATG39_0	0	1.224
1015	4_G10_PDE1_0	PDE1_0	0	0.00425
1016	4_G10_PDE1_0	PDE1_0	0	0.00425
1017	4_C7_APL6_0	APL6_0	0	1.105
1018	4_C7_APL6_0	APL6_0	0	1.105
1019	4_H2_MVB12_0	MVB12_0	0	1.2155
1020	4_H2_MVB12_0	MVB12_0	0	1.2155
1021	4_B6_RRD1_0	RRD1_0	0	1.3472
1022	4_B6_RRD1_0	RRD1_0	0	1.3472
1023	4_D11_WT_0	WT_0	0	1.1347
1024	4_D11_WT_0	WT_0	0	1.1347
1025	4_F2_SEA4_0	SEA4_0	0	1.2283
1026	4_F2_SEA4_0	SEA4_0	0	1.2283
1027	4_A3_SKO1_0	SKO1_0	0	0.9775
1028	4_A3_SKO1_0	SKO1_0	0	0.9775
1029	ctrl_p04_c1	pooled	0	1
1030	ctrl_p04_c1	pooled	0	1
1031	4_A8_CPA1_0	CPA1_0	0	0.00425
1032	4_A8_CPA1_0	CPA1_0	0	0.00425
1033	4_G11_GTR2_0	GTR2_0	0	1.054
1034	4_G11_GTR2_0	GTR2_0	0	1.054
1035	4_D7_APL2_0	APL2_0	0	0.0085
1036	4_D7_APL2_0	APL2_0	0	0.0085
1037	4_H6_ALY2_0	ALY2_0	0	1.2495
1038	4_H6_ALY2_0	ALY2_0	0	1.2495
1039	4_C11_GTR1_0	GTR1_0	0	1.0753
1040	4_C11_GTR1_0	GTR1_0	0	1.0753
1041	4_C2_YPK2_0	YPK2_0	0	1.139
1042	4_C2_YPK2_0	YPK2_0	0	1.139
1043	4_G3_ARO1_0	ARO1_0	0	0.93925
1044	4_G3_ARO1_0	ARO1_0	0	0.93925
1045	4_A5_DDP1_0	DDP1_0	0	1.224
1046	4_A5_DDP1_0	DDP1_0	0	1.224
1047	4_G1_GIS1_0	GIS1_0	0	1.207
1048	4_G1_GIS1_0	GIS1_0	0	1.207
1049	4_H3_WT_0	WT_0	0	0.94775
1050	4_H3_WT_0	WT_0	0	0.94775
1051	4_A2_WHI2_0	WHI2_0	0	1.1263
1052	4_A2_WHI2_0	WHI2_0	0	1.1263
1053	4_F6_empty3_0	empty3_0	0	0.0085
1054	4_F6_empty3_0	empty3_0	0	0.0085
1055	4_D8_ALY1_0	ALY1_0	0	1.0965
1056	4_D8_ALY1_0	ALY1_0	0	1.0965
1057	4_C6_POR1_0	POR1_0	0	0.476
1058	4_C6_POR1_0	POR1_0	0	0.476
1059	4_G2_MTC5_0	MTC5_0	0	1.2963
1060	4_G2_MTC5_0	MTC5_0	0	1.2963
1061	4_G6_PPM1_0	PPM1_0	0	1.19
1062	4_G6_PPM1_0	PPM1_0	0	1.19
1063	4_C9_RTC1_0	RTC1_0	0	1.2453
1064	4_C9_RTC1_0	RTC1_0	0	1.2453
1065	4_D12_CSR1_0	CSR1_0	0	-0.00425
1066	4_D12_CSR1_0	CSR1_0	0	-0.00425
1067	4_F1_PHO85_0	PHO85_0	0	0.017
1068	4_F1_PHO85_0	PHO85_0	0	0.017
1069	4_H8_PSR2_0	PSR2_0	0	1.122
1070	4_H8_PSR2_0	PSR2_0	0	1.122
1071	4_C3_WT_0	WT_0	0	0.799
1072	4_C3_WT_0	WT_0	0	0.799
1073	4_G4_CNL1_0	CNL1_0	0	1.309
1074	4_G4_CNL1_0	CNL1_0	0	1.309
1075	4_D6_APE2_0	APE2_0	0	1.2835
1076	4_D6_APE2_0	APE2_0	0	1.2835
1077	4_D5_LTV1_0	LTV1_0	0	0.0085
1078	4_D5_LTV1_0	LTV1_0	0	0.0085
1079	4_D9_MEH1_0	MEH1_0	0	1.1305
1080	4_D9_MEH1_0	MEH1_0	0	1.1305
1081	ctrl_p04_c1	pooled	0	1
1082	ctrl_p04_c1	pooled	0	1
1083	4_A6_VAM3_0	VAM3_0	0	0.68425
1084	4_A6_VAM3_0	VAM3_0	0	0.68425
1085	4_G8_LST7_0	LST7_0	0	0.0085
1086	4_G8_LST7_0	LST7_0	0	0.0085
1087	4_B7_PTC6_0	PTC6_0	0	1.1687
1088	4_B7_PTC6_0	PTC6_0	0	1.1687
1089	4_C12_AGX1_0	AGX1_0	0	1.1475
1090	4_C12_AGX1_0	AGX1_0	0	1.1475
1091	4_F11_DOA4_0	DOA4_0	0	0.56525
1092	4_F11_DOA4_0	DOA4_0	0	0.56525
1093	4_E3_ATG13_0	ATG13_0	0	0.84575
1094	4_E3_ATG13_0	ATG13_0	0	0.84575
1095	4_A11_RRD2_0	RRD2_0	0	0.00425
1096	4_A11_RRD2_0	RRD2_0	0	0.00425
1097	4_F4_ATG14_0	ATG14_0	0	1.2495
1098	4_F4_ATG14_0	ATG14_0	0	1.2495
1099	4_F10_PPH21_0	PPH21_0	0	1.0413
1100	4_F10_PPH21_0	PPH21_0	0	1.0413
1101	4_H12_SIT4_0	SIT4_0	0	0
1102	4_H12_SIT4_0	SIT4_0	0	0
1103	4_E2_TIP41_0	TIP41_0	0	1.343
1104	4_E2_TIP41_0	TIP41_0	0	1.343
1105	4_E8_STM1_0	STM1_0	0	1.326
1106	4_E8_STM1_0	STM1_0	0	1.326
1107	4_H4_CCR4_0	CCR4_0	0	0.0085
1108	4_H4_CCR4_0	CCR4_0	0	0.0085
1109	4_D1_WT_0	WT_0	0	1.1943
1110	4_D1_WT_0	WT_0	0	1.1943
1111	4_H7_PSR1_0	PSR1_0	0	1.105
1112	4_H7_PSR1_0	PSR1_0	0	1.105
1113	4_F7_WT_0	WT_0	0	1.2708
1114	4_F7_WT_0	WT_0	0	1.2708
1115	4_F5_empty2_0	empty2_0	0	0.01275
1116	4_F5_empty2_0	empty2_0	0	0.01275
1117	4_F12_BMH2_0	BMH2_0	0	1.2027
1118	4_F12_BMH2_0	BMH2_0	0	1.2027
1119	4_G9_RTG2_0	RTG2_0	0	0.00425
1120	4_G9_RTG2_0	RTG2_0	0	0.00425
1121	4_E9_WT_0	WT_0	0	1.3132
1122	4_E9_WT_0	WT_0	0	1.3132
1123	4_A9_RTG1_0	RTG1_0	0	0.00425
1124	4_A9_RTG1_0	RTG1_0	0	0.00425
1125	4_D3_YPK1_0	YPK1_0	0	0.9605
1126	4_D3_YPK1_0	YPK1_0	0	0.9605
1127	4_G7_MDS3_0	MDS3_0	0	1.173
1128	4_G7_MDS3_0	MDS3_0	0	1.173
1129	4_D2_NNK1_0	NNK1_0	0	1.3133
1130	4_D2_NNK1_0	NNK1_0	0	1.3133
1131	4_H1_PBP1_0	PBP1_0	0	1.275
1132	4_H1_PBP1_0	PBP1_0	0	1.275
1133	ctrl_p04_c1	pooled	0	1
1134	ctrl_p04_c1	pooled	0	1
1135	4_E11_RAS2_0	RAS2_0	0	0.0085
1136	4_E11_RAS2_0	RAS2_0	0	0.0085
1137	4_F9_VAM6_0	VAM6_0	0	0.4165
1138	4_F9_VAM6_0	VAM6_0	0	0.4165
1139	4_A4_ATG40_0	ATG40_0	0	1.207
1140	4_A4_ATG40_0	ATG40_0	0	1.207
1141	4_E5_MEP3_0	MEP3_0	0	1.275
1142	4_E5_MEP3_0	MEP3_0	0	1.275
1143	4_B9_GAP1_0	GAP1_0	0	1.3387
1144	4_B9_GAP1_0	GAP1_0	0	1.3387
1145	4_B5_WT_0	WT_0	0	1.0837
1146	4_B5_WT_0	WT_0	0	1.0837
1147	4_H9_BUL1_0	BUL1_0	0	1.2665
1148	4_H9_BUL1_0	BUL1_0	0	1.2665
1149	4_B12_BIT2_0	BIT2_0	0	0.00425
1150	4_B12_BIT2_0	BIT2_0	0	0.00425
1151	4_E4_MSN4_0	MSN4_0	0	1.3472
1152	4_E4_MSN4_0	MSN4_0	0	1.3472
1153	4_E7_FPR1_0	FPR1_0	0	1.173
1154	4_E7_FPR1_0	FPR1_0	0	1.173
1155	4_B11_DBF2_0	DBF2_0	0	0.00425
1156	4_B11_DBF2_0	DBF2_0	0	0.00425
1157	4_E10_AVT4_0	AVT4_0	0	1.2198
1158	4_E10_AVT4_0	AVT4_0	0	1.2198
1159	4_B3_NPR3_0	NPR3_0	0	0.89675
1160	4_B3_NPR3_0	NPR3_0	0	0.89675
1161	4_D4_LST4_0	LST4_0	0	1.1007
1162	4_D4_LST4_0	LST4_0	0	1.1007
1163	4_B4_SLM1_0	SLM1_0	0	1.2665
1164	4_B4_SLM1_0	SLM1_0	0	1.2665
1165	4_B8_TPD3_0	TPD3_0	0	0
1166	4_B8_TPD3_0	TPD3_0	0	0
1167	4_A7_WT_0	WT_0	0	1.0497
1168	4_A7_WT_0	WT_0	0	1.0497
1169	4_F8_PAR32_0	PAR32_0	0	1.2495
1170	4_F8_PAR32_0	PAR32_0	0	1.2495
1171	4_F3_RTG3_0	RTG3_0	0	0.017
1172	4_F3_RTG3_0	RTG3_0	0	0.017
1173	4_H10_KSP1_0	KSP1_0	0	1.0753
1174	4_H10_KSP1_0	KSP1_0	0	1.0753
1175	ctrl_p04_c1	pooled	0	1
1176	ctrl_p04_c1	pooled	0	1
1177	ctrl_p05_c1	pooled	0	1
1178	ctrl_p05_c1	pooled	0	1
1179	5_A2_WHI2_5	WHI2_5	5	1.1934
1180	5_A2_WHI2_5	WHI2_5	5	1.1934
1181	5_F7_WT_5	WT_5	5	1.2527
1182	5_F7_WT_5	WT_5	5	1.2527
1183	5_E5_MEP3_5	MEP3_5	5	1.3986
1184	5_E5_MEP3_5	MEP3_5	5	1.3986
1185	5_D5_LTV1_5	LTV1_5	5	0.00425
1186	5_D5_LTV1_5	LTV1_5	5	0.00425
1187	5_D8_ALY1_5	ALY1_5	5	1.138
1188	5_D8_ALY1_5	ALY1_5	5	1.138
1189	5_A11_RRD2_5	RRD2_5	5	0.018809
1190	5_A11_RRD2_5	RRD2_5	5	0.018809
1191	5_D4_LST4_5	LST4_5	5	1.1522
1192	5_D4_LST4_5	LST4_5	5	1.1522
1193	5_G4_CNL1_5	CNL1_5	5	1.194
1194	5_G4_CNL1_5	CNL1_5	5	1.194
1195	5_C12_AGX1_5	AGX1_5	5	1.273
1196	5_C12_AGX1_5	AGX1_5	5	1.273
1197	5_E1_FAP1_5	FAP1_5	5	1.0139
1198	5_E1_FAP1_5	FAP1_5	5	1.0139
1199	5_D9_MEH1_5	MEH1_5	5	1.1003
1200	5_D9_MEH1_5	MEH1_5	5	1.1003
1201	5_B11_DBF2_5	DBF2_5	5	0.0055621
1202	5_B11_DBF2_5	DBF2_5	5	0.0055621
1203	5_F1_PHO85_5	PHO85_5	5	0.00425
1204	5_F1_PHO85_5	PHO85_5	5	0.00425
1205	5_A3_SKO1_5	SKO1_5	5	1.2877
1206	5_A3_SKO1_5	SKO1_5	5	1.2877
1207	5_H12_SIT4_5	SIT4_5	5	0.018809
1208	5_H12_SIT4_5	SIT4_5	5	0.018809
1209	5_H6_ALY2_5	ALY2_5	5	1.3888
1210	5_H6_ALY2_5	ALY2_5	5	1.3888
1211	5_A1_NPR1_5	NPR1_5	5	0.60167
1212	5_A1_NPR1_5	NPR1_5	5	0.60167
1213	5_B7_PTC6_5	PTC6_5	5	1.151
1214	5_B7_PTC6_5	PTC6_5	5	1.151
1215	5_G3_ARO1_5	ARO1_5	5	1.3632
1216	5_G3_ARO1_5	ARO1_5	5	1.3632
1217	5_C7_APL6_5	APL6_5	5	1.1892
1218	5_C7_APL6_5	APL6_5	5	1.1892
1219	5_D1_WT_5	WT_5	5	1.1082
1220	5_D1_WT_5	WT_5	5	1.1082
1221	5_H11_SLM4_5	SLM4_5	5	1.2263
1222	5_H11_SLM4_5	SLM4_5	5	1.2263
1223	5_G5_WT_5	WT_5	5	1.4075
1224	5_G5_WT_5	WT_5	5	1.4075
1225	5_D11_WT_5	WT_5	5	1.278
1226	5_D11_WT_5	WT_5	5	1.278
1227	5_H4_CCR4_5	CCR4_5	5	0.00425
1228	5_H4_CCR4_5	CCR4_5	5	0.00425
1229	ctrl_p05_c1	pooled	0	1
1230	ctrl_p05_c1	pooled	0	1
1231	5_D2_NNK1_5	NNK1_5	5	1.3519
1232	5_D2_NNK1_5	NNK1_5	5	1.3519
1233	5_D10_ATG39_5	ATG39_5	5	1.3175
1234	5_D10_ATG39_5	ATG39_5	5	1.3175
1235	5_C10_GAT1_5	GAT1_5	5	0.19615
1236	5_C10_GAT1_5	GAT1_5	5	0.19615
1237	5_E3_ATG13_5	ATG13_5	5	1.2831
1238	5_E3_ATG13_5	ATG13_5	5	1.2831
1239	5_B10_ORM1_5	ORM1_5	5	0.34835
1240	5_B10_ORM1_5	ORM1_5	5	0.34835
1241	5_C3_WT_5	WT_5	5	1.0861
1242	5_C3_WT_5	WT_5	5	1.0861
1243	5_H9_BUL1_5	BUL1_5	5	1.3827
1244	5_H9_BUL1_5	BUL1_5	5	1.3827
1245	5_H2_MVB12_5	MVB12_5	5	1.2659
1246	5_H2_MVB12_5	MVB12_5	5	1.2659
1247	5_F10_PPH21_5	PPH21_5	5	1.0866
1248	5_F10_PPH21_5	PPH21_5	5	1.0866
1249	5_C1_MSN2_5	MSN2_5	5	1.0823
1250	5_C1_MSN2_5	MSN2_5	5	1.0823
1251	5_A4_ATG40_5	ATG40_5	5	1.3003
1252	5_A4_ATG40_5	ATG40_5	5	1.3003
1253	5_H3_WT_5	WT_5	5	1.4474
1254	5_H3_WT_5	WT_5	5	1.4474
1255	5_G2_MTC5_5	MTC5_5	5	1.3316
1256	5_G2_MTC5_5	MTC5_5	5	1.3316
1257	5_G10_PDE1_5	PDE1_5	5	0.19615
1258	5_G10_PDE1_5	PDE1_5	5	0.19615
1259	5_H8_PSR2_5	PSR2_5	5	1.252
1260	5_H8_PSR2_5	PSR2_5	5	1.252
1261	5_E4_MSN4_5	MSN4_5	5	1.4246
1262	5_E4_MSN4_5	MSN4_5	5	1.4246
1263	5_B3_NPR3_5	NPR3_5	5	1.2633
1264	5_B3_NPR3_5	NPR3_5	5	1.2633
1265	5_F5_empty2_5	empty2_5	5	0.0085
1266	5_F5_empty2_5	empty2_5	5	0.0085
1267	5_C11_GTR1_5	GTR1_5	5	1.0894
1268	5_C11_GTR1_5	GTR1_5	5	1.0894
1269	5_A12_GLN3_5	GLN3_5	5	0.00425
1270	5_A12_GLN3_5	GLN3_5	5	0.00425
1271	5_D12_CSR1_5	CSR1_5	5	0.19615
1272	5_D12_CSR1_5	CSR1_5	5	0.19615
1273	5_C9_RTC1_5	RTC1_5	5	1.2906
1274	5_C9_RTC1_5	RTC1_5	5	1.2906
1275	5_C4_RIM15_5	RIM15_5	5	1.2421
1276	5_C4_RIM15_5	RIM15_5	5	1.2421
1277	5_E12_PUT1_5	PUT1_5	5	1.2852
1278	5_E12_PUT1_5	PUT1_5	5	1.2852
1279	5_A9_RTG1_5	RTG1_5	5	0.00425
1280	5_A9_RTG1_5	RTG1_5	5	0.00425
1281	ctrl_p05_c1	pooled	0	1
1282	ctrl_p05_c1	pooled	0	1
1283	5_B8_TPD3_5	TPD3_5	5	0.00425
1284	5_B8_TPD3_5	TPD3_5	5	0.00425
1285	5_B1_NPR2_5	NPR2_5	5	0.41088
1286	5_B1_NPR2_5	NPR2_5	5	0.41088
1287	5_D6_APE2_5	APE2_5	5	1.3802
1288	5_D6_APE2_5	APE2_5	5	1.3802
1289	5_B9_GAP1_5	GAP1_5	5	0.066012
1290	5_B9_GAP1_5	GAP1_5	5	0.066012
1291	5_E7_FPR1_5	FPR1_5	5	1.2529
1292	5_E7_FPR1_5	FPR1_5	5	1.2529
1293	5_C8_PKH2_5	PKH2_5	5	1.3262
1294	5_C8_PKH2_5	PKH2_5	5	1.3262
1295	5_E6_VPS24_5	VPS24_5	5	0.86122
1296	5_E6_VPS24_5	VPS24_5	5	0.86122
1297	5_F4_ATG14_5	ATG14_5	5	1.3219
1298	5_F4_ATG14_5	ATG14_5	5	1.3219
1299	5_G8_LST7_5	LST7_5	5	0.0085
1300	5_G8_LST7_5	LST7_5	5	0.0085
1301	5_B4_SLM1_5	SLM1_5	5	1.2967
1302	5_B4_SLM1_5	SLM1_5	5	1.2967
1303	5_H5_BIT61_5	BIT61_5	5	1.396
1304	5_H5_BIT61_5	BIT61_5	5	1.396
1305	5_B5_WT_5	WT_5	5	1.2934
1306	5_B5_WT_5	WT_5	5	1.2934
1307	5_F11_DOA4_5	DOA4_5	5	0.63131
1308	5_F11_DOA4_5	DOA4_5	5	0.63131
1309	5_E9_WT_5	WT_5	5	1.3801
1310	5_E9_WT_5	WT_5	5	1.3801
1311	5_F6_empty3_5	empty3_5	5	0.00425
1312	5_F6_empty3_5	empty3_5	5	0.00425
1313	5_F9_VAM6_5	VAM6_5	5	0.46396
1314	5_F9_VAM6_5	VAM6_5	5	0.46396
1315	5_H10_KSP1_5	KSP1_5	5	1.2024
1316	5_H10_KSP1_5	KSP1_5	5	1.2024
1317	5_F12_BMH2_5	BMH2_5	5	1.2556
1318	5_F12_BMH2_5	BMH2_5	5	1.2556
1319	5_A7_WT_5	WT_5	5	1.172
1320	5_A7_WT_5	WT_5	5	1.172
1321	5_H1_PBP1_5	PBP1_5	5	1.3258
1322	5_H1_PBP1_5	PBP1_5	5	1.3258
1323	5_B12_BIT2_5	BIT2_5	5	0.04432
1324	5_B12_BIT2_5	BIT2_5	5	0.04432
1325	5_B6_RRD1_5	RRD1_5	5	0.84496
1326	5_B6_RRD1_5	RRD1_5	5	0.84496
1327	5_G9_RTG2_5	RTG2_5	5	0.0064948
1328	5_G9_RTG2_5	RTG2_5	5	0.0064948
1329	5_E8_STM1_5	STM1_5	5	1.3804
1330	5_E8_STM1_5	STM1_5	5	1.3804
1331	5_F8_PAR32_5	PAR32_5	5	1.2954
1332	5_F8_PAR32_5	PAR32_5	5	1.2954
1333	ctrl_p05_c1	pooled	0	1
1334	ctrl_p05_c1	pooled	0	1
1335	5_E11_RAS2_5	RAS2_5	5	0.018809
1336	5_E11_RAS2_5	RAS2_5	5	0.018809
1337	5_E10_AVT4_5	AVT4_5	5	1.288
1338	5_E10_AVT4_5	AVT4_5	5	1.288
1339	5_D7_APL2_5	APL2_5	5	0.018809
1340	5_D7_APL2_5	APL2_5	5	0.018809
1341	5_A5_DDP1_5	DDP1_5	5	1.3731
1342	5_A5_DDP1_5	DDP1_5	5	1.3731
1343	5_A10_GCN4_5	GCN4_5	5	0.59174
1344	5_A10_GCN4_5	GCN4_5	5	0.59174
1345	5_C5_SLM2_5	SLM2_5	5	1.3145
1346	5_C5_SLM2_5	SLM2_5	5	1.3145
1347	5_C2_YPK2_5	YPK2_5	5	1.0942
1348	5_C2_YPK2_5	YPK2_5	5	1.0942
1349	5_D3_YPK1_5	YPK1_5	5	1.3547
1350	5_D3_YPK1_5	YPK1_5	5	1.3547
1351	5_A6_VAM3_5	VAM3_5	5	0.63189
1352	5_A6_VAM3_5	VAM3_5	5	0.63189
1353	5_F2_SEA4_5	SEA4_5	5	1.259
1354	5_F2_SEA4_5	SEA4_5	5	1.259
1355	5_G11_GTR2_5	GTR2_5	5	1.0251
1356	5_G11_GTR2_5	GTR2_5	5	1.0251
1357	5_F3_RTG3_5	RTG3_5	5	0.01275
1358	5_F3_RTG3_5	RTG3_5	5	0.01275
1359	5_G6_PPM1_5	PPM1_5	5	1.2685
1360	5_G6_PPM1_5	PPM1_5	5	1.2685
1361	5_A8_CPA1_5	CPA1_5	5	0.0064948
1362	5_A8_CPA1_5	CPA1_5	5	0.0064948
1363	5_G1_GIS1_5	GIS1_5	5	1.2547
1364	5_G1_GIS1_5	GIS1_5	5	1.2547
1365	5_H7_PSR1_5	PSR1_5	5	1.2323
1366	5_H7_PSR1_5	PSR1_5	5	1.2323
1367	5_E2_TIP41_5	TIP41_5	5	1.4061
1368	5_E2_TIP41_5	TIP41_5	5	1.4061
1369	5_C6_POR1_5	POR1_5	5	0.53098
1370	5_C6_POR1_5	POR1_5	5	0.53098
1371	5_G12_MEP1_5	MEP1_5	5	0.036838
1372	5_G12_MEP1_5	MEP1_5	5	0.036838
1373	5_G7_MDS3_5	MDS3_5	5	1.276
1374	5_G7_MDS3_5	MDS3_5	5	1.276
1375	ctrl_p05_c1	pooled	0	1
1376	ctrl_p05_c1	pooled	0	1
1377	ctrl_p06_c1	pooled	0	1
1378	ctrl_p06_c1	pooled	0	1
1379	6_A6_VAM3_5	VAM3_5	5	0.76855
1380	6_A6_VAM3_5	VAM3_5	5	0.76855
1381	6_H6_ALY2_5	ALY2_5	5	1.3577
1382	6_H6_ALY2_5	ALY2_5	5	1.3577
1383	6_F3_RTG3_5	RTG3_5	5	0.01275
1384	6_F3_RTG3_5	RTG3_5	5	0.01275
1385	6_A1_NPR1_5	NPR1_5	5	0.61335
1386	6_A1_NPR1_5	NPR1_5	5	0.61335
1387	6_C4_RIM15_5	RIM15_5	5	1.2914
1388	6_C4_RIM15_5	RIM15_5	5	1.2914
1389	6_A3_SKO1_5	SKO1_5	5	1.2909
1390	6_A3_SKO1_5	SKO1_5	5	1.2909
1391	6_B7_PTC6_5	PTC6_5	5	1.2121
1392	6_B7_PTC6_5	PTC6_5	5	1.2121
1393	6_A9_RTG1_5	RTG1_5	5	0.017138
1394	6_A9_RTG1_5	RTG1_5	5	0.017138
1395	6_F11_DOA4_5	DOA4_5	5	0.66597
1396	6_F11_DOA4_5	DOA4_5	5	0.66597
1397	6_E7_FPR1_5	FPR1_5	5	1.2913
1398	6_E7_FPR1_5	FPR1_5	5	1.2913
1399	6_B12_BIT2_5	BIT2_5	5	0.19615
1400	6_B12_BIT2_5	BIT2_5	5	0.19615
1401	6_D9_MEH1_5	MEH1_5	5	1.1909
1402	6_D9_MEH1_5	MEH1_5	5	1.1909
1403	6_B6_RRD1_5	RRD1_5	5	1.4314
1404	6_B6_RRD1_5	RRD1_5	5	1.4314
1405	6_H9_BUL1_5	BUL1_5	5	1.3632
1406	6_H9_BUL1_5	BUL1_5	5	1.3632
1407	6_B8_TPD3_5	TPD3_5	5	0.017138
1408	6_B8_TPD3_5	TPD3_5	5	0.017138
1409	6_F2_SEA4_5	SEA4_5	5	1.3388
1410	6_F2_SEA4_5	SEA4_5	5	1.3388
1411	6_C10_GAT1_5	GAT1_5	5	0.19615
1412	6_C10_GAT1_5	GAT1_5	5	0.19615
1413	6_A8_CPA1_5	CPA1_5	5	0.00425
1414	6_A8_CPA1_5	CPA1_5	5	0.00425
1415	6_G8_LST7_5	LST7_5	5	0.0085
1416	6_G8_LST7_5	LST7_5	5	0.0085
1417	6_G4_CNL1_5	CNL1_5	5	1.3419
1418	6_G4_CNL1_5	CNL1_5	5	1.3419
1419	6_H5_BIT61_5	BIT61_5	5	1.3492
1420	6_H5_BIT61_5	BIT61_5	5	1.3492
1421	6_F8_PAR32_5	PAR32_5	5	1.2747
1422	6_F8_PAR32_5	PAR32_5	5	1.2747
1423	6_G10_PDE1_5	PDE1_5	5	0.19615
1424	6_G10_PDE1_5	PDE1_5	5	0.19615
1425	6_C1_MSN2_5	MSN2_5	5	1.0973
1426	6_C1_MSN2_5	MSN2_5	5	1.0973
1427	6_C11_GTR1_5	GTR1_5	5	1.1749
1428	6_C11_GTR1_5	GTR1_5	5	1.1749
1429	ctrl_p06_c1	pooled	0	1
1430	ctrl_p06_c1	pooled	0	1
1431	6_D2_NNK1_5	NNK1_5	5	1.3453
1432	6_D2_NNK1_5	NNK1_5	5	1.3453
1433	6_E2_TIP41_5	TIP41_5	5	1.3848
1434	6_E2_TIP41_5	TIP41_5	5	1.3848
1435	6_E10_AVT4_5	AVT4_5	5	1.2462
1436	6_E10_AVT4_5	AVT4_5	5	1.2462
1437	6_F7_WT_5	WT_5	5	1.2864
1438	6_F7_WT_5	WT_5	5	1.2864
1439	6_H4_CCR4_5	CCR4_5	5	0.00425
1440	6_H4_CCR4_5	CCR4_5	5	0.00425
1441	6_E11_RAS2_5	RAS2_5	5	0.00425
1442	6_E11_RAS2_5	RAS2_5	5	0.00425
1443	6_F6_empty3_5	empty3_5	5	0.0066051
1444	6_F6_empty3_5	empty3_5	5	0.0066051
1445	6_E9_WT_5	WT_5	5	1.3265
1446	6_E9_WT_5	WT_5	5	1.3265
1447	6_D7_APL2_5	APL2_5	5	0.00425
1448	6_D7_APL2_5	APL2_5	5	0.00425
1449	6_G12_MEP1_5	MEP1_5	5	0.19615
1450	6_G12_MEP1_5	MEP1_5	5	0.19615
1451	6_B3_NPR3_5	NPR3_5	5	1.275
1452	6_B3_NPR3_5	NPR3_5	5	1.275
1453	6_F12_BMH2_5	BMH2_5	5	1.2475
1454	6_F12_BMH2_5	BMH2_5	5	1.2475
1455	6_G3_ARO1_5	ARO1_5	5	1.4289
1456	6_G3_ARO1_5	ARO1_5	5	1.4289
1457	6_C5_SLM2_5	SLM2_5	5	1.2939
1458	6_C5_SLM2_5	SLM2_5	5	1.2939
1459	6_F1_PHO85_5	PHO85_5	5	0.00425
1460	6_F1_PHO85_5	PHO85_5	5	0.00425
1461	6_H10_KSP1_5	KSP1_5	5	1.1294
1462	6_H10_KSP1_5	KSP1_5	5	1.1294
1463	6_D5_LTV1_5	LTV1_5	5	0.0085
1464	6_D5_LTV1_5	LTV1_5	5	0.0085
1465	6_B9_GAP1_5	GAP1_5	5	1.3177
1466	6_B9_GAP1_5	GAP1_5	5	1.3177
1467	6_E12_PUT1_5	PUT1_5	5	1.2278
1468	6_E12_PUT1_5	PUT1_5	5	1.2278
1469	6_E3_ATG13_5	ATG13_5	5	1.2803
1470	6_E3_ATG13_5	ATG13_5	5	1.2803
1471	6_B10_ORM1_5	ORM1_5	5	0.19615
1472	6_B10_ORM1_5	ORM1_5	5	0.19615
1473	6_D1_WT_5	WT_5	5	1.095
1474	6_D1_WT_5	WT_5	5	1.095
1475	6_A5_DDP1_5	DDP1_5	5	1.2583
1476	6_A5_DDP1_5	DDP1_5	5	1.2583
1477	6_G2_MTC5_5	MTC5_5	5	1.3748
1478	6_G2_MTC5_5	MTC5_5	5	1.3748
1479	6_B1_NPR2_5	NPR2_5	5	0.23638
1480	6_B1_NPR2_5	NPR2_5	5	0.23638
1481	ctrl_p06_c1	pooled	0	1
1482	ctrl_p06_c1	pooled	0	1
1483	6_B11_DBF2_5	DBF2_5	5	0.00425
1484	6_B11_DBF2_5	DBF2_5	5	0.00425
1485	6_C3_WT_5	WT_5	5	1.1774
1486	6_C3_WT_5	WT_5	5	1.1774
1487	6_F10_PPH21_5	PPH21_5	5	1.024
1488	6_F10_PPH21_5	PPH21_5	5	1.024
1489	6_E6_VPS24_5	VPS24_5	5	0.8332
1490	6_E6_VPS24_5	VPS24_5	5	0.8332
1491	6_H8_PSR2_5	PSR2_5	5	1.2205
1492	6_H8_PSR2_5	PSR2_5	5	1.2205
1493	6_D11_WT_5	WT_5	5	1.2879
1494	6_D11_WT_5	WT_5	5	1.2879
1495	6_G6_PPM1_5	PPM1_5	5	1.314
1496	6_G6_PPM1_5	PPM1_5	5	1.314
1497	6_G11_GTR2_5	GTR2_5	5	1.0603
1498	6_G11_GTR2_5	GTR2_5	5	1.0603
1499	6_G1_GIS1_5	GIS1_5	5	1.3286
1500	6_G1_GIS1_5	GIS1_5	5	1.3286
1501	6_D12_CSR1_5	CSR1_5	5	0.19615
1502	6_D12_CSR1_5	CSR1_5	5	0.19615
1503	6_E1_FAP1_5	FAP1_5	5	1.0185
1504	6_E1_FAP1_5	FAP1_5	5	1.0185
1505	6_C9_RTC1_5	RTC1_5	5	1.3013
1506	6_C9_RTC1_5	RTC1_5	5	1.3013
1507	6_C12_AGX1_5	AGX1_5	5	1.2199
1508	6_C12_AGX1_5	AGX1_5	5	1.2199
1509	6_D10_ATG39_5	ATG39_5	5	1.3529
1510	6_D10_ATG39_5	ATG39_5	5	1.3529
1511	6_C2_YPK2_5	YPK2_5	5	1.1553
1512	6_C2_YPK2_5	YPK2_5	5	1.1553
1513	6_C6_POR1_5	POR1_5	5	0.62256
1514	6_C6_POR1_5	POR1_5	5	0.62256
1515	6_E4_MSN4_5	MSN4_5	5	1.374
1516	6_E4_MSN4_5	MSN4_5	5	1.374
1517	6_A10_GCN4_5	GCN4_5	5	0.56475
1518	6_A10_GCN4_5	GCN4_5	5	0.56475
1519	6_F4_ATG14_5	ATG14_5	5	1.323
1520	6_F4_ATG14_5	ATG14_5	5	1.323
1521	6_A11_RRD2_5	RRD2_5	5	0.017138
1522	6_A11_RRD2_5	RRD2_5	5	0.017138
1523	6_F5_empty2_5	empty2_5	5	0.011001
1524	6_F5_empty2_5	empty2_5	5	0.011001
1525	6_D3_YPK1_5	YPK1_5	5	1.3516
1526	6_D3_YPK1_5	YPK1_5	5	1.3516
1527	6_D4_LST4_5	LST4_5	5	1.1445
1528	6_D4_LST4_5	LST4_5	5	1.1445
1529	6_D8_ALY1_5	ALY1_5	5	1.1334
1530	6_D8_ALY1_5	ALY1_5	5	1.1334
1531	6_D6_APE2_5	APE2_5	5	1.3779
1532	6_D6_APE2_5	APE2_5	5	1.3779
1533	ctrl_p06_c1	pooled	0	1
1534	ctrl_p06_c1	pooled	0	1
1535	6_H2_MVB12_5	MVB12_5	5	1.2758
1536	6_H2_MVB12_5	MVB12_5	5	1.2758
1537	6_H7_PSR1_5	PSR1_5	5	1.2643
1538	6_H7_PSR1_5	PSR1_5	5	1.2643
1539	6_H3_WT_5	WT_5	5	1.3978
1540	6_H3_WT_5	WT_5	5	1.3978
1541	6_E8_STM1_5	STM1_5	5	1.3414
1542	6_E8_STM1_5	STM1_5	5	1.3414
1543	6_H1_PBP1_5	PBP1_5	5	1.3483
1544	6_H1_PBP1_5	PBP1_5	5	1.3483
1545	6_F9_VAM6_5	VAM6_5	5	0.49881
1546	6_F9_VAM6_5	VAM6_5	5	0.49881
1547	6_A12_GLN3_5	GLN3_5	5	0.00425
1548	6_A12_GLN3_5	GLN3_5	5	0.00425
1549	6_H12_SIT4_5	SIT4_5	5	0.19615
1550	6_H12_SIT4_5	SIT4_5	5	0.19615
1551	6_B4_SLM1_5	SLM1_5	5	1.352
1552	6_B4_SLM1_5	SLM1_5	5	1.352
1553	6_A2_WHI2_5	WHI2_5	5	1.1184
1554	6_A2_WHI2_5	WHI2_5	5	1.1184
1555	6_A7_WT_5	WT_5	5	1.249
1556	6_A7_WT_5	WT_5	5	1.249
1557	6_C8_PKH2_5	PKH2_5	5	1.3431
1558	6_C8_PKH2_5	PKH2_5	5	1.3431
1559	6_G7_MDS3_5	MDS3_5	5	1.3088
1560	6_G7_MDS3_5	MDS3_5	5	1.3088
1561	6_G9_RTG2_5	RTG2_5	5	0.0085485
1562	6_G9_RTG2_5	RTG2_5	5	0.0085485
1563	6_C7_APL6_5	APL6_5	5	1.2114
1564	6_C7_APL6_5	APL6_5	5	1.2114
1565	6_H11_SLM4_5	SLM4_5	5	1.2019
1566	6_H11_SLM4_5	SLM4_5	5	1.2019
1567	6_E5_MEP3_5	MEP3_5	5	1.3243
1568	6_E5_MEP3_5	MEP3_5	5	1.3243
1569	6_B5_WT_5	WT_5	5	1.0819
1570	6_B5_WT_5	WT_5	5	1.0819
1571	6_G5_WT_5	WT_5	5	1.3246
1572	6_G5_WT_5	WT_5	5	1.3246
1573	6_A4_ATG40_5	ATG40_5	5	1.2649
1574	6_A4_ATG40_5	ATG40_5	5	1.2649
1575	ctrl_p06_c1	pooled	0	1
1576	ctrl_p06_c1	pooled	0	1
1577	ctrl_p07_c1	pooled	0	1
1578	ctrl_p07_c1	pooled	0	1
1579	7_B8_TPD3_5	TPD3_5	5	0.00425
1580	7_B8_TPD3_5	TPD3_5	5	0.00425
1581	7_D8_ALY1_5	ALY1_5	5	1.1169
1582	7_D8_ALY1_5	ALY1_5	5	1.1169
1583	7_B4_SLM1_5	SLM1_5	5	1.4057
1584	7_B4_SLM1_5	SLM1_5	5	1.4057
1585	7_A3_SKO1_5	SKO1_5	5	1.3308
1586	7_A3_SKO1_5	SKO1_5	5	1.3308
1587	7_E7_FPR1_5	FPR1_5	5	1.2934
1588	7_E7_FPR1_5	FPR1_5	5	1.2934
1589	7_G4_CNL1_5	CNL1_5	5	1.4166
1590	7_G4_CNL1_5	CNL1_5	5	1.4166
1591	7_D2_NNK1_5	NNK1_5	5	1.4162
1592	7_D2_NNK1_5	NNK1_5	5	1.4162
1593	7_A9_RTG1_5	RTG1_5	5	0.03736
1594	7_A9_RTG1_5	RTG1_5	5	0.03736
1595	7_F3_RTG3_5	RTG3_5	5	0.01275
1596	7_F3_RTG3_5	RTG3_5	5	0.01275
1597	7_E9_WT_5	WT_5	5	1.3479
1598	7_E9_WT_5	WT_5	5	1.3479
1599	7_D9_MEH1_5	MEH1_5	5	1.1852
1600	7_D9_MEH1_5	MEH1_5	5	1.1852
1601	7_F9_VAM6_5	VAM6_5	5	0.46599
1602	7_F9_VAM6_5	VAM6_5	5	0.46599
1603	7_E6_VPS24_5	VPS24_5	5	0.88131
1604	7_E6_VPS24_5	VPS24_5	5	0.88131
1605	7_G7_MDS3_5	MDS3_5	5	1.3952
1606	7_G7_MDS3_5	MDS3_5	5	1.3952
1607	7_C2_YPK2_5	YPK2_5	5	1.2967
1608	7_C2_YPK2_5	YPK2_5	5	1.2967
1609	7_H5_BIT61_5	BIT61_5	5	1.3808
1610	7_H5_BIT61_5	BIT61_5	5	1.3808
1611	7_D11_WT_5	WT_5	5	1.2672
1612	7_D11_WT_5	WT_5	5	1.2672
1613	7_C12_AGX1_5	AGX1_5	5	1.3759
1614	7_C12_AGX1_5	AGX1_5	5	1.3759
1615	7_C11_GTR1_5	GTR1_5	5	1.2052
1616	7_C11_GTR1_5	GTR1_5	5	1.2052
1617	7_C3_WT_5	WT_5	5	1.3522
1618	7_C3_WT_5	WT_5	5	1.3522
1619	7_B12_BIT2_5	BIT2_5	5	0.03736
1620	7_B12_BIT2_5	BIT2_5	5	0.03736
1621	7_C8_PKH2_5	PKH2_5	5	1.3956
1622	7_C8_PKH2_5	PKH2_5	5	1.3956
1623	7_G12_MEP1_5	MEP1_5	5	0.03736
1624	7_G12_MEP1_5	MEP1_5	5	0.03736
1625	7_H9_BUL1_5	BUL1_5	5	1.3929
1626	7_H9_BUL1_5	BUL1_5	5	1.3929
1627	7_F10_PPH21_5	PPH21_5	5	1.1159
1628	7_F10_PPH21_5	PPH21_5	5	1.1159
1629	ctrl_p07_c1	pooled	0	1
1630	ctrl_p07_c1	pooled	0	1
1631	7_B3_NPR3_5	NPR3_5	5	1.4444
1632	7_B3_NPR3_5	NPR3_5	5	1.4444
1633	7_D7_APL2_5	APL2_5	5	0.00425
1634	7_D7_APL2_5	APL2_5	5	0.00425
1635	7_G11_GTR2_5	GTR2_5	5	1.0952
1636	7_G11_GTR2_5	GTR2_5	5	1.0952
1637	7_C6_POR1_5	POR1_5	5	0.61941
1638	7_C6_POR1_5	POR1_5	5	0.61941
1639	7_G5_WT_5	WT_5	5	1.462
1640	7_G5_WT_5	WT_5	5	1.462
1641	7_A1_NPR1_5	NPR1_5	5	0.60649
1642	7_A1_NPR1_5	NPR1_5	5	0.60649
1643	7_B7_PTC6_5	PTC6_5	5	1.3168
1644	7_B7_PTC6_5	PTC6_5	5	1.3168
1645	7_A4_ATG40_5	ATG40_5	5	1.3167
1646	7_A4_ATG40_5	ATG40_5	5	1.3167
1647	7_D10_ATG39_5	ATG39_5	5	1.3369
1648	7_D10_ATG39_5	ATG39_5	5	1.3369
1649	7_B1_NPR2_5	NPR2_5	5	0.36426
1650	7_B1_NPR2_5	NPR2_5	5	0.36426
1651	7_H6_ALY2_5	ALY2_5	5	1.3105
1652	7_H6_ALY2_5	ALY2_5	5	1.3105
1653	7_B11_DBF2_5	DBF2_5	5	0.00425
1654	7_B11_DBF2_5	DBF2_5	5	0.00425
1655	7_C10_GAT1_5	GAT1_5	5	0.022313
1656	7_C10_GAT1_5	GAT1_5	5	0.022313
1657	7_F4_ATG14_5	ATG14_5	5	1.3808
1658	7_F4_ATG14_5	ATG14_5	5	1.3808
1659	7_F2_SEA4_5	SEA4_5	5	1.2587
1660	7_F2_SEA4_5	SEA4_5	5	1.2587
1661	7_G8_LST7_5	LST7_5	5	0.0085
1662	7_G8_LST7_5	LST7_5	5	0.0085
1663	7_B5_WT_5	WT_5	5	1.3053
1664	7_B5_WT_5	WT_5	5	1.3053
1665	7_G6_PPM1_5	PPM1_5	5	1.394
1666	7_G6_PPM1_5	PPM1_5	5	1.394
1667	7_D3_YPK1_5	YPK1_5	5	1.4261
1668	7_D3_YPK1_5	YPK1_5	5	1.4261
1669	7_A10_GCN4_5	GCN4_5	5	0.53972
1670	7_A10_GCN4_5	GCN4_5	5	0.53972
1671	7_C9_RTC1_5	RTC1_5	5	1.3475
1672	7_C9_RTC1_5	RTC1_5	5	1.3475
1673	7_D5_LTV1_5	LTV1_5	5	0.0085
1674	7_D5_LTV1_5	LTV1_5	5	0.0085
1675	7_E1_FAP1_5	FAP1_5	5	1.1358
1676	7_E1_FAP1_5	FAP1_5	5	1.1358
1677	7_C4_RIM15_5	RIM15_5	5	1.3004
1678	7_C4_RIM15_5	RIM15_5	5	1.3004
1679	7_F11_DOA4_5	DOA4_5	5	0.6758
1680	7_F11_DOA4_5	DOA4_5	5	0.6758
1681	ctrl_p07_c1	pooled	0	1
1682	ctrl_p07_c1	pooled	0	1
1683	7_E5_MEP3_5	MEP3_5	5	1.3458
1684	7_E5_MEP3_5	MEP3_5	5	1.3458
1685	7_C7_APL6_5	APL6_5	5	1.2996
1686	7_C7_APL6_5	APL6_5	5	1.2996
1687	7_H7_PSR1_5	PSR1_5	5	1.3154
1688	7_H7_PSR1_5	PSR1_5	5	1.3154
1689	7_F5_empty2_5	empty2_5	5	0.01501
1690	7_F5_empty2_5	empty2_5	5	0.01501
1691	7_C1_MSN2_5	MSN2_5	5	1.2163
1692	7_C1_MSN2_5	MSN2_5	5	1.2163
1693	7_A11_RRD2_5	RRD2_5	5	0.19615
1694	7_A11_RRD2_5	RRD2_5	5	0.19615
1695	7_H10_KSP1_5	KSP1_5	5	1.1469
1696	7_H10_KSP1_5	KSP1_5	5	1.1469
1697	7_H2_MVB12_5	MVB12_5	5	1.2518
1698	7_H2_MVB12_5	MVB12_5	5	1.2518
1699	7_D4_LST4_5	LST4_5	5	1.209
1700	7_D4_LST4_5	LST4_5	5	1.209
1701	7_A6_VAM3_5	VAM3_5	5	0.82603
1702	7_A6_VAM3_5	VAM3_5	5	0.82603
1703	7_B6_RRD1_5	RRD1_5	5	1.5357
1704	7_B6_RRD1_5	RRD1_5	5	1.5357
1705	7_G9_RTG2_5	RTG2_5	5	0.0057366
1706	7_G9_RTG2_5	RTG2_5	5	0.0057366
1707	7_A8_CPA1_5	CPA1_5	5	0.03736
1708	7_A8_CPA1_5	CPA1_5	5	0.03736
1709	7_D1_WT_5	WT_5	5	1.2142
1710	7_D1_WT_5	WT_5	5	1.2142
1711	7_F12_BMH2_5	BMH2_5	5	1.3207
1712	7_F12_BMH2_5	BMH2_5	5	1.3207
1713	7_G10_PDE1_5	PDE1_5	5	0.00425
1714	7_G10_PDE1_5	PDE1_5	5	0.00425
1715	7_E12_PUT1_5	PUT1_5	5	1.2875
1716	7_E12_PUT1_5	PUT1_5	5	1.2875
1717	7_D12_CSR1_5	CSR1_5	5	0.19615
1718	7_D12_CSR1_5	CSR1_5	5	0.19615
1719	7_H8_PSR2_5	PSR2_5	5	1.234
1720	7_H8_PSR2_5	PSR2_5	5	1.234
1721	7_A12_GLN3_5	GLN3_5	5	0.00425
1722	7_A12_GLN3_5	GLN3_5	5	0.00425
1723	7_F8_PAR32_5	PAR32_5	5	1.2457
1724	7_F8_PAR32_5	PAR32_5	5	1.2457
1725	7_A2_WHI2_5	WHI2_5	5	1.2113
1726	7_A2_WHI2_5	WHI2_5	5	1.2113
1727	7_E4_MSN4_5	MSN4_5	5	1.3769
1728	7_E4_MSN4_5	MSN4_5	5	1.3769
1729	7_A7_WT_5	WT_5	5	1.3426
1730	7_A7_WT_5	WT_5	5	1.3426
1731	7_E8_STM1_5	STM1_5	5	1.3253
1732	7_E8_STM1_5	STM1_5	5	1.3253
1733	ctrl_p07_c1	pooled	0	1
1734	ctrl_p07_c1	pooled	0	1
1735	7_C5_SLM2_5	SLM2_5	5	1.389
1736	7_C5_SLM2_5	SLM2_5	5	1.389
1737	7_H11_SLM4_5	SLM4_5	5	1.2484
1738	7_H11_SLM4_5	SLM4_5	5	1.2484
1739	7_B10_ORM1_5	ORM1_5	5	0.00425
1740	7_B10_ORM1_5	ORM1_5	5	0.00425
1741	7_H1_PBP1_5	PBP1_5	5	1.2532
1742	7_H1_PBP1_5	PBP1_5	5	1.2532
1743	7_E10_AVT4_5	AVT4_5	5	1.2708
1744	7_E10_AVT4_5	AVT4_5	5	1.2708
1745	7_H12_SIT4_5	SIT4_5	5	0.19615
1746	7_H12_SIT4_5	SIT4_5	5	0.19615
1747	7_B9_GAP1_5	GAP1_5	5	1.5287
1748	7_B9_GAP1_5	GAP1_5	5	1.5287
1749	7_F7_WT_5	WT_5	5	1.38
1750	7_F7_WT_5	WT_5	5	1.38
1751	7_A5_DDP1_5	DDP1_5	5	1.4194
1752	7_A5_DDP1_5	DDP1_5	5	1.4194
1753	7_E2_TIP41_5	TIP41_5	5	1.394
1754	7_E2_TIP41_5	TIP41_5	5	1.394
1755	7_E11_RAS2_5	RAS2_5	5	0.03736
1756	7_E11_RAS2_5	RAS2_5	5	0.03736
1757	7_D6_APE2_5	APE2_5	5	1.4374
1758	7_D6_APE2_5	APE2_5	5	1.4374
1759	7_F1_PHO85_5	PHO85_5	5	0.0173
1760	7_F1_PHO85_5	PHO85_5	5	0.0173
1761	7_E3_ATG13_5	ATG13_5	5	1.2257
1762	7_E3_ATG13_5	ATG13_5	5	1.2257
1763	7_F6_empty3_5	empty3_5	5	0.0085
1764	7_F6_empty3_5	empty3_5	5	0.0085
1765	7_H4_CCR4_5	CCR4_5	5	0.00425
1766	7_H4_CCR4_5	CCR4_5	5	0.00425
1767	7_G2_MTC5_5	MTC5_5	5	1.3648
1768	7_G2_MTC5_5	MTC5_5	5	1.3648
1769	7_G3_ARO1_5	ARO1_5	5	1.3944
1770	7_G3_ARO1_5	ARO1_5	5	1.3944
1771	7_H3_WT_5	WT_5	5	1.4421
1772	7_H3_WT_5	WT_5	5	1.4421
1773	7_G1_GIS1_5	GIS1_5	5	1.2282
1774	7_G1_GIS1_5	GIS1_5	5	1.2282
1775	ctrl_p07_c1	pooled	0	1
1776	ctrl_p07_c1	pooled	0	1
1777	ctrl_p08_c1	pooled	0	1
1778	ctrl_p08_c1	pooled	0	1
1779	8_F11_DOA4_5	DOA4_5	5	0.70984
1780	8_F11_DOA4_5	DOA4_5	5	0.70984
1781	8_E9_WT_5	WT_5	5	1.4615
1782	8_E9_WT_5	WT_5	5	1.4615
1783	8_F1_PHO85_5	PHO85_5	5	0.012683
1784	8_F1_PHO85_5	PHO85_5	5	0.012683
1785	8_C2_YPK2_5	YPK2_5	5	1.323
1786	8_C2_YPK2_5	YPK2_5	5	1.323
1787	8_E1_FAP1_5	FAP1_5	5	1.1314
1788	8_E1_FAP1_5	FAP1_5	5	1.1314
1789	8_C3_WT_5	WT_5	5	0.96518
1790	8_C3_WT_5	WT_5	5	0.96518
1791	8_D3_YPK1_5	YPK1_5	5	1.1329
1792	8_D3_YPK1_5	YPK1_5	5	1.1329
1793	8_G7_MDS3_5	MDS3_5	5	1.3352
1794	8_G7_MDS3_5	MDS3_5	5	1.3352
1795	8_A9_RTG1_5	RTG1_5	5	0.021461
1796	8_A9_RTG1_5	RTG1_5	5	0.021461
1797	8_A10_GCN4_5	GCN4_5	5	0.59498
1798	8_A10_GCN4_5	GCN4_5	5	0.59498
1799	8_A2_WHI2_5	WHI2_5	5	1.2819
1800	8_A2_WHI2_5	WHI2_5	5	1.2819
1801	8_E6_VPS24_5	VPS24_5	5	0.96993
1802	8_E6_VPS24_5	VPS24_5	5	0.96993
1803	8_E11_RAS2_5	RAS2_5	5	0.0085
1804	8_E11_RAS2_5	RAS2_5	5	0.0085
1805	8_A12_GLN3_5	GLN3_5	5	0.0067611
1806	8_A12_GLN3_5	GLN3_5	5	0.0067611
1807	8_G10_PDE1_5	PDE1_5	5	0.00425
1808	8_G10_PDE1_5	PDE1_5	5	0.00425
1809	8_C6_POR1_5	POR1_5	5	0.58304
1810	8_C6_POR1_5	POR1_5	5	0.58304
1811	8_F2_SEA4_5	SEA4_5	5	1.4046
1812	8_F2_SEA4_5	SEA4_5	5	1.4046
1813	8_C11_GTR1_5	GTR1_5	5	1.1968
1814	8_C11_GTR1_5	GTR1_5	5	1.1968
1815	8_H1_PBP1_5	PBP1_5	5	1.4199
1816	8_H1_PBP1_5	PBP1_5	5	1.4199
1817	8_D1_WT_5	WT_5	5	1.3672
1818	8_D1_WT_5	WT_5	5	1.3672
1819	8_F6_empty3_5	empty3_5	5	0.0085
1820	8_F6_empty3_5	empty3_5	5	0.0085
1821	8_D9_MEH1_5	MEH1_5	5	1.2634
1822	8_D9_MEH1_5	MEH1_5	5	1.2634
1823	8_H8_PSR2_5	PSR2_5	5	1.2716
1824	8_H8_PSR2_5	PSR2_5	5	1.2716
1825	8_B10_ORM1_5	ORM1_5	5	0.038843
1826	8_B10_ORM1_5	ORM1_5	5	0.038843
1827	8_B9_GAP1_5	GAP1_5	5	1.481
1828	8_B9_GAP1_5	GAP1_5	5	1.481
1829	ctrl_p08_c1	pooled	0	1
1830	ctrl_p08_c1	pooled	0	1
1831	8_C8_PKH2_5	PKH2_5	5	1.4037
1832	8_C8_PKH2_5	PKH2_5	5	1.4037
1833	8_H5_BIT61_5	BIT61_5	5	1.376
1834	8_H5_BIT61_5	BIT61_5	5	1.376
1835	8_H11_SLM4_5	SLM4_5	5	1.2324
1836	8_H11_SLM4_5	SLM4_5	5	1.2324
1837	8_A11_RRD2_5	RRD2_5	5	0.00425
1838	8_A11_RRD2_5	RRD2_5	5	0.00425
1839	8_H2_MVB12_5	MVB12_5	5	1.3872
1840	8_H2_MVB12_5	MVB12_5	5	1.3872
1841	8_B8_TPD3_5	TPD3_5	5	0.038843
1842	8_B8_TPD3_5	TPD3_5	5	0.038843
1843	8_H12_SIT4_5	SIT4_5	5	0.19615
1844	8_H12_SIT4_5	SIT4_5	5	0.19615
1845	8_B5_WT_5	WT_5	5	1.2669
1846	8_B5_WT_5	WT_5	5	1.2669
1847	8_F12_BMH2_5	BMH2_5	5	1.3608
1848	8_F12_BMH2_5	BMH2_5	5	1.3608
1849	8_B3_NPR3_5	NPR3_5	5	1.0679
1850	8_B3_NPR3_5	NPR3_5	5	1.0679
1851	8_A3_SKO1_5	SKO1_5	5	1.143
1852	8_A3_SKO1_5	SKO1_5	5	1.143
1853	8_H6_ALY2_5	ALY2_5	5	1.4201
1854	8_H6_ALY2_5	ALY2_5	5	1.4201
1855	8_C4_RIM15_5	RIM15_5	5	1.3044
1856	8_C4_RIM15_5	RIM15_5	5	1.3044
1857	8_C9_RTC1_5	RTC1_5	5	1.3837
1858	8_C9_RTC1_5	RTC1_5	5	1.3837
1859	8_D11_WT_5	WT_5	5	1.304
1860	8_D11_WT_5	WT_5	5	1.304
1861	8_E8_STM1_5	STM1_5	5	1.4882
1862	8_E8_STM1_5	STM1_5	5	1.4882
1863	8_F3_RTG3_5	RTG3_5	5	0.015054
1864	8_F3_RTG3_5	RTG3_5	5	0.015054
1865	8_G6_PPM1_5	PPM1_5	5	1.3792
1866	8_G6_PPM1_5	PPM1_5	5	1.3792
1867	8_G11_GTR2_5	GTR2_5	5	1.1566
1868	8_G11_GTR2_5	GTR2_5	5	1.1566
1869	8_B11_DBF2_5	DBF2_5	5	0.00425
1870	8_B11_DBF2_5	DBF2_5	5	0.00425
1871	8_D6_APE2_5	APE2_5	5	1.4362
1872	8_D6_APE2_5	APE2_5	5	1.4362
1873	8_G3_ARO1_5	ARO1_5	5	1.1012
1874	8_G3_ARO1_5	ARO1_5	5	1.1012
1875	8_G8_LST7_5	LST7_5	5	0.0085
1876	8_G8_LST7_5	LST7_5	5	0.0085
1877	8_F9_VAM6_5	VAM6_5	5	0.51101
1878	8_F9_VAM6_5	VAM6_5	5	0.51101
1879	8_B7_PTC6_5	PTC6_5	5	1.3142
1880	8_B7_PTC6_5	PTC6_5	5	1.3142
1881	ctrl_p08_c1	pooled	0	1
1882	ctrl_p08_c1	pooled	0	1
1883	8_G12_MEP1_5	MEP1_5	5	0.00425
1884	8_G12_MEP1_5	MEP1_5	5	0.00425
1885	8_D8_ALY1_5	ALY1_5	5	1.2337
1886	8_D8_ALY1_5	ALY1_5	5	1.2337
1887	8_F8_PAR32_5	PAR32_5	5	1.4095
1888	8_F8_PAR32_5	PAR32_5	5	1.4095
1889	8_E3_ATG13_5	ATG13_5	5	1.0172
1890	8_E3_ATG13_5	ATG13_5	5	1.0172
1891	8_G5_WT_5	WT_5	5	1.4657
1892	8_G5_WT_5	WT_5	5	1.4657
1893	8_D7_APL2_5	APL2_5	5	0.0063417
1894	8_D7_APL2_5	APL2_5	5	0.0063417
1895	8_E12_PUT1_5	PUT1_5	5	1.3427
1896	8_E12_PUT1_5	PUT1_5	5	1.3427
1897	8_C7_APL6_5	APL6_5	5	1.2574
1898	8_C7_APL6_5	APL6_5	5	1.2574
1899	8_H10_KSP1_5	KSP1_5	5	1.2273
1900	8_H10_KSP1_5	KSP1_5	5	1.2273
1901	8_B12_BIT2_5	BIT2_5	5	0.00425
1902	8_B12_BIT2_5	BIT2_5	5	0.00425
1903	8_F4_ATG14_5	ATG14_5	5	1.4231
1904	8_F4_ATG14_5	ATG14_5	5	1.4231
1905	8_A1_NPR1_5	NPR1_5	5	0.65191
1906	8_A1_NPR1_5	NPR1_5	5	0.65191
1907	8_H7_PSR1_5	PSR1_5	5	1.2986
1908	8_H7_PSR1_5	PSR1_5	5	1.2986
1909	8_H3_WT_5	WT_5	5	1.1298
1910	8_H3_WT_5	WT_5	5	1.1298
1911	8_B4_SLM1_5	SLM1_5	5	1.4236
1912	8_B4_SLM1_5	SLM1_5	5	1.4236
1913	8_H9_BUL1_5	BUL1_5	5	1.4267
1914	8_H9_BUL1_5	BUL1_5	5	1.4267
1915	8_C1_MSN2_5	MSN2_5	5	1.2922
1916	8_C1_MSN2_5	MSN2_5	5	1.2922
1917	8_A4_ATG40_5	ATG40_5	5	1.3831
1918	8_A4_ATG40_5	ATG40_5	5	1.3831
1919	8_C5_SLM2_5	SLM2_5	5	1.3859
1920	8_C5_SLM2_5	SLM2_5	5	1.3859
1921	8_E5_MEP3_5	MEP3_5	5	1.4307
1922	8_E5_MEP3_5	MEP3_5	5	1.4307
1923	8_A6_VAM3_5	VAM3_5	5	0.81143
1924	8_A6_VAM3_5	VAM3_5	5	0.81143
1925	8_E4_MSN4_5	MSN4_5	5	1.502
1926	8_E4_MSN4_5	MSN4_5	5	1.502
1927	8_G1_GIS1_5	GIS1_5	5	1.3801
1928	8_G1_GIS1_5	GIS1_5	5	1.3801
1929	8_D12_CSR1_5	CSR1_5	5	0.19615
1930	8_D12_CSR1_5	CSR1_5	5	0.19615
1931	8_C12_AGX1_5	AGX1_5	5	1.2928
1932	8_C12_AGX1_5	AGX1_5	5	1.2928
1933	ctrl_p08_c1	pooled	0	1
1934	ctrl_p08_c1	pooled	0	1
1935	8_D10_ATG39_5	ATG39_5	5	1.3761
1936	8_D10_ATG39_5	ATG39_5	5	1.3761
1937	8_D4_LST4_5	LST4_5	5	1.2256
1938	8_D4_LST4_5	LST4_5	5	1.2256
1939	8_G2_MTC5_5	MTC5_5	5	1.4506
1940	8_G2_MTC5_5	MTC5_5	5	1.4506
1941	8_A8_CPA1_5	CPA1_5	5	0.00425
1942	8_A8_CPA1_5	CPA1_5	5	0.00425
1943	8_C10_GAT1_5	GAT1_5	5	0.19615
1944	8_C10_GAT1_5	GAT1_5	5	0.19615
1945	8_F7_WT_5	WT_5	5	1.4355
1946	8_F7_WT_5	WT_5	5	1.4355
1947	8_D2_NNK1_5	NNK1_5	5	1.4784
1948	8_D2_NNK1_5	NNK1_5	5	1.4784
1949	8_E7_FPR1_5	FPR1_5	5	1.3457
1950	8_E7_FPR1_5	FPR1_5	5	1.3457
1951	8_E10_AVT4_5	AVT4_5	5	1.3749
1952	8_E10_AVT4_5	AVT4_5	5	1.3749
1953	8_E2_TIP41_5	TIP41_5	5	1.5282
1954	8_E2_TIP41_5	TIP41_5	5	1.5282
1955	8_A5_DDP1_5	DDP1_5	5	1.4018
1956	8_A5_DDP1_5	DDP1_5	5	1.4018
1957	8_G4_CNL1_5	CNL1_5	5	1.4557
1958	8_G4_CNL1_5	CNL1_5	5	1.4557
1959	8_G9_RTG2_5	RTG2_5	5	0.0056964
1960	8_G9_RTG2_5	RTG2_5	5	0.0056964
1961	8_D5_LTV1_5	LTV1_5	5	0.0085
1962	8_D5_LTV1_5	LTV1_5	5	0.0085
1963	8_A7_WT_5	WT_5	5	1.2266
1964	8_A7_WT_5	WT_5	5	1.2266
1965	8_B1_NPR2_5	NPR2_5	5	0.24779
1966	8_B1_NPR2_5	NPR2_5	5	0.24779
1967	8_F10_PPH21_5	PPH21_5	5	1.161
1968	8_F10_PPH21_5	PPH21_5	5	1.161
1969	8_H4_CCR4_5	CCR4_5	5	0.0063417
1970	8_H4_CCR4_5	CCR4_5	5	0.0063417
1971	8_B6_RRD1_5	RRD1_5	5	1.4989
1972	8_B6_RRD1_5	RRD1_5	5	1.4989
1973	8_F5_empty2_5	empty2_5	5	0.01275
1974	8_F5_empty2_5	empty2_5	5	0.01275
1975	ctrl_p08_c1	pooled	0	1
1976	ctrl_p08_c1	pooled	0	1
1977	ctrl_p09_c1	pooled	0	1
1978	ctrl_p09_c1	pooled	0	1
1979	9_C2_YPK2_30	YPK2_30	30	1.157
1980	9_C2_YPK2_30	YPK2_30	30	1.157
1981	9_E6_VPS24_30	VPS24_30	30	0.92366
1982	9_E6_VPS24_30	VPS24_30	30	0.92366
1983	9_H3_WT_30	WT_30	30	1.5111
1984	9_H3_WT_30	WT_30	30	1.5111
1985	9_F3_RTG3_30	RTG3_30	30	0.01275
1986	9_F3_RTG3_30	RTG3_30	30	0.01275
1987	9_F9_VAM6_30	VAM6_30	30	0.50536
1988	9_F9_VAM6_30	VAM6_30	30	0.50536
1989	9_G5_WT_30	WT_30	30	1.464
1990	9_G5_WT_30	WT_30	30	1.464
1991	9_G12_MEP1_30	MEP1_30	30	0.058921
1992	9_G12_MEP1_30	MEP1_30	30	0.058921
1993	9_A3_SKO1_30	SKO1_30	30	1.342
1994	9_A3_SKO1_30	SKO1_30	30	1.342
1995	9_G2_MTC5_30	MTC5_30	30	1.3758
1996	9_G2_MTC5_30	MTC5_30	30	1.3758
1997	9_E8_STM1_30	STM1_30	30	1.4426
1998	9_E8_STM1_30	STM1_30	30	1.4426
1999	9_B11_DBF2_30	DBF2_30	30	0.0062656
[truncated: 6,877 more rows]

## Sheet: ions
Index	ionMz	ionAverageInt	ionQualTIC	Top annotation name	Top annotation ids	Top annotation formula	Top annotation ion
1	59.0138	68292.6	0.958558	Acetatic acid	C00033; C00266	C2H4O2	-H(-)
2	70.0296	2673.47	0.744156	Acrylamide	C01659	C3H5NO	-H(-)
3	71.014	64630.8	0.820907	Propenoic acid C3:1	C00511; C00546	C3H4O2	-H(-)
4	74.0248	7229.16	0.829473	Glycine	C00037	C2H5NO2	-H(-)
5	75.0087	3424.98	0.0612449	Glycolate	C00160	C2H4O3	-H(-)
6	85.0295	81100.9	0.841843	Succinic aldehyde	C00741	C4H6O2	-H(-)
7	87.0087	53040.6	0.497462	Pyruvate	C00022; C00222	C3H4O3	-H(-)
8	88.0404	18555.9	0.942532	Alanine	C00041; C00099; C01401	C3H7NO2	-H(-)
9	89.0245	99139.7	0.969747	Lactate	C00184; C00186; C00256; C00577; C01013	C3H6O3	-H(-)
10	95.014	25624	0.356433	Furfural	C07090	C5H4O2	-H(-)
11	101.025	204409	-0.464077	Oxobutanoic acid	C00109; C00232; C06002	C4H6O3	-H(-)
12	102.056	270158	0.985686	Aminobutanoic acid (ABA)	C00334; C02356; C03284	C4H9NO2	-H(-)
13	103.04	10020.2	0.512959	Hydroxybutanoic acid	C06001	C4H8O3	-H(-)
14	104.035	6498.83	0.879802	Serine	C00065; C00740	C3H7NO3	-H(-)
15	105.019	4968.3	0.545819	D-Glyceric acid	C00258	C3H6O4	-H(-)
16	109.04	84352.1	0.938538	N-Acetylimidazole	C05130	C5H6N2O	-H(-)
17	111.02	272946	0.940997	Uracil	C00106	C4H4N2O2	-H(-)
18	112.04	6706.28	-0.0230691	Pyrroline carboxylic acid	C03912	C5H7NO2	-H(-)
19	113.025	475034	0.958268	2-Hydroxy-2,4-pentadienoic acid	C07091	C5H6O3	-H(-)
20	113.035	195517	0.983495	Dihydrouracil	C02512; C02565	C4H6N2O2	-H(-)
21	114.056	53853	0.929889	Proline	C00148; C18170	C5H9NO2	-H(-)
22	115.004	49029.6	0.879148	Fumarate	C00122	C4H4O4	-H(-)
23	115.04	103428	0.882987	Ketovaline	C00141; C03273	C5H8O3	-H(-)
24	116.036	7632.65	0.554046	Aspartate semialdehyde	C00441; C03508	C4H7NO3	-H(-)
25	116.072	608969	0.977758	Valine; Betaine	C00183	C5H11NO2	-H(-)
26	117.019	27900.7	0.810785	Succinate	C00042; C02170	C4H6O4	-H(-)
27	118.051	53982.9	0.972955	Threonine	C00188; C00263; C05519	C4H9NO3	-H(-)
28	118.98	15203.5	0.729562	Mercaptopyruvic acid	C00957	C3H4O3S	-H(-)
29	119.018	4209.21	0.808404	3-(Methylthio)propionic acid	C08276	C4H8O2S	-H(-)
30	119.05	30526.2	0.909076	Phenylacetaldehyde	C00601; C05627	C8H8O	-H(-)
31	121.03	27915.1	-0.0237216	Benzoate	C00180	C7H6O2	-H(-)
32	121.04	7690.66	-0.0154052	Nicotinamide	C00153	C6H6N2O	-H(-)
33	127.051	403390	0.983443	Dihydrothymine	C05715	C5H8N2O2	-H(-)
34	129.019	96707.2	0.42903	Itaconate	C00433	C5H6O4	-H(-)
35	130.051	16768.6	0.86738	5-Aminolevulinic acid	C00430; C01157; C01165	C5H9NO3	-H(-)
36	130.087	498700	0.98254	(Iso)Leucine	C00123; C00407	C6H13NO2	-H(-)
37	130.999	5014.96	-0.0460705	Oxaloacetic acid	C00036	C4H4O5	-H(-)
38	131.046	59296.2	0.967201	Asparagine	C00152	C4H8N2O3	-H(-)
39	131.082	1.26663e+06	-0.2103	Ornithine	C00077	C5H12N2O2	-H(-)
40	132.03	541895	0.98845	Aspartate	C00049	C4H7NO4	-H(-)
41	133.014	84124.2	0.278837	Malate	C00149	C4H6O5	-H(-)
42	133.051	201262	0.964329	Deoxyribose	C01801; C04039; C04272	C5H10O4	-H(-)
43	135.032	39273.1	0.922953	Hypoxanthine	C00262	C5H4N4O	-H(-)
44	135.045	49692.5	0.943942	Phenyl acetate	C06224; C07086	C8H8O2	-H(-)
45	144.066	8767.95	0.697866	4-Acetamidobutanoate	C02946; C04076	C6H11NO3	-H(-)
46	145.015	31248.3	0.773312	Oxoglutarate	C00026; C06316	C5H6O5	-H(-)
47	145.051	327800	0.515659	2-Dehydropantoate	C00966; C06006; C14463	C6H10O4	-H(-)
48	145.062	2.58637e+06	0.98534	Glutamine	C00064	C5H10N2O3	-H(-)
49	145.098	135609	0.713658	Lysine	C00047	C6H14N2O2	-H(-)
50	146.046	1.61477e+06	0.988566	Glutamate	C00025; C00302; C00979; C05938	C5H9NO4	-H(-)
51	147.03	235369	0.482605	Hydroxyglutarate	C00652; C01087; C06032	C5H8O5	-H(-)
52	147.067	98544.7	0.974057	Mevalonate	C00418; C00522; C06007	C6H12O4	-H(-)
53	148.044	15539.3	0.856467	Methionine	C00073	C5H11NO2S	-H(-)
54	149.045	11185.6	0.879203	Pentose	C00121; C00181; C00216; C00310	C5H10O5	-H(-)
55	149.097	2959.77	0.19125	Perillyl aldehyde	C02576	C10H14O	-H(-)
56	150.043	4720.78	0.678297	Guanine	C00242	C5H5N5O	-H(-)
57	151.026	17672.5	0.944854	Xanthine	C00385	C5H4N4O2	-H(-)
58	151.061	5743.39	0.736523	Xylitol	C00379	C5H12O5	-H(-)
59	152.035	61712.3	0.914648	3-Hydroxyanthranilate	C00632	C7H7NO3	-H(-)
60	154.062	477561	0.771371	Histidine	C00135	C6H9N3O2	-H(-)
61	155.01	46892.5	0.931338	Orotate	C00295	C5H4N2O4	-H(-)
62	157.015	19782.2	-0.00113511	2-Maleylacetate	C02222	C6H6O5	-H(-)
63	157.026	75661.6	0.962605	Dihydroorotate	C00337	C5H6N2O4	-H(-)
64	157.037	26965.8	0.938448	Allantoin	C02350	C4H6N4O3	-H(-)
65	157.05	156559	0.949392	Isopropylmaleate	C02631	C7H10O4	-H(-)
66	160.061	30910.5	0.951285	Aminoadipate	C00956; C01077	C6H11NO4	-H(-)
67	163.04	17512.3	0.781942	Coumarate	C00166; C00811	C9H8O3	-H(-)
68	164.071	220692	0.977569	Phenylalanine	C00079; C02265	C9H11NO2	-H(-)
69	166.975	4680.15	0.61658	Phosphoenolpyruvate	C00074	C3H5O6P	-H(-)
70	168.066	23579.4	0.808264	Pyridoxine	C00314	C8H11NO3	-H(-)
71	169.05	4311.66	0.343982	3,4-Dihydroxyphenylethyleneglycol	C05576	C8H10O4	-H(-)
72	171.007	15876.1	0.930168	sn-Glycerol 3-phosphate	C00093	C3H9O6P	-H(-)
73	171.029	7273.35	0.797116	3-Dehydroshikimate	C02637	C7H8O5	-H(-)
74	172.061	8158.57	0.81547	Acetyl-Glu-semialdehyde	C01250	C7H11NO4	-H(-)
75	173.009	45365.9	-0.184944	Aconitate	C00417	C6H6O6	-H(-)
76	173.047	19323.2	0.496533	Shikimate	C00493; C04236	C7H10O5	-H(-)
77	173.104	2.58579e+06	-0.322497	Arginine	C00062	C6H14N4O2	-H(-)
78	175.026	64483.2	-0.177238	Hexuronic acid; Ascorbate	C02670	C6H8O6	-H(-)
79	175.061	2.58492e+06	0.912866	3-Propylmalate	C02504; C04411	C7H12O5	-H(-)
80	179.035	43090.5	0.912894	3-(4-Hydroxyphenyl)pyruvate	C01179; C01197	C9H8O4	-H(-)
81	179.056	450949	0.977486	Hexose	C00031; C00095; C00124; C00137; C00159; C00221; C00267; C00984; C02336	C6H12O6	-H(-)
82	180.066	262730	0.939133	Tyrosine	C00082	C9H11NO3	-H(-)
83	182.97	6616.08	0.836881	3-Phosphonooxypyruvate	C03232	C3H5O7P	-H(-)
84	183.066	4691.36	0.111986	Choline-P	C00588	C5H15NO4P	-H(-)
85	184.002	155630	0.912164	Phosphoserine	C01005	C3H8NO6P	-H(-)
86	184.985	30951.8	0.687977	Phosphoglycerate	C00197; C00631	C3H7O7P	-H(-)
87	186.113	2547.38	0.532568	8-Amino-7-oxononanoate	C01092	C9H17NO3	-H(-)
88	187.025	138240	0.352321	(Z)-But-1-ene-1,2,4-tricarboxylate	C04002; C04225	C7H8O6	-H(-)
89	188.035	22006.6	0.924497	1-Nitronaphthalene-5,6-oxide	C14800; C14802	C10H7NO3	-H(-)
90	188.056	30987.1	0.863549	Acetyl-Glu	C00624	C7H11NO5	-H(-)
91	189.039	7266.23	0.500906	3-Dehydroquinate	C00944	C7H10O6	-H(-)
92	190.051	17528.4	0.891698	5-Hydroxyindoleacetate	C05635; C16596	C10H9NO3	-H(-)
93	190.974	19877.2	0.549826	2-Chloromaleylacetate	C06329	C6H5ClO5	-H(-)
94	191.02	2.36811e+06	-0.406916	(Iso)Citrate	C00158; C00311	C6H8O7	-H(-)
95	192.067	14841.6	0.375604	3-Carbamoyl-2-phenylpropionaldehyde	C16587; C16595	C10H11NO3	-H(-)
96	194.082	3667.37	-0.164731	Methyl-Tyr	C16586	C10H13NO3	-H(-)
97	195.051	17288.5	0.856177	Hexonic acid	C00257; C00800	C6H12O7	-H(-)
98	198.017	5280.19	0.810937	P-homoserine	C01102; C05702; C12215	C4H10NO6P	-H(-)
99	198.088	3377.15	0.741362	gamma-Glutamyl-beta-aminopropiononitrile	C06114	C8H13N3O3	-H(-)
100	203.022	7322.42	0.512654	Oxaloglutarate	C05533	C7H8O7	-H(-)
101	203.083	47114.3	0.932734	Tryptophan	C00078	C11H12N2O2	-H(-)
102	205.035	1.35908e+06	-0.0463337	(R)-2-Hydroxybutane-1,2,4-tricarboxylate	C01251; C02225; C05662	C7H10O7	-H(-)
103	206.082	7374.19	0.772123	Acetyl-Phe	C05620	C11H13NO3	-H(-)
104	207.078	9619.87	0.779566	Kynurenine	C00328; C05647	C10H12N2O3	-H(-)
105	213.017	48806.5	0.978794	2-Deoxy-D-ribose 1-phosphate	C00672; C00673	C5H11O7P	-H(-)
106	214.048	89735.1	0.921186	sn-Glycero-3-phosphoethanolamine	C01233	C5H14NO6P	-H(-)
107	218.033	16733	0.866471	4-Amino-2-methyl-5-phosphomethylpyrimidine	C04556	C6H10N3O4P	-H(-)
108	218.103	26041.1	0.952676	Pantothenate	C00864	C9H17NO5	-H(-)
109	219.016	7754.81	0.721987	3-(Imidazol-4-yl)-2-oxopropyl phosphate	C01267	C6H9N2O5P	-H(-)
110	221.06	34837.1	0.850444	Cystathionine	C00542; C02291	C7H14N2O4S	-H(-)
111	223.072	14954.4	0.799492	3-Hydroxy-L-kynurenine	C03227; C05651	C10H12N2O4	-H(-)
112	225.09	4270.52	0.461373	Porphobilinogen	C00931	C10H14N2O4	-H(-)
113	225.098	4207.22	0.474074	Carnosine	C00386	C9H14N4O3	-H(-)
114	226.013	4360.74	0.470565	L-Glutamyl 5-phosphate	C03287	C5H10NO7P	-H(-)
115	227.035	3629.14	0.6714	(R)-5-Phosphomevalonate	C01107	C6H13O7P	-H(-)
116	229.012	14979.2	0.925505	Pentose P	C00117; C00199; C00231; C00620	C5H11O8P	-H(-)
117	235.17	13896.7	0.862774	Farnesoic acid	C16502	C15H24O2	-H(-)
118	237.028	19135.7	0.861388	D-erythro-1-(Imidazol-4-yl)glycerol 3-phosphate	C04666	C6H11N2O6P	-H(-)
119	239.017	6252.82	0.216924	L-Cystine	C00491	C6H12N2O4S2	-H(-)
120	242.079	33380.5	0.8477	Cytidine	C00475; C05711	C9H13N3O5	-H(-)
121	243.062	89763	0.934773	Uridine	C00299; C02067	C9H12N2O6	-H(-)
122	246.016	11084.3	0.867395	Pyridoxal phosphate	C00018	C8H10NO6P	-H(-)
123	249.055	87468.9	0.944861	gamma-L-Glutamyl-L-cysteine	C00669	C8H14N2O5S	-H(-)
124	254.093	5856.24	0.863317	Nicotinamide-beta-riboside	C03150	C11H15N2O5	-H(-)
125	257.103	4695.17	0.818521	sn-Glycero-3-phosphocholine	C00670	C8H21NO6P	-H(-)
126	258.038	8182.24	0.890046	Hexosamine P	C00352; C12214	C6H14NO8P	-H(-)
127	259.023	152005	0.956014	Hexose P	C00085; C00092; C00103; C00275; C00446; C00636; C00668; C01094; C01097; C01172; C01177; C03546; C04006; C05345	C6H13O9P	-H(-)
128	264.952	5751.09	0.642002	3-Phospho-D-glyceroyl phosphate	C00236	C3H8O10P2	-H(-)
129	267.073	107336	0.976447	Inosine	C00294	C10H12N4O5	-H(-)
130	275.017	23658.8	0.655724	6-Phosphogluconate	C00345	C6H13O10P	-H(-)
131	275.125	15733.9	0.866872	N6-(L-1,3-Dicarboxypropyl)-L-lysine	C00449	C11H20N2O6	-H(-)
132	277.217	4423.62	0.663284	(6Z,9Z,12Z)-Octadecatrienoic acid	C06426; C06427	C18H30O2	-H(-)
133	279.233	15112.7	-0.236004	C18:2	C01595	C18H32O2	-H(-)
134	282.084	26235.7	0.937413	Guanosine	C00387	C10H13N5O5	-H(-)
135	289.033	18665.4	0.838957	Sedoheptulose P	C05382	C7H15O10P	-H(-)
136	289.115	6631.84	0.795621	N-(L-Arginino)succinate	C03406	C10H18N4O6	-H(-)
137	296.084	6373.84	0.599237	5'-Methylthioadenosine	C00170	C11H15N5O3S	-H(-)
138	298.07	8725	0.846522	D-4'-Phosphopantothenate	C03492	C9H18NO8P	-H(-)
139	300.289	2381.31	0.616653	Sphinganine	C00836	C18H39NO2	-H(-)
140	301.216	5220.71	0.88639	(5Z,8Z,11Z,14Z,17Z)-Icosapentaenoic acid	C06428	C20H30O2	-H(-)
141	306.077	2.26076e+06	0.928276	Glutathione	C00051	C10H17N3O6S	-H(-)
142	306.999	4805.22	0.854434	(R)-5-Diphosphomevalonate	C01143	C6H14O10P2	-H(-)
143	312.063	4642.4	0.79493	FGAM	C04640	C8H16N3O8P	-H(-)
144	313.217	6829.46	0.748204	Progesterone	C00410	C21H30O2	-H(-)
145	316.285	2790.38	0.580426	Phytosphingosine	C12144	C18H39NO3	-H(-)
146	317.214	2752.31	0.730175	Leukotriene A4	C00909	C20H30O3	-H(-)
147	321.112	3322.62	0.859897	N-((R)-Pantothenoyl)-L-cysteine	C04079	C12H22N2O6S	-H(-)
148	322.045	21404	0.7961	CMP	C00055	C9H14N3O8P	-H(-)
149	323.028	52513.5	0.928494	UMP	C00105; C01168	C9H13N2O9P	-H(-)
150	338.989	254888	0.6149	Hexose bisP	C00354; C00665; C01220; C03785; C05378	C6H14O12P2	-H(-)
151	341.109	1.87338e+06	0.830903	Disaccharide	C00089; C00252; C01083; C05402	C12H22O11	-H(-)
152	346.055	225364	0.90862	AMP	C00020; C00362	C10H14N5O7P	-H(-)
153	347.041	12731.2	0.891186	IMP	C00130	C10H13N4O8P	-H(-)
154	348.088	5354.88	0.841626	S-(Formylmethyl)glutathione	C14871	C12H19N3O7S	-H(-)
155	355.067	4107.68	0.886253	5-Amino-6-(5'-phospho-D-ribitylamino)uracil	C04454	C9H17N4O9P	-H(-)
156	362.05	18317.9	0.802084	GMP	C00144	C10H14N5O8P	-H(-)
157	363.034	3166.85	0.866195	Xanthosine 5'-phosphate	C00655	C10H13N4O9P	-H(-)
158	367.018	4491.4	0.839136	Orotidine 5'-phosphate	C01103	C10H13N2O11P	-H(-)
159	369.001	53434	0.880925	Sedoheptulose bisP	C00447	C7H16O13P2	-H(-)
160	381.123	47336.4	0.879762	trans,trans-Farnesyl diphosphate	C00448	C15H28O7P2	-H(-)
161	383.114	14798	0.803316	S-Adenosyl-L-homocysteine	C00021	C14H20N6O5S	-H(-)
162	387	7109.38	0.888156	dUDP	C01346	C9H14N2O11P2	-H(-)
163	401.015	6563.36	0.786321	dTDP	C00363	C10H16N2O11P2	-H(-)
164	402.011	18145.9	0.519495	CDP	C00112	C9H15N3O11P2	-H(-)
165	402.995	77569.4	0.792133	UDP	C00015	C9H14N2O12P2	-H(-)
166	418.956	15574.3	0.866901	D-myo-Inositol 1,4,5-trisphosphate	C01245	C6H15O15P3	-H(-)
167	421.075	16995.2	0.857658	alpha,alpha'-Trehalose 6-phosphate	C00689; C16688	C12H23O14P	-H(-)
168	423.164	4914.08	0.904478	Chitobiose	C01674	C16H28N2O11	-H(-)
169	426.022	177836	0.725961	ADP	C00008; C00054; C00361	C10H15N5O10P2	-H(-)
170	441.337	5467.92	0.897633	4alpha-Methylzymosterol-4-carboxylate	C15808	C29H46O3	-H(-)
171	442.017	38858.6	0.587583	GDP	C00035	C10H15N5O11P2	-H(-)
172	449.186	5867.38	0.787017	Geranylgeranyl diphosphate	C00353	C20H36O7P2	-H(-)
173	453.067	3340.35	0.567118	1-(5'-Phosphoribosyl)-5-amino-4-(N-succinocarboxamide)-imidazole	C04823	C13H19N4O12P	-H(-)
174	455.098	7219.33	0.799586	FMN (ox)	C00061	C17H21N4O9P	-H(-)
175	480.981	6334.61	0.586615	dTTP	C00459	C10H17N2O14P3	-H(-)
176	481.978	27148.9	0.817618	CTP	C00063	C9H16N3O14P3	-H(-)
177	482.962	60451.5	0.442681	UTP	C00075	C9H15N2O15P3	-H(-)
178	503.162	30473.5	0.812741	Trisaccharide	C00492; C05404	C18H32O16	-H(-)
179	505.988	139157	0.30378	ATP	C00002; C00286	C10H16N5O13P3	-H(-)
180	521.983	15648.5	0.0987895	GTP	C00044	C10H16N5O14P3	-H(-)
181	539.996	12890.4	0.884891	Formamidopyrimidine nucleoside triphosphate	C05922	C10H18N5O15P3	-H(-)
182	558.064	10534.1	0.77868	ADP-ribose	C00301; C02741	C15H23N5O14P2	-H(-)
183	563.069	16006.3	0.789176	dTDP-hexose	C00842; C02097	C16H26N2O16P2	-H(-)
184	565.048	150454	0.845627	UDP-hexose	C00029; C00052	C15H24N2O17P2	-H(-)
185	604.07	27740.6	0.655818	GDP-hexose	C00096	C16H25N5O16P2	-H(-)
186	606.075	703723	0.838873	UDP-acetyl-hexosamine	C00043	C17H27N3O17P2	-H(-)
187	611.144	17578.9	0.682158	Glutathione disulfide	C00127	C20H32N6O12S2	-H(-)
188	664.118	64359.6	0.78941	NADH (red)	C00004	C21H29N7O14P2	-H(-)
189	665.213	7991.12	0.671654	Stachyose	C01613	C24H42O21	-H(-)
190	766.107	3474.78	0.767582	CoA	C00010	C21H36N7O16P3S	-H(-)
191	784.149	4139.05	0.766098	FAD (ox)	C00016	C27H33N9O15P2	-H(-)
192	808.118	20384.2	0.736813	Acetyl-CoA	C00024	C23H38N7O17P3S	-H(-)

## Sheet: intensities1
Index	ionMz		0001 / LST4_90	0002 / LST4_90	0003 / DDP1_90	0004 / DDP1_90	0005 / APL2_90	0006 / APL2_90	0007 / empty2_90	0008 / empty2_90	0009 / LST7_90	0010 / LST7_90	0011 / ATG14_90	0012 / ATG14_90	0013 / GAT1_90	0014 / GAT1_90	0015 / PSR2_90	0016 / PSR2_90	0017 / MEP1_90	0018 / MEP1_90	0019 / TIP41_90	0020 / TIP41_90	0021 / SLM1_90	0022 / SLM1_90	0023 / PSR1_90	0024 / PSR1_90	0025 / PPM1_90	0026 / PPM1_90	0027 / MSN2_90	0028 / MSN2_90	0029 / pooled	0030 / pooled	0031 / SKO1_90	0032 / SKO1_90	0033 / ORM1_90	0034 / ORM1_90	0035 / RAS2_90	0036 / RAS2_90	0037 / MSN4_90	0038 / MSN4_90	0039 / FAP1_90	0040 / FAP1_90	0041 / GCN4_90	0042 / GCN4_90	0043 / BIT61_90	0044 / BIT61_90	0045 / RTC1_90	0046 / RTC1_90	0047 / APL6_90
1	59.0138		39975	39416	30969	28599	37599	35605	52230	51274	36269	35377	39833	40187	38780	33346	31964	35278	36496	37412	33008	32038	32000	32456	33008	32565	37389	33204	31544	28575	42454	41120	33031	31487	36116	37304	34330	34555	31123	33747	41822	41861	47386	51749	29704	31873	45011	47088	36416
2	70.0296		2282	2252	3173	3704	918	236	287	249	399	173	2640	2575	377	315	3454	3344	142	164	1694	1583	3100	3415	3716	4675	2290	1857	2701	2985	1521	1490	2617	3667	233	231	247	133	2809	3457	2431	2518	1356	1200	3212	2914	4099	2195	2693
3	71.014		35643	35743	30804	30518	34237	36347	44536	42642	39182	38617	35162	33317	31325	28622	33590	31641	37881	36916	31410	30756	32484	29791	31733	33916	28024	30714	34526	32485	39051	38600	37138	35971	34201	35089	33582	31466	28528	31737	36225	36798	40721	45369	31943	29700	30474	31790	34066
4	74.0248		6580	7822	9529	8468	622	640	62	316	188	441	6284	6682	332	94	8073	8401	434	294	6650	7959	7881	8737	7972	8504	7917	7816	5780	5249	3594	4145	7256	7652	921	431	356	518	7438	8706	8548	7098	5385	5352	9029	8189	9723	9894	9010
5	75.0087		1889	1754	1709	1854	1906	1896	2930	2663	2385	2430	1950	2345	2295	2069	1877	1912	1370	2149	1325	2380	2129	1993	2047	1125	1953	1597	2016	1783	2366	1992	1403	1569	1727	1917	1468	2041	1855	1915	2159	1372	1729	1979	1740	2064	1877	1904	1920
6	85.0295		47053	42674	34939	33477	66115	63726	96137	96110	76479	73323	44518	39834	63946	62716	37268	39478	69012	65887	31320	32594	39375	33700	32973	35738	36164	38146	41257	37464	61479	65494	44245	35585	61371	61169	61870	65784	35556	33657	43370	40131	56861	60218	33453	30720	46924	42236	44762
7	87.0087		34335	28423	31298	27345	17505	17871	16509	18230	20624	19624	28614	31034	18019	17841	32686	28065	18798	18583	25749	21882	32014	26912	26944	26422	32590	27399	32342	31474	33517	31677	47011	38070	17728	18274	16614	15629	29632	28512	28902	30712	29713	27453	26795	25389	34687	33342	36327
8	88.0404		21812	18370	25227	24267	1408	1882	544	629	929	1123	33148	31987	2197	2799	26286	25829	1397	1079	14737	16365	21478	19907	29591	30134	15002	16985	15902	16536	7370	7088	25971	23844	1416	1150	1578	668	19155	18493	20142	19549	13049	13047	23096	22981	31922	30912	23111
9	89.0245		63467	65895	34635	36565	40289	44971	88702	91093	53302	49154	44952	44879	35151	33562	41425	44050	49031	49622	34101	38371	41710	43019	47376	51511	40070	40606	48477	52651	58223	61518	39613	42333	42078	42160	37825	45403	41545	37807	68697	70065	77031	76730	46351	43325	44667	43506	39845
10	95.014		24587	24765	18655	17384	35004	34075	49916	53679	41071	41443	20390	21127	32362	30613	19935	19754	38017	35760	20071	18324	18617	18635	19094	18052	19006	22271	19804	20444	33206	32333	19920	18639	35453	34401	32698	34335	20103	17569	23332	24799	33942	34448	19493	20737	20484	21610	20139
11	101.025		131687	127639	120359	118596	139239	143260	179561	197776	180161	176454	135461	132590	141158	141516	123989	119637	155691	157563	128531	120989	126703	126336	118130	123068	118674	122247	127323	128744	150328	154092	129905	128788	144463	143117	147245	150198	123816	117600	129981	134124	153890	158172	129668	122288	134148	127636	126402
12	102.056		585211	536737	492208	485854	22378	22424	7874	8096	10092	9574	504690	506165	22410	21463	437252	439310	17872	15945	598898	589533	413033	388880	533997	521863	666458	650202	340515	330930	235566	238637	396460	390378	18701	17170	13132	11336	415471	398960	364859	365338	360352	346730	543324	516839	581471	574486	510192
13	103.04		7971	7509	8774	9739	3153	2303	3266	4176	3142	3056	7614	8188	2150	1904	8623	6714	2709	2550	8153	7999	8565	7983	9296	8518	6957	6995	8213	8745	8123	7626	9335	8353	3428	3033	2261	2447	8270	7928	8466	5957	5881	4518	8329	6752	8866	7159	10057
14	104.035		4140	4588	5225	6029	1455	1713	1302	1722	1319	777	3038	3248	1151	942	5271	5634	1494	1083	6648	8920	5366	5654	5156	5303	8754	9607	3923	4027	11523	9496	5669	5790	1036	1048	1450	940	4512	5361	5009	5151	4010	5180	5181	5561	6188	6657	5361
15	105.019		3926	4668	4051	4220	2813	2886	2577	2758	3343	2626	3723	5158	2820	3222	4875	4786	3366	3074	5103	5235	4397	4803	5676	3825	2846	5069	4656	5132	4011	4546	4174	5337	3050	2580	2195	3011	5777	4006	4231	5150	4099	4820	4620	4725	4151	4501	5003
16	109.04		115747	108698	151651	153215	9158	8855	2926	3569	3869	3559	126397	126591	7171	6156	177939	170732	8742	7170	117650	109526	131948	123399	149874	149408	108988	108750	133049	122793	57163	58278	153131	149884	8775	7650	5540	4811	109390	110092	108953	101002	64488	60273	122721	117622	133101	130190	91186
17	111.02		170578	138629	415950	393122	31726	31849	21970	19199	21722	20683	311935	298582	33883	28779	457716	433383	30048	24928	289470	253843	394210	340983	514089	490927	263635	238034	497221	440880	215905	195231	407287	371237	33191	30153	26882	22093	394513	361923	304968	266392	53903	51676	314105	262305	242710	234834	325649
18	112.04		5501	5222	5469	6354	4552	4516	3590	4143	6136	4900	5575	4962	4693	5469	6522	6465	3672	3719	6762	6227	5527	5041	6323	6032	5793	5159	6086	5188	5685	4451	5993	6448	3836	4473	4596	3764	5281	5874	4868	5335	5458	4439	6173	5962	6757	4656	6040
19	113.025		272499	253399	181064	186676	474946	492759	751310	755063	593072	558601	225993	218999	426066	412065	207602	201107	531710	535429	192580	188487	214319	205033	212856	200419	206902	207366	240929	227945	433725	429962	206589	197122	455985	466875	450118	463414	204070	200126	278035	263886	455484	463318	207211	192896	193983	198820	227613
20	113.035		115831	115802	298946	300245	72604	73176	89296	91051	74414	72017	196272	190492	61080	58091	288250	278986	74240	73043	134848	126958	269838	259795	338371	310616	104466	104449	280536	270544	140182	137269	267528	251883	65509	68731	60983	63769	256290	245026	112626	110613	82038	81031	239161	221536	164911	160002	224305
21	114.056		84295	73220	90586	90065	8611	8036	5013	4394	5565	3763	60922	59382	7516	7128	80561	74750	7515	6982	89934	85328	72143	68453	85220	85480	106173	103608	62489	61498	42044	40770	82024	76764	8452	7665	6858	5556	69431	66526	53979	49774	46033	46323	85107	82896	101653	101047	78477
22	115.004		30573	29007	53281	50394	6532	6594	6541	9942	6968	5459	48194	50474	7352	5937	51396	45700	6911	5450	30064	28282	47435	41046	58401	53263	33796	33248	47894	45841	35946	31890	57721	52712	8188	7591	5861	4955	42149	40267	36728	33408	27879	26897	42717	38636	44308	43124	48564
23	115.04		68852	56946	115678	114151	22073	21506	16034	16695	17435	16981	87314	82718	26881	24557	105190	100864	17672	17010	47792	41864	121492	109593	89505	82973	90411	78552	101227	100716	75441	76584	112728	98233	23894	20811	19152	20056	101102	95485	60308	60795	24312	23753	71855	65943	94312	87952	84859
24	116.036		4663	5550	6086	5136	1814	1937	2017	1706	1676	2330	4782	4406	2146	1450	5088	4551	1839	1965	4459	3854	5041	5228	4699	4412	5470	4558	3509	4738	2426	3069	6409	5868	2233	2228	2087	1515	4036	4970	4598	3883	2799	2792	4938	5207	6168	5914	5224
25	116.072		783949	720673	1279357	1207552	151094	146176	96802	89254	100853	106259	1054519	1039533	130604	129306	1109317	1099518	116413	109712	841510	824566	1067357	1001674	1169539	1158770	982814	954776	954787	913138	314856	304117	1006223	965218	133296	130174	105811	103228	1092925	1042767	702566	689839	340504	327511	1273869	1229016	1115468	1105045	879723
26	117.019		16638	15262	19693	21073	7478	7458	5542	6267	5604	5044	16850	17443	7519	7255	21464	19990	7405	6614	36675	37818	16901	20070	18942	18088	17903	17791	19626	20495	28218	26985	21626	18957	6513	6591	6893	6056	19275	19027	17964	16818	18177	19336	18249	17463	18271	19716	23155
27	118.051		63652	61921	70052	71538	5343	5326	2266	2228	2145	2549	56811	54038	3928	3079	72532	74510	4084	4314	51384	51403	70149	64950	70386	69375	54169	52782	53635	53049	41118	42087	65869	64187	4082	3971	2657	2057	60191	59671	73087	71218	51732	49320	72777	76055	78248	82458	65892
28	118.98		3846	4017	2889	3365	12318	10978	9960	9548	10941	8214	3048	3941	9799	9143	2828	3010	10785	10837	3204	3722	2966	2810	3868	3587	3217	3329	3923	3251	6369	7459	2515	3870	11839	9956	11164	12116	2534	2728	4507	4719	6735	7516	3043	3527	2652	2619	3497
29	119.017		814	722	597	723	1193	1127	1242	1288	1166	1078	644	968	961	903	581	705	1337	1042	659	725	558	646	659	818	895	679	865	784	894	979	588	530	882	1257	854	951	567	692	1188	893	874	1086	593	941	893	639	987
30	119.05		26517	24300	27190	27128	36442	38288	14251	13693	26748	23957	39660	39513	80872	79984	35435	35140	17488	21355	33186	32104	24318	23713	26812	28290	30733	32200	21229	17117	18099	18814	25401	22110	50774	54036	41260	41453	28677	27452	20291	22986	17074	15821	27273	25869	85433	84069	41836
31	121.03		14296	13456	12784	14447	17470	17178	23306	24266	22272	18544	13699	13304	17681	17190	15443	14729	23807	20530	17982	14254	13450	13478	12487	12897	13933	15327	15013	14635	33653	34493	14412	14239	17397	17659	17784	15870	11265	14231	13050	12677	14761	14040	13767	13628	13477	15695	13755
32	121.04		3674	4170	4009	4322	4200	4646	5372	5639	5614	5081	4427	4484	3843	4685	4172	4386	4226	5161	4319	4298	3786	4065	3704	4061	3790	3648	4487	4453	6423	6153	3813	4199	4982	3869	4918	4355	3499	4356	4126	4350	4395	4501	3927	3850	3787	4132	4125
33	127.051		934081	873137	635990	618873	36927	40322	11051	9433	11007	10808	589794	599078	27853	24579	585926	585857	25277	20410	594099	573984	506092	484165	635422	618062	656661	650940	478659	480570	197166	191918	559656	533178	30633	25197	17163	13194	515272	496667	598573	594636	655236	634006	660214	638982	814493	793327	552917
34	129.019		71953	56341	79868	77339	18451	17356	15755	15965	15956	15111	63286	64264	16846	16470	71847	65972	15750	15691	65072	56516	79294	62912	61880	59135	78092	71600	74133	59607	60887	52320	105541	84381	17700	15857	16101	15851	75471	65044	49635	44482	41894	39150	67754	52783	96466	92629	100562
35	130.052		13583	12098	19658	20038	4513	3920	3801	2868	4240	2792	26437	25099	3974	3985	33407	30139	4449	3932	18747	16875	18126	15501	24001	22097	13838	14014	14392	15160	10317	11149	16875	17298	3361	3242	3199	3097	16755	18054	13484	13807	12410	12405	27222	25459	19671	17866	17215
36	130.087		929734	860415	1263751	1247295	110028	107209	64251	60180	73861	69982	641545	638850	84338	83001	1276132	1276024	88726	82602	856050	837300	1068547	1021164	1134718	1133262	900947	876306	888745	847738	223439	215511	1142166	1104708	94789	91414	83515	75704	1071302	1050572	621319	619079	346298	341698	1254567	1189194	1340669	1326598	906185
37	130.999		2037	1272	2058	1973	1756	1561	2670	3590	2473	2070	1678	1831	2474	1269	2123	1985	2149	2007	977	1329	2182	1832	1900	1968	2171	2124	1953	1724	2275	2869	3200	2344	1575	2194	1828	2119	2076	1400	1937	1338	1921	1906	1744	1435	2597	3122	2774
38	131.046		95721	90616	96970	88524	8155	8540	4488	3992	3600	3507	79306	80111	6427	5932	100594	93058	5927	5242	83927	84434	76993	81882	95029	96372	101275	101730	76579	73206	31073	32356	97671	93644	7599	6310	4423	4635	76162	77740	72806	72373	65837	66723	92886	89871	106708	106007	83275
39	131.083		816609	632148	922022	895843	186325	152553	56907	53049	47307	43519	878477	827655	140278	105062	1052698	1012110	141096	111703	867888	772541	1019239	830769	1142220	1055233	1274238	1152246	937634	793976	749338	707287	829330	714475	150805	128822	80003	65724	824028	743983	1464837	1278138	2844173	2736687	1159825	982013	1060545	999302	953479
40	132.03		433896	398892	813528	778541	22390	26348	3780	3226	3675	3837	895192	904547	23311	18966	722786	712443	17524	10920	358102	340817	719563	671899	830487	809427	433651	419541	556777	533482	275548	257092	829602	801748	22238	18718	8910	6339	608613	581068	373527	360798	362177	362720	694120	640200	655255	657495	668448
41	133.014		50783	43098	67823	61913	13221	12696	8056	10077	11675	12718	49679	43327	14124	11281	67007	58996	12733	9125	53411	41047	64149	51920	80510	71426	63888	51391	97258	94315	75875	68209	82968	73003	16276	11495	11315	12487	66491	57994	75599	60621	32545	27552	55997	41337	56784	49095	57595
42	133.051		114694	94663	240793	227701	13281	12104	4026	3357	4577	4607	187398	185436	13214	13316	288167	280967	9354	9239	180750	168278	249966	225971	185955	183882	180400	176021	192897	178154	165183	161541	208392	195939	13304	11106	6778	4996	244288	237378	100923	101009	84455	84176	207305	192617	169895	167083	177819
43	135.031		74994	71756	118457	113797	8257	8445	5694	3862	3794	3881	35516	32132	5510	6350	91989	84219	6418	5042	85802	83801	93157	86302	114178	113223	93714	86580	87034	82315	10707	10114	91964	84734	6243	7858	6879	4225	101618	100197	58105	57936	37033	33791	115780	117279	113615	114053	94324
44	135.045		40565	38579	43925	42515	46554	43170	20887	19611	34217	35190	46175	47013	70599	79834	51940	54793	29479	28786	49723	46742	39380	36574	48979	48532	54426	54746	38240	38089	28730	26672	43628	40917	51248	50035	48022	53749	46936	45137	38493	42775	29199	26910	43742	44246	75097	72346	58333
45	144.066		7463	7123	9377	7621	2549	3074	1665	1923	2485	2189	7144	6766	3125	2366	9655	9301	2277	2287	11250	12137	7442	6441	9014	7919	8371	7687	7144	5573	4802	5268	7537	6967	2913	2538	2605	2173	7251	7191	6878	5402	4998	4682	9568	8228	9133	8613	7477
46	145.015		23164	16683	26838	24808	3364	2472	1513	2079	2645	2285	21418	19167	3590	2629	20088	19485	1784	2304	18720	17300	23399	18444	19647	18518	27280	21858	24560	20148	20880	18173	25946	21368	2272	2288	2909	2306	25688	19534	15881	13602	13114	11534	22872	18314	30004	25643	23657
47	145.051		216072	205602	181074	190039	22105	21529	8039	7679	11763	11806	158782	170851	30257	28469	155195	160036	14326	12526	250419	248129	166103	162535	169623	172216	169899	170215	132492	130796	80624	81902	147885	147562	20910	23317	18465	16612	147662	156008	130680	135448	155321	151759	203658	196873	220642	224777	188123
48	145.062		7010288	6434147	4610461	4520108	176071	171653	19244	15573	20963	18458	4368388	4399970	139628	118423	4377689	4251525	114443	84589	4397428	4297414	3689178	3476671	4670331	4577260	4851617	4707833	3479926	3366346	1326285	1270974	4059125	3859630	117172	108969	53973	35022	3715749	3588858	4375223	4347056	4868882	4825055	4863819	4665145	5908849	5886924	4021230
49	145.098		246110	221913	184854	183179	20654	16276	6124	5875	4394	5450	92558	95662	8070	5165	179934	175096	14240	11586	184682	171292	151235	133317	182560	174278	207385	199538	149703	137894	75047	70240	144244	130531	19135	13522	9181	7666	143152	134679	163655	149901	127552	123290	188305	177234	236837	226288	153499
50	146.046		2924580	2716866	2392090	2303210	67124	68829	9609	10047	10414	9063	2476258	2534809	63846	55099	2210397	2158425	44620	34428	3075770	3010026	1915949	1833372	2507708	2478810	3445961	3315864	1640974	1621721	1118414	1095160	2009891	1944701	50281	47553	27527	16253	2065056	1983354	1780982	1744149	1714955	1733322	2716704	2626787	2961916	2939356	2455021
51	147.03		169542	137442	188214	172703	29173	24731	17102	18263	17280	16759	168213	157146	26203	20941	198260	179769	22252	20269	162306	136804	169521	145247	191300	173146	150341	135589	186841	169388	157940	144152	188339	149752	26402	21937	21032	18570	188085	165348	173354	152026	91790	87969	175182	139701	193687	173890	177346
52	147.067		114479	102882	118024	122909	7399	6247	2203	2107	2818	2898	109506	110689	6603	6416	116014	114041	4666	4592	158925	152496	102047	94393	110695	101559	116685	114623	92084	88367	72394	69376	99772	92412	5852	5212	4127	3813	115419	110135	83342	82169	70050	64298	127886	123275	122244	123714	110998
53	148.044		11303	9774	12448	11299	1808	1461	1185	1331	1173	766	11504	10428	1562	1463	12097	11721	1473	1203	10717	19113	16304	14024	20196	18944	9674	9669	11729	10829	9844	8455	11381	10553	1440	1570	1365	1137	17351	11802	11863	13542	10964	6172	11519	10512	12826	11574	16945
54	149.045		7128	7262	6122	6553	6056	6394	9759	9077	6261	5753	5888	5995	4598	4119	5892	6486	5934	6208	5155	5830	5984	5867	5302	6252	6589	6496	6163	5280	6637	8173	5505	5959	5055	5835	5181	5145	6517	5190	8207	7333	8138	9011	7004	6012	6746	6108	6873
55	149.097		1883	2107	2222	2287	2832	2742	1700	1753	2532	3001	2806	2000	3000	2847	2271	2231	2354	2718	2661	1965	2408	2377	2969	2588	2481	2589	2377	2422	2980	2757	1993	2313	2569	2749	2548	2831	1945	3114	2396	2413	2598	3075	1785	2507	2619	3016	1732
56	150.043		2700	2470	4110	3510	1142	1045	1107	1121	969	1049	1858	2898	845	1222	8642	8257	814	1068	3855	4081	4642	4049	5150	4969	5216	3494	3669	2432	1386	1083	4077	3865	652	841	656	622	4216	3940	2878	3638	2383	2637	4326	4944	4165	4263	3078
57	151.026		28265	27819	40579	42717	2222	2625	1235	1182	1149	1316	12270	13265	2039	2070	36561	40134	2459	1729	33380	33102	37142	34994	40510	40503	30573	28850	33877	36629	3370	2939	36290	34833	2542	2051	2205	2099	38405	38476	29275	31389	17317	19671	44657	40208	41532	42266	30275
58	151.061		3945	4095	5578	6497	1889	1986	1810	1758	2307	2120	5534	6539	1301	1755	4781	5338	1632	1451	6708	6458	5116	4578	6038	6307	6455	6406	4816	4111	3727	3913	4698	5089	1796	1519	1206	1683	5543	4649	4260	4193	2898	3392	6178	5782	7076	5579	6622
59	152.035		68963	62736	83202	84080	19892	19716	14804	12739	17773	16747	69290	69350	19262	18653	84326	87077	18530	16252	73685	77715	72349	70767	70028	63989	74079	70787	85658	78538	47395	46674	78730	72485	19927	19387	16697	17031	86657	89065	45964	49111	21427	21300	72739	68589	85120	84275	71845
60	154.062		414606	444078	421691	464870	85045	61440	16549	16349	17201	15230	374177	373794	56319	37522	439778	433833	49941	37169	435157	460248	411140	435560	517502	518173	590611	627894	322230	370874	247609	261774	309919	336031	60941	46796	28593	23247	321290	345741	577657	633240	279176	253046	513371	538448	613118	638260	459702
61	155.01		25263	22968	78942	71438	4713	4812	4042	3345	3415	3915	60057	56478	4938	4317	80715	77876	4892	3935	55931	43947	69670	59270	98452	89336	46494	40322	95714	86573	40911	38581	70615	63168	4794	3914	4139	3444	73892	70367	52582	46128	6075	4813	58082	47328	38905	35757	53232
62	157.015		5852	6457	10106	11288	7857	6078	5102	5173	6647	4467	8095	9128	6931	6165	10739	10380	4488	3851	6350	7047	10518	10036	12160	13232	6892	6239	11464	9626	9336	6123	10193	8934	7996	6536	5583	4933	8474	8991	6626	5846	5499	5029	9537	8327	7371	7458	9584
63	157.026		30657	31944	130941	140956	12828	11507	6057	6477	8009	7168	83194	81384	10566	9703	130467	126969	9769	9700	47167	45341	118961	120133	152349	140820	29480	26441	125256	119488	48263	48262	116771	112878	12998	10744	9338	8797	113822	111280	34623	30200	7474	7900	102596	93156	61910	59491	95040
64	157.037		7742	7080	24204	25466	2174	2044	1817	1371	1866	1298	15672	13965	2403	2160	21671	22489	1984	2025	9725	8893	23866	22267	24955	23977	10069	8429	23047	22805	9929	8972	22038	19943	2250	2299	1950	1834	22224	20688	9457	7127	1950	1964	16968	15194	14005	12861	18122
65	157.05		113341	97197	230630	221901	10642	10737	5488	5408	5242	5119	161033	159215	12124	10879	208202	195832	8682	7488	81439	70529	242924	212115	190300	182084	155957	140647	227704	213938	123997	120529	215343	201313	11211	11350	7345	7314	224557	206053	116147	109951	24844	22548	139514	123617	152571	151596	153070
66	160.061		40519	37001	40346	39436	2727	2772	1319	1505	3056	3032	43520	43353	3168	2858	46340	44128	3261	2633	42057	36626	35286	33288	44251	43369	42263	41250	28880	26794	23630	22408	36728	35969	3151	3696	2624	2238	35600	33792	42661	40423	20901	21149	45106	42634	44514	44441	39907
67	163.04		16084	15324	16740	18098	4279	4732	3414	4048	3592	3565	12685	15475	5448	4529	18018	17991	4619	4440	17452	17194	17935	18341	19311	18496	15470	15360	16091	17017	8979	7812	16479	16083	3552	3842	4054	3928	17123	15935	14637	14221	6910	6162	18914	18805	18720	16844	17439
68	164.071		418145	369982	484504	482388	24539	22068	8774	9188	9763	9929	287626	290406	18830	15550	542538	547253	17015	18105	373757	370258	407195	381306	542737	519168	367045	358691	394285	377291	81460	77242	486902	472873	19828	19378	12251	11868	390850	385817	322370	325850	89964	88915	493874	484685	513257	523258	345755
69	166.975		4024	3831	4988	5671	1381	893	971	661	643	835	3537	3780	1115	1774	4236	3747	863	1209	4789	4772	3901	3193	5191	3867	5709	4930	4258	3348	2960	1926	5677	4957	1671	1187	1512	1612	3329	3293	3374	2918	4922	4407	4363	4079	5152	5097	4799
70	168.066		18224	13658	18961	17575	17035	14902	19967	19006	16816	14146	17266	16151	14441	13191	18002	18656	14673	15136	17863	16095	20187	16846	17168	16610	18758	15771	21921	17271	19383	19206	17375	14594	14529	14032	13538	14753	18767	18327	19104	17735	16781	16317	16444	17006	16838	16777	18722
71	169.049		2281	2248	2608	2238	1963	1511	1392	1076	1897	1676	2119	2236	1822	2056	2888	2503	2072	1869	1882	2484	2313	2054	2734	1831	2582	2312	2459	2142	2178	3225	2339	2087	2288	1457	1869	1928	2257	1870	2605	2009	2223	1848	2425	2472	2381	3146	2298
72	171.007		8347	8155	9990	10245	1465	1633	2039	1413	1050	1404	9188	8955	1694	1836	10027	10167	1723	1372	9016	7715	11666	10240	10362	9826	9950	10389	8948	8949	10118	10402	10259	10892	1789	1671	1954	1601	9322	9681	9178	7606	8872	9182	11225	8874	10963	11086	10082
73	171.029		5234	5182	6601	5207	2175	1954	1547	1805	1798	1526	4903	6404	1877	2336	4935	4120	1886	1463	4685	5542	6021	5177	5212	4914	5058	5005	4132	4822	4935	4755	4664	4398	2061	2381	1686	1698	6455	6955	5119	4738	3614	4773	4933	5637	5244	5338	5675
74	172.061		4626	4654	5565	6221	985	1163	1170	879	1192	1151	5621	5993	1893	1122	9206	8723	1149	987	15320	15794	6080	5376	6542	6595	7837	8493	3987	4764	5178	4573	5255	4641	1534	1083	1146	1100	5971	6032	5021	6771	13331	12650	9473	8553	5448	5184	7643
75	173.009		34442	18830	41898	36371	5851	5201	4847	4475	3883	2984	27287	25388	5877	4382	37943	36919	4539	3819	20683	14122	41556	25716	25217	21955	37593	30643	39204	27286	29052	22535	67457	52883	6639	5798	4630	5278	36119	22782	21281	14429	15148	13122	27099	18558	52675	46141	62239
76	173.047		8635	8327	13749	14046	4353	4778	3287	4514	4462	4028	15011	15334	5826	5544	10725	10852	4589	3706	15287	14352	13538	13359	8763	8490	10173	11115	8118	8230	13838	14846	9812	8452	4848	5423	3915	4896	14515	16365	8135	6720	6317	5623	15967	15593	13405	13418	14237
77	173.104		1452881	1070068	1701243	1601350	312520	254022	88485	83920	68644	66283	1840840	1747978	273161	209404	2045757	1897917	239025	184026	1240574	1056518	2053430	1594310	2215915	1964185	1614031	1410966	1661353	1347891	1438360	1299445	1476976	1212450	258927	214103	131165	107323	1497925	1263490	2945926	2530598	820596	724045	2088497	1693219	1973030	1829813	1869041
78	175.026		10113	7158	21283	19945	3510	3480	2014	2021	2640	2671	18743	19174	3423	2499	13682	14558	3001	2640	8057	7056	20710	18079	19957	18967	7674	8975	17558	15891	14726	12926	18987	18200	3730	3057	2539	3114	13918	13838	8600	6505	2376	2961	12256	12054	11243	10145	14466
79	175.061		1761488	1498037	3634966	3476965	143068	121632	49567	53362	58695	59225	2485662	2347585	154160	125713	3058579	2898486	96187	83861	1046377	932959	3947430	3433020	2596274	2398550	2483258	2258086	2990600	2737850	2032127	1933800	3261653	2976499	155908	133133	79892	67305	3095324	2859058	1640614	1493945	328154	295975	1979860	1715933	2536979	2399536	2351629
80	179.035		14714	12157	15814	16793	5808	6435	10354	9022	6498	5985	12659	14147	5692	5618	13702	15588	6706	6333	15443	14638	14034	14365	14019	14426	14167	13097	14901	15802	14300	14025	15462	15250	5122	6445	5623	6330	15976	15288	13677	14933	10597	9262	14883	13233	13607	13804	13080
81	179.056		275542	263304	164855	170538	236587	243117	471794	472987	291636	281536	206102	206633	191947	194058	206867	204470	270466	267327	174381	175437	196562	196187	222202	217562	197188	194491	220601	221196	294581	298285	193075	197913	226208	234215	219745	224164	181650	171271	297279	300807	386171	392351	210939	198335	207788	208261	205365
82	180.066		537632	470885	629727	623746	24165	25093	33190	34823	22456	20996	373556	364690	16214	17097	722716	708276	22504	21979	622306	581995	573744	524349	729389	693698	484895	470866	516519	490973	74118	74040	581311	545535	21152	21015	19292	17680	534710	506980	400836	378775	90870	87661	710074	677513	657794	636180	573786
83	182.97		5322	4974	6481	7074	615	759	931	984	803	858	5782	5358	645	850	4373	5211	654	750	4892	6315	6804	5694	5059	5726	7221	6196	6170	5917	4895	4940	6861	7367	738	1140	517	587	5912	6999	3704	4212	3470	3876	5736	5447	7601	6783	7594
84	183.066		3253	2998	2846	2722	2732	2766	3508	2833	2572	2489	2996	3533	3168	3575	2182	2935	2438	2260	3207	2855	2620	3020	3431	3157	3150	3056	3088	2421	3166	3710	2748	3291	2992	2305	2883	3314	2711	2618	2851	3716	3313	2652	3151	2678	2688	2685	2595
85	184.002		237748	190274	229479	232499	5781	5640	588	619	857	781	250771	242282	6106	4130	213946	215297	4138	2242	331973	306467	182356	163358	255431	260285	357334	337034	140004	124615	102636	100611	194043	187661	3780	3621	2040	1895	168596	160693	148409	138739	143481	141489	268648	247448	278351	278028	279199
86	184.985		19649	19291	21931	20737	6382	6868	5597	5455	5280	6802	20095	21437	7558	7759	19693	19713	6926	5903	20848	20825	21857	20372	22750	23096	22995	21447	19290	18323	15964	14633	22174	21617	7211	7037	6226	6595	19239	17658	20387	22407	19768	20040	20511	20419	25341	21629	22115
87	186.113		1688	1983	2783	2255	1307	703	508	837	836	522	3077	2618	790	814	4061	3287	829	724	1525	1871	1929	2488	3468	3219	2107	1834	1772	1767	813	1268	1588	1858	862	733	796	1277	2198	1829	1754	2321	936	1018	3237	3430	2584	2657	2483
88	187.025		96677	65720	157050	132351	14272	14324	8842	9004	9871	8032	125963	111531	14322	10413	125994	114614	9624	7863	60341	44513	159266	109733	124276	108062	154547	126581	153893	118465	100578	79061	171149	137262	15168	12411	9948	10478	134304	106662	117035	89280	32377	27519	100826	74174	163107	142420	131934
89	188.035		25450	21694	27986	27011	1952	2101	1223	1305	1599	2019	18589	18847	1946	2797	42154	37476	1820	1584	53668	49776	22745	21314	23015	20527	24134	21938	27758	27299	16393	16826	26874	27563	1937	2295	1605	1230	28353	27085	16911	15016	4170	4774	26297	24315	28335	28355	26315
90	188.056		25226	20655	40675	39434	3074	3401	1420	2033	1937	1995	40898	34175	2373	2414	47496	41644	3318	2200	59398	51217	35157	34045	46993	45812	47427	40344	26388	23868	20555	18467	33691	28375	2965	2798	1969	2375	38121	35004	23129	23919	26777	26801	50655	43967	35527	36503	46620
91	189.04		5675	5803	6279	6369	2447	2453	1643	1831	2020	2145	5815	4985	2432	2068	8582	7746	2663	1831	9742	8837	5695	5070	6734	5911	6350	6647	6348	4855	10187	8989	6345	6308	2525	2006	2363	2512	6464	5237	4557	4804	4029	3483	6464	6083	6085	6972	5853
92	190.051		38673	35059	26494	27448	2494	3741	2195	1697	2632	2183	16494	17458	2183	2647	35546	36597	2419	2564	42129	41585	21232	23433	27246	27407	33490	32796	20173	21242	10700	10601	26085	26118	3116	2313	2290	2359	20141	20272	20006	19575	4917	5123	32595	28536	34920	33461	23431
93	190.975		4768	3334	3414	2909	12485	12166	12303	12578	11701	9867	3639	3003	9366	8767	3063	3696	12739	11221	2707	2119	3868	2897	2838	2700	4298	3167	4648	2992	8214	6631	5454	3891	10113	11203	11791	11735	3996	2215	4527	4107	5293	6359	2833	2489	4443	3613	5237
94	191.02		1870349	862284	2159334	1718151	242470	206939	221521	157821	186149	98251	1541681	1345371	210528	145490	2084197	1915868	195138	110547	758976	444182	2104272	1091615	1221539	996659	1899969	1493574	2185609	1199444	1797321	1205680	4272775	2778853	333164	234435	189513	171957	1821316	1000555	1098048	536357	694463	611007	1178640	650673	2837413	2422112	3783704
95	192.067		10451	9675	13940	14492	5938	5750	4802	4938	5466	5567	11766	11279	6003	5929	16093	14185	5304	5362	9987	10817	12908	12242	17313	16478	11130	10474	15427	14800	9039	8199	15145	15911	5404	4711	5252	4325	10848	11810	12664	14171	6266	7175	11562	11678	12791	11745	12780
96	194.082		2177	2747	2154	1912	1747	2302	2006	2161	2102	1936	2490	2218	1534	2147	2335	2025	1460	2169	2024	2245	1945	2376	2648	2593	2408	2337	2794	2512	2715	2221	1739	2281	1550	1732	1901	1943	1716	1787	2269	2341	1919	2514	2192	2299	2657	2846	2859
97	195.051		7456	6815	7811	6817	5932	6348	9699	9823	6101	5954	6827	7643	4134	3666	8732	8014	5575	5335	6646	6261	7835	8253	9078	9041	7401	6859	9257	8754	10263	10058	8014	7535	5611	4302	4931	5390	8085	8680	7997	7885	7548	6341	9230	8707	7363	7170	7662
98	198.017		5503	5251	4460	4282	469	866	672	578	505	328	6435	5628	870	804	5568	5298	911	700	3906	3125	4499	3918	4577	5395	4633	4238	3816	3641	3404	2966	4524	4803	852	1012	793	607	3999	3674	4907	5064	5410	4724	4296	5760	6713	5409	5840
99	198.088		3277	2378	3586	3580	668	750	788	555	592	1004	2682	2497	507	600	3463	3507	741	918	2784	2992	3367	3017	3178	3210	3651	3153	2593	2775	1937	1908	3239	3066	712	657	881	756	3098	3501	2923	2849	2323	2174	3695	3707	3817	3870	2718
100	203.022		11044	9834	9777	9475	1593	1531	1574	1973	1816	1385	10487	9399	1312	1442	9398	9552	1362	1317	10904	9478	8797	8219	10256	10426	10527	10238	6331	6714	3426	2829	9534	8730	1334	1500	1276	1562	7771	6808	9517	7523	8731	6434	10192	10216	13685	11130	8799
101	203.083		74448	68301	90767	84555	3623	3798	1737	1941	1875	2460	43650	43633	3101	3070	100435	95389	3978	2655	77650	73505	81991	77540	110413	104627	83526	76902	76046	74694	16244	15123	91665	86304	4258	4029	2246	2002	76325	78541	64767	62156	19303	19505	92208	87762	96968	92247	107533
102	205.035		818756	442180	1222269	983356	71870	61363	45592	39764	40401	26831	941177	810595	62635	43415	880538	782264	43690	25939	330847	214840	1335742	802891	904198	734880	1258808	951611	1239529	812345	1164454	856598	1466205	1043305	88296	59631	40634	33001	1007641	701400	785858	492493	191228	157544	690805	422959	1289839	1080128	1074397
103	206.082		4855	4844	7637	7539	2494	1669	1877	1727	1355	1987	5906	5418	2094	1642	9893	8566	1592	1653	5984	7209	6590	7858	6974	5922	5829	5959	5873	5792	2887	3027	7519	7192	2243	2537	1976	1777	6782	6876	5765	4616	2382	2323	7961	7146	8066	7285	8485
104	207.077		17352	15644	11676	10789	1678	1756	1193	1545	1765	1843	7771	7439	2257	1312	14146	15090	1668	1525	17911	17716	9537	9343	11198	11643	15258	15956	10958	9305	6317	5439	12835	11425	2155	1445	1601	1740	8750	9157	10298	8923	3055	2463	11436	12040	15790	13473	10978
105	213.018		29407	23638	43526	41968	2504	2357	1763	1395	1361	1512	40352	43431	2826	2878	37312	36169	3793	2818	45425	43114	43069	44246	37390	37629	38492	37410	29565	30193	22699	22198	39667	34566	2395	2965	2104	1791	39885	40636	24385	23969	14790	14346	47564	47954	39007	43353	41359
106	214.048		17178	17346	26124	26381	2260	1927	1274	1672	1838	1612	23324	22528	1823	1855	29278	28634	2118	2061	17079	18052	33515	32728	26114	20431	21928	23857	19673	17893	11529	13453	23678	22087	2069	1793	2241	2344	22819	22751	20016	20398	12766	12631	24704	24532	26814	26495	25657
107	218.033		12103	13105	12341	12360	10628	10719	19319	19429	12254	10986	10973	11352	9793	9659	13926	13118	12626	9838	14360	12422	12815	10974	13094	11820	13562	11327	11943	12060	14198	13061	10775	10545	11619	9881	11313	11303	10538	11660	14719	12653	13005	14051	14228	12355	13707	13304	12273
108	218.103		23141	19651	32563	32680	9473	9109	15665	17477	11338	10561	27934	30043	8940	7961	37628	39724	11118	10547	66505	63440	32117	29820	27414	29205	52088	48112	28923	28790	20369	19325	29040	30574	8918	9551	8792	9834	33528	32182	19344	19341	19512	19738	32368	29915	34729	33131	39630
109	219.016		2016	2360	4047	5387	1505	1743	1491	1964	1110	1205	4272	2882	1640	1635	4850	4388	1495	1252	2085	2622	4456	2915	4082	4854	2792	5050	2928	2728	2493	4038	5424	4930	1461	1202	1539	1378	2900	2573	3368	3637	1475	2686	3565	4900	4598	2751	5042
110	221.06		30766	25173	26125	24351	6251	6584	6539	6197	5023	4288	22271	21190	6718	5988	28602	27756	7850	6799	21928	19376	25774	25119	32461	32744	25650	20747	29411	27170	24160	24573	26356	24392	5659	5546	6614	7124	28016	24898	42830	43893	19025	15112	29657	25875	25654	25435	24393
111	223.072		15207	12566	17234	17972	2971	3162	2564	2588	1677	2761	20317	18524	4691	4744	43408	42841	3167	3125	16180	16304	14522	13338	27708	26422	13625	12562	23219	23058	9024	9485	17550	15648	2903	2749	2615	2585	16408	16660	25506	26252	4682	3448	21964	20790	14607	13857	13047
112	225.09		3870	2819	4243	4934	2475	1954	1644	1466	2282	2199	3925	2751	2150	1891	3944	4201	2192	1697	3664	4029	2606	2669	4190	3091	3683	3326	3921	2952	2960	3359	4025	2962	1894	2134	2675	2365	2965	2680	3961	4131	5505	4773	3772	4436	3520	4124	4513
113	225.098		4565	3492	4603	4665	1278	1323	709	592	901	1227	2829	2257	1042	1045	4815	4957	1273	808	4259	3969	4389	4259	5140	4891	5272	5658	3609	4790	2221	2268	4308	4032	1113	1259	1009	986	3566	3635	5325	6571	3136	2980	4504	3803	5138	4685	2818
114	226.013		5420	4889	5374	4660	4879	5787	3591	1841	2088	3175	4470	4580	4381	5993	4660	4515	4780	4703	5566	4038	4211	5350	6662	5291	5576	4300	4936	4071	4621	3612	4403	3869	4847	5945	4756	5582	5822	4055	5364	4665	4265	4646	5486	4817	4734	5122	5149
115	227.035		1997	1493	1929	1863	1625	1395	982	730	1555	989	1297	1369	1745	1800	2014	1586	3242	2492	2089	1639	1889	1855	2299	1980	1244	1635	2086	1533	1679	2156	1348	1836	1176	1192	1753	1548	1770	1539	2030	1149	1748	1698	1737	1635	2209	1997	1418
116	229.012		10313	9267	11892	11176	1347	1735	1011	1103	1275	939	11431	11514	1123	1378	27259	27480	2047	1444	14140	13463	13302	11391	13466	13766	12557	12026	10159	9210	10032	9579	9286	10782	1389	1902	1239	1293	12097	12246	12902	10813	7928	7955	15544	13563	12434	13064	14963
117	235.17		13951	13370	18455	18565	4635	4195	3678	3712	3475	4514	15182	14696	6332	7261	14359	14850	3889	4233	15244	16304	14678	17530	13863	13993	13012	13245	12095	12392	10272	9258	13340	13510	4562	5379	4466	5060	16302	15760	9033	8598	4871	4004	17966	17940	19692	20637	16183
118	237.028		6997	4938	17012	15978	2667	2288	1441	1770	1432	1450	11945	11125	1911	1608	26525	26055	2302	1922	8132	6530	18716	16230	23859	22872	7816	9104	22195	20651	17933	18459	21698	21338	2536	1749	1427	1262	13407	13801	20859	18695	2633	2772	13437	11160	10366	10808	12198
119	239.017		2638	2129	2661	2595	2895	2785	2428	2967	2699	1933	3052	3352	3250	3176	2992	3225	2494	3048	2961	2940	2995	2106	2358	2979	2797	3278	3003	2677	3574	3156	3150	3332	2494	2036	2297	2691	2883	2002	2234	1934	2600	3095	2610	2625	3473	3093	3820
120	242.079		45572	33361	83362	87430	4061	4450	1406	1689	2199	1944	67140	65504	3291	2645	85664	80058	3409	2597	68864	62129	95790	81923	65248	58786	102460	98449	52605	47227	27704	28247	72119	70902	2897	3354	2777	1844	70615	64270	36972	37416	27288	28350	74875	67718	102908	103182	71150
121	243.062		111140	96696	213664	207285	8068	9267	3532	3646	3690	2970	27472	26753	4443	3791	271369	268412	7082	7027	182479	176090	229496	209590	298424	286852	220593	208195	180935	171095	14070	13399	169893	159391	7968	7319	4206	3580	199172	180701	187699	177027	96147	95516	269203	243717	182613	177974	114693
122	246.017		9049	10137	11614	12208	3680	4819	2644	2304	2865	2774	11085	11572	4566	5096	14994	14474	3973	3550	9563	9726	13787	13645	13433	12715	10062	8958	13302	13918	12137	10035	12876	11630	4318	4606	4546	4012	11534	11156	17048	17071	10752	10199	13225	12043	10786	10478	10613
123	249.055		209585	194034	147564	140662	5137	6076	2325	1476	2264	2104	108195	107959	4703	3994	136474	134675	4872	3185	180925	171223	128164	122554	143452	142793	175292	170389	104687	101793	67689	71714	120590	121307	5287	4155	3215	2887	106610	99870	109726	105283	55102	57093	127785	126596	202073	194726	71719
124	254.093		3713	3777	4940	4400	876	653	724	459	656	417	4008	4309	752	775	4666	3921	843	773	4950	3852	4054	3397	4457	4841	5132	4877	3872	3808	4167	3505	4749	4662	492	669	635	713	4490	4389	4326	4040	3105	3389	5346	4521	4577	4661	4378
125	257.103		3018	2784	3254	3309	1760	1789	1070	699	1527	1209	3129	2637	1709	1707	3550	3815	1504	1416	2966	2882	2995	3467	3664	3165	2708	3139	3039	2143	5294	5026	3019	2768	1632	1663	1906	1651	2592	2927	3084	3692	2120	2428	3468	3734	3835	3334	2742
126	258.038		7006	6107	6784	7175	698	1227	768	666	712	647	5799	6550	1041	848	6994	7978	755	884	6863	6388	6938	6126	7282	6278	7287	6300	6716	5288	4484	5295	6695	7114	798	922	996	853	6436	6028	6176	6320	5535	4466	7621	7057	6439	7025	6301
127	259.023		86887	77743	77457	78821	32388	35002	132050	127738	63332	63171	96946	100401	29548	31672	85093	87391	52580	54521	70867	66926	99235	92205	110014	109337	83045	81114	70257	70858	123996	118632	92210	88363	31325	34991	32261	35118	76104	73370	100111	101118	93649	95145	109144	99506	86175	87697	110750
128	264.952		3477	3336	3484	3514	680	988	751	442	474	888	2799	3451	696	655	3330	3026	833	524	3360	3979	5036	3401	3372	3866	3869	3434	3184	4097	2743	2978	4562	4007	1031	776	912	491	4091	3462	3563	4175	4656	6147	3605	3261	3991	4153	4024
129	267.073		206287	178188	302353	290329	8526	10658	3002	2146	2915	2266	30889	27534	4673	4374	660421	644284	10482	8742	292248	283852	303485	273392	336808	332215	375595	374214	248504	236497	35774	34660	242208	232502	7356	7557	3625	3343	282366	269243	194343	193760	92637	94763	360929	341729	311919	303514	190904
130	275.017		11367	7849	11012	11119	1868	2370	1620	1063	1154	1230	12006	11221	2572	2030	13173	12678	2041	1462	6536	5335	15171	11200	14380	14297	9629	9332	10784	7952	18351	16999	16158	12878	2224	1564	1555	1508	11442	9872	9109	7493	4682	5238	14191	11125	12068	12507	14793
131	275.125		6641	6693	9414	7743	1255	1010	394	593	1325	677	5875	5433	1239	1121	7971	7812	900	962	9873	10165	7994	7160	9312	8720	12527	11615	8266	6856	16949	17790	8236	6722	958	636	945	855	6919	6929	8412	8193	5431	5811	9286	8661	10570	9095	11726
132	277.217		1803	2056	1979	1601	2760	3096	3905	4358	2830	3263	1312	1401	2395	2495	1894	1807	2971	3174	1843	1629	1887	1509	1239	1474	1480	1626	1585	1528	2816	3130	1960	1586	3046	2896	2826	2654	2100	2303	1964	2555	3117	3422	1614	1685	2137	1785	2203
133	279.233		5454	6378	7772	6115	3852	4844	3511	3278	4184	4478	6096	5805	5785	6417	6343	5469	4272	3611	7105	6024	5235	4904	6152	6056	5362	4278	5471	4953	6593	6939	5294	5039	5166	5576	5183	5993	5286	5002	5567	5406	8244	8475	6156	6617	6825	6459	6030
134	282.084		32154	29227	55856	58203	2400	2105	1734	1348	1437	1056	5775	5858	1316	1325	156898	154071	2975	2754	54420	50616	62972	59464	73905	74625	61927	57334	49785	48615	3737	2852	48551	44511	2262	2106	1235	850	54176	50015	43788	44270	22231	21604	79757	72233	52489	54748	36802
135	289.033		10285	8383	10931	10333	3450	2877	2552	2717	2674	2094	13100	10876	2548	2436	11259	11910	2272	2388	11579	11495	12328	10462	14301	12380	11898	10890	8986	7801	11098	10724	13185	10014	2708	2851	2346	2294	9467	8877	11035	10069	7236	8684	14505	11499	14272	13470	14436
136	289.115		6619	5573	4053	4450	719	614	499	372	488	484	6191	5491	834	489	5602	5168	965	531	4341	4058	5010	4898	5273	4979	4529	4724	4468	3712	4404	4176	4365	5163	609	793	690	557	4786	4221	6351	5685	17054	16974	5192	4621	7066	6487	4004
137	296.084		4057	3175	3803	2830	322	741	431	422	519	716	2655	2760	796	458	3313	4324	635	487	2847	3664	3481	2750	4095	3382	3036	3661	2927	3309	1536	2146	3273	3613	843	475	349	733	2539	3171	3621	3370	3384	3099	3894	3506	4143	4151	2582
138	298.07		6327	4976	7154	6481	674	719	718	510	827	427	8166	7423	821	970	8603	7736	676	439	5418	5867	6467	6244	7319	6781	6337	7389	6442	6030	4713	5045	8978	7343	878	846	916	715	5916	6319	7229	6615	5710	6018	7858	7783	7110	7475	8232
139	300.289		1936	1667	1832	1857	314	383	411	351	324	408	1853	2024	296	399	1885	1681	225	192	2780	2740	1937	1957	2252	2033	1509	1485	1712	1659	908	1055	1937	1576	295	381	326	386	1517	1505	1371	1465	1080	1176	1830	2098	1971	2104	2134
140	301.216		2105	1213	1873	1513	1451	1251	15945	13449	1661	901	25173	18666	3528	2327	1818	1305	3540	1460	3097	1725	22437	19662	6627	2193	3378	2124	1780	1722	1527	1610	1495	1374	2406	1607	4280	2609	2694	1489	2136	2013	1767	1541	2423	1412	3137	1870	2763
141	306.077		2450165	2113087	2790220	2746159	59187	60537	7879	5414	7571	6705	2323311	2354724	47223	42081	3028543	3008320	48385	36215	2807811	2626441	2466654	2282810	2916297	2794069	2763469	2668426	2279085	2129547	1396010	1357617	2620458	2532411	50312	45772	18960	13898	2218421	2110996	2922087	2810770	1475879	1468781	2983642	2808223	3037921	3001315	2587690
142	306.999		3163	2448	3081	3270	584	573	341	764	447	521	3221	2788	503	398	3256	3404	823	419	2679	3489	3263	2700	3460	3530	3177	3181	2902	3042	1902	2177	3874	2868	484	430	733	607	2942	3027	2798	2934	2626	2008	3283	3447	3995	3844	2985
143	312.063		6445	5719	4264	5290	1006	925	791	832	627	1084	3660	3851	918	888	3349	4966	877	966	3997	3417	3281	3536	4450	3571	3230	3271	3121	3103	1743	1920	3716	3685	1151	907	789	1065	2779	2657	3057	3278	2368	3336	5109	4784	5040	4998	4188
144	313.217		2917	2462	4297	4668	749	893	522	615	718	793	3239	3570	908	901	5551	5156	895	772	3777	3592	3504	3490	4210	4103	2828	2791	3410	3166	2573	1979	3215	3854	1051	901	1059	685	3086	3093	3246	3212	2053	2133	3649	3433	3443	3358	3595
145	316.285		2010	1653	2160	3193	335	343	301	420	285	251	2265	3093	399	300	3121	3583	486	192	3314	2694	2814	2712	2465	2478	1738	1377	2056	1721	1291	1950	1743	1685	346	391	181	271	2971	2318	1681	1346	1920	1224	5281	4883	3124	3109	3863
146	317.214		1302	968	1523	1091	974	580	1321	1743	1279	953	2051	1742	1650	1299	1418	1356	1360	656	1329	1306	2274	2281	1267	1422	1739	1219	1372	1330	2674	2942	946	1334	1294	1005	1204	896	1202	1838	1501	1141	1423	1264	1693	1296	1841	1357	1789
147	321.112		5544	4967	3344	3102	951	955	759	687	1942	1574	3945	3589	788	1188	2131	3007	1002	632	5383	6012	3658	3107	1673	1558	1861	2091	1563	1734	1640	1764	1785	2069	594	950	823	602	2534	2913	1215	1525	1316	1240	4868	4685	5066	5432	2844
148	322.045		16563	13827	21945	23325	1293	1531	816	906	868	757	10379	10840	1404	1083	37052	35539	1204	1717	15868	16033	22822	20181	25942	26684	18624	20604	20019	16529	8587	9177	20685	20737	1466	1449	547	844	18301	17308	22854	23716	11128	10492	24771	22865	22499	23515	18860
149	323.028		40621	34710	75748	69716	3180	2709	2014	1596	2224	1722	35783	37815	2160	2137	144136	144971	4162	3314	46262	44379	71841	69142	86493	86001	54089	54931	60765	59268	33277	30865	65537	61755	3995	2934	2411	2471	68702	62374	64462	59648	18532	20684	78081	78667	61242	59556	56851
150	338.989		104733	84863	92627	88303	9913	8495	4538	3718	4523	3546	100622	104889	8997	7990	82777	84170	8512	5720	67258	61825	140201	122833	118610	115228	63366	57637	109574	97517	162950	155478	127126	118903	10660	9823	7001	5647	92874	83749	175594	166491	141634	142700	97267	88055	103653	98304	120414
151	341.109		2430135	1854650	4908899	4680418	121522	128851	39625	36212	31725	29238	7176937	6960110	176535	157647	1659412	1572845	60195	48540	9430901	8368604	5442434	4580203	5208784	4845552	8825519	8138398	2629783	2232078	612306	571975	6602361	5867933	139802	139065	62469	42245	2851066	2558113	608805	555185	617048	601279	5497471	4835071	5802915	5546955	7579203
152	346.055		81903	69154	94397	92972	4692	3620	891	900	1358	1332	78939	80746	2984	3374	302803	295594	5504	4536	55174	50755	103610	100788	141216	138779	72212	72218	84852	79422	217446	212296	88335	84864	3478	3353	2197	1818	100257	95407	204376	191186	61519	61866	152269	137734	98424	94163	93122
153	347.041		8797	7603	8256	9064	932	490	410	481	443	336	6155	6599	760	288	10536	11950	819	613	7267	6790	7524	6689	8317	9086	8486	9144	7705	6310	9014	8197	7514	7705	780	671	507	494	7863	6986	8949	7198	3756	3878	8429	8412	11940	9985	5651
154	348.088		5752	5495	5325	4883	906	1100	355	282	376	317	4781	4191	842	1009	5266	6193	482	276	5079	4878	4121	4348	5838	5219	5244	5122	5228	5089	4187	4060	4474	4996	505	486	513	391	4629	3836	5639	5428	6018	5664	5622	5430	6060	6181	4994
155	355.067		4012	3801	6252	6131	841	878	810	834	653	575	4765	5002	900	776	6015	5940	861	991	5321	5805	7378	6726	5370	5398	6776	8180	4829	4935	3028	2934	5425	5220	521	840	552	407	5953	5676	3459	3815	3569	2736	5261	5970	7412	6970	5445
156	362.05		7934	6120	13896	14110	1468	936	682	996	820	544	6567	6447	1080	967	25735	25998	1054	884	10204	9339	17872	14867	17291	16287	12252	9815	13677	12858	11905	9862	14732	13755	1000	1345	631	676	12869	12534	19464	16721	6143	6534	14503	14926	13196	12805	10474
157	363.034		1979	2094	2375	2148	523	502	700	493	416	607	1834	1718	651	953	1829	2204	498	508	2251	2163	2508	1939	2651	2176	2068	1868	1819	1914	2198	1821	2293	2134	618	527	592	536	2081	1952	2126	2161	1520	2429	2212	2171	2506	2482	2198
158	367.018		2851	2904	2727	2393	734	810	663	430	512	445	2437	2284	420	518	2905	3305	445	383	2534	2363	2832	1907	2904	2910	2356	2186	2546	2215	3267	3230	3082	2748	833	726	477	720	2220	1657	2551	2392	1518	1476	2898	2218	2551	2700	2469
159	369.001		17669	17133	14415	15181	1886	1713	2082	2224	864	1316	13928	14164	1451	1540	18867	19456	1570	1899	11481	13324	17572	17440	15721	16277	13517	13778	17149	18440	13802	14739	15975	14465	1617	1485	1358	833	16097	15787	22303	23115	9112	9249	17062	17748	16201	18602	12557
160	381.123		34285	30185	39063	35780	3964	3453	2376	1742	2717	2177	35869	32003	4114	3894	32629	34092	2777	2042	29625	27150	47164	40426	47875	44658	36271	33763	33920	33258	37507	36006	39793	36415	3678	3257	2264	2438	35618	36051	40131	33536	18166	19510	44060	41642	41470	42776	43969
161	383.114		10183	8294	14622	12546	2974	2612	2629	2522	2827	2052	12068	12816	3357	2948	22036	20742	2587	2529	11115	9717	13059	12190	16788	16183	12554	11514	15747	14683	7370	7434	17183	16462	2809	2588	2732	2321	11972	12263	27304	23616	9754	9423	14797	12904	13656	13513	19988
162	387		5325	3895	5483	5844	511	800	595	519	528	644	6244	5809	799	795	5991	6365	1188	624	6289	5534	5048	5575	6624	7020	5324	6415	4112	4507	4948	4489	5117	5472	934	592	647	491	5511	4578	6096	5872	3887	4330	8194	7755	6501	7713	6241
163	401.015		1974	2059	2232	2584	680	1037	592	661	451	541	1976	2562	980	729	3927	3617	830	746	1868	1816	2857	2627	2958	2931	2078	2194	3072	2839	3374	3316	2732	2439	793	872	865	614	2182	2386	6339	6489	3163	3803	2447	2923	2649	2477	3020
164	402.011		5464	3805	6239	5905	1018	1069	407	670	851	536	5550	5450	1252	1077	10916	11023	1420	1003	2776	3334	6620	5798	7168	7604	4557	4078	7769	6602	5551	4977	6133	5595	1060	726	1260	936	5586	5327	22935	19618	10482	9351	6072	5243	4976	5445	5369
165	402.995		27735	24301	39040	40993	5471	4534	1763	2313	2344	2331	28633	28665	4277	3073	88323	90554	5937	4212	17686	17449	50225	48065	51950	54118	21099	19154	66192	60306	23764	22135	44665	40625	4986	4574	3312	2659	38453	39041	125438	120964	31670	32332	41444	36679	28737	28929	30836
166	418.956		6050	4882	4086	3716	25643	24665	36399	37889	31597	30140	3473	3997	22017	23098	3749	5015	26441	26719	3823	4210	4886	3640	4094	4003	4278	3758	6868	6322	13198	14071	3548	3505	23053	21603	26190	25547	4957	4092	7748	6379	12394	12305	4020	3548	4431	3957	4899
167	421.075		13301	11327	21406	20614	2125	2294	5923	5605	5146	5079	25070	25173	2692	2714	14698	13207	2642	2641	29833	26180	21309	19388	21446	20018	28793	27701	14864	13039	8214	8052	30443	25803	1777	1645	1924	1712	16584	14365	13225	11463	11039	10070	24046	21450	25313	24780	26638
168	423.164		2492	2383	3878	3813	2904	2951	1401	1613	2698	1661	2725	2772	4087	4466	3207	3018	2546	2442	3854	3904	2580	1735	2418	2487	2519	2624	2299	2316	2260	2815	3613	3508	2701	2851	5217	5262	3185	2189	3166	3620	3117	2749	2131	2590	5463	5839	3511
169	426.022		71666	60156	71986	68663	8349	7432	3475	3378	4032	3274	57679	56034	7521	5456	102384	101639	7525	6093	44285	40575	77281	68140	76067	74438	48008	45806	84353	80559	82542	82513	71816	67976	8221	5631	4659	3613	68114	63446	204079	192197	91851	87772	74720	64812	68071	64350	63454
170	441.337		3872	4183	7247	6178	814	999	538	681	813	507	7388	8126	1055	828	8255	8520	713	878	8096	7745	5707	6532	8421	8095	6667	6490	6647	6455	3542	4237	8053	7420	851	593	554	740	5566	5938	7650	7605	3048	3546	8648	8293	6716	7509	6784
171	442.017		33711	29294	33741	34064	2222	1694	951	867	904	1351	28690	29927	1360	984	40435	40794	1292	1190	28430	30594	28206	29301	34400	34241	35634	35968	28703	27001	19846	20471	36487	34166	1369	1516	963	723	29700	26249	37977	36425	22991	23047	36913	36833	39635	39943	33731
172	449.186		6054	6738	7776	8686	1332	946	927	735	895	727	6862	6290	1341	1387	8484	7924	895	896	6350	6394	9029	8320	8267	8396	6973	6327	7789	8916	5111	4299	9264	8829	1651	1027	908	840	7744	7968	5313	5810	3714	3456	8708	8637	7498	7282	8652
173	453.067		1758	1499	3296	2624	573	903	1042	1141	607	663	3079	2880	735	579	2700	2384	685	632	2364	2871	2345	3000	2501	2931	3094	2682	2705	2117	1940	1817	2789	3455	758	620	591	438	2169	1995	2044	1458	1744	1702	2708	2900	2619	2645	3090
174	455.098		3587	4011	6903	6160	1071	842	625	695	678	707	6482	7343	1033	1003	5647	6865	816	684	7385	7452	6533	6625	8412	6521	6495	6884	5836	5586	2999	3123	6075	7480	1105	875	808	865	4600	5124	9080	8718	3774	3913	6706	7298	6142	7823	6219
175	480.981		2926	2628	3899	4575	2625	2802	1543	1398	2241	2083	3430	3735	2676	2777	4263	3976	1864	1585	4047	4093	3685	3514	3813	4042	4363	4060	4190	3980	2596	2767	3765	4040	2565	2409	2212	2198	3817	3532	6838	6336	4261	4737	3814	4005	4255	3440	3726
176	481.978		10152	8919	12661	12121	2756	1808	1541	1832	972	1312	10663	12088	2137	1708	24173	23428	1749	1672	7305	7322	12877	12486	15624	14953	9067	9282	13771	12740	15590	15101	12282	11021	2648	2222	1287	1748	10847	10563	33801	31814	16564	16328	13794	13814	11722	10832	11862
177	482.962		22789	18260	33586	31951	5908	5223	2621	2110	2362	2391	27009	26574	4715	4493	38164	38032	4591	3968	12598	10709	35635	32529	41246	35727	12955	11939	63405	54794	16212	14784	35776	35220	5441	4459	4056	3462	30614	30285	106352	98128	32541	29974	20436	17915	21061	20592	24233
178	503.161		32592	27435	36820	31953	7808	7949	9607	9887	9039	7747	51125	51360	8188	8837	24566	22412	7625	7459	59404	57248	43708	38960	39515	37209	56743	58117	37577	32362	24293	23622	46340	43642	7578	8114	6812	6657	34346	30621	25172	21981	18209	18762	41337	38036	43987	43945	55538
179	505.988		43172	36222	51740	50947	9731	7693	5163	4674	4129	3599	43446	43992	7401	5142	48388	47532	5875	4966	23270	20497	50262	41582	51342	47847	26567	24607	69017	61328	48873	49230	48409	41395	8862	5984	4398	3036	45017	43364	173440	155635	78944	75854	38596	33946	38658	40815	38562
180	521.983		5643	4346	5500	5039	1660	1544	1071	877	1076	783	4512	4296	1220	914	5658	3996	1231	1138	3745	3196	5094	3729	5191	5303	5206	3946	7434	6137	6514	6013	5693	5531	1782	1318	1514	768	4374	4340	16967	13764	11206	10525	4949	4511	5466	5085	4885
181	539.996		5824	5599	7073	7128	522	563	500	417	610	443	5771	5636	673	424	7529	7567	690	526	5496	5536	6286	6225	6578	6055	4425	5023	6282	6023	4594	4727	6346	5658	355	446	471	347	4929	4615	8050	7975	4948	5495	5865	5480	5677	5767	5932
182	558.064		2811	2506	3784	3722	439	376	291	347	1282	984	3135	3194	639	603	4691	5254	409	457	1735	2624	3545	3691	3231	3817	2289	1785	5977	5469	4925	5282	3359	4074	307	386	579	376	3423	4005	11777	11840	6585	7727	3017	3368	3268	3236	3092
183	563.069		4833	3384	6421	6253	576	621	461	289	518	361	7026	7371	634	784	10019	9656	389	606	2920	3019	6832	6646	8132	7540	3427	3248	11342	9300	4258	4664	7380	5717	585	840	591	373	6459	5662	28110	26519	6586	6467	6312	6477	6732	7220	5921
184	565.048		48796	41790	93890	90640	2209	2182	697	707	983	903	95762	94878	2510	2323	123598	120448	3040	2075	43381	39927	119399	106220	136726	130055	44379	43802	135594	128064	38319	37347	118151	109177	2609	2616	1474	784	83108	77633	228225	215006	75235	74686	83450	73722	65203	64632	74164
185	604.07		5958	4618	7359	6529	365	327	245	246	405	434	11015	11718	615	422	9405	8963	399	715	5211	4791	8956	6714	8990	8657	5566	5333	10743	9375	11605	11328	8341	7004	580	440	337	412	6515	5823	29126	24559	13691	13737	6900	6358	7469	6689	7193
186	606.075		211131	179929	325946	321767	6825	6852	1147	854	1214	1233	348471	350638	6310	5916	557844	550708	7369	5690	97144	88593	349987	317273	434237	427326	111002	104072	575574	536274	199728	190172	347728	334409	6157	5991	2687	1123	301772	280486	1725073	1649706	305210	314919	348977	316265	282848	275462	235772
187	611.144		3531	2957	6769	5867	433	339	645	743	554	331	8190	7134	543	617	9824	9322	587	426	3205	2553	5572	4129	6331	5378	2748	2903	13106	10612	6894	6859	6846	5760	691	656	468	396	5517	4689	20596	18258	5127	5097	4754	3863	4901	4391	4012
188	664.118		2953	2409	3296	2681	325	232	183	101	242	96	3938	3243	132	206	5565	6058	266	267	2036	1840	3252	2236	4432	5004	3616	3881	4797	4850	30959	29579	3526	3233	314	249	274	273	2988	2610	35508	31124	27752	28533	2883	2919	4989	4458	3552
189	665.213		8002	6836	9256	10397	1962	1291	1702	2066	1829	1936	9576	9652	2693	2143	9008	8281	1763	1895	8480	7994	9668	8867	9914	7953	7404	7519	10450	8961	8920	6570	8953	7661	1758	1591	1460	1641	10422	9714	9994	9261	5512	5464	8390	8087	8960	8185	8407
190	766.107		822	796	914	861	212	162	556	303	298	134	1051	786	361	167	1135	1174	157	152	1260	647	725	1028	968	837	930	785	1235	962	1817	2140	1283	933	209	344	328	191	799	740	2036	2217	1369	1430	613	946	1039	870	661
191	784.149		1070	819	1258	1390	269	305	535	653	268	369	1399	1357	371	269	1804	1782	257	240	1301	1212	1737	1347	1843	1559	1175	1488	1652	1624	1719	1343	1381	1296	215	208	348	228	1267	1255	3115	3199	1312	1029	1254	1659	1505	1264	1370
192	808.118		3177	2997	4713	4877	807	903	1017	929	733	763	4048	4094	901	983	5775	5606	896	934	3306	2885	5234	4980	5146	4586	3596	3009	6349	5830	7782	7354	4551	4210	1059	860	842	690	4576	4460	16618	15083	6758	7563	4257	3645	4608	3236	3658
[truncated: 5,000 more columns]
