# Supplementary material for: Dynamic metabolome profiling uncovers potential TOR signaling genes
Source: eLife. 2023 Jan 4;12:e84295. doi: 10.7554/eLife.84295 (PMC9812406; doi:10.7554/eLife.84295)
Supplement: Supplementary file 3. [file elife-84295-supp3.xlsx]

## Sheet: supplementary_table_3
Time (min)	A (%)	B (%)	Flow (mL/min)
0	4	96	0.25
2	4	96	0.25
5.5	12	88	0.25
8.5	12	88	0.25
9	14	86	0.25
14	14	86	0.25
17	18	82	0.25
23	35	65	0.25
24	35	65	0.25
24.5	4	96	0.25
26	4	96	0.25
